# Supplementary material
Source: PubMed Central journal article supplement (PMC4948012)
Supplement: ml6b00120_si_001.pdf [file ml6b00120_si_001.pdf]

# Supporting Information

## Charged Non-Classical Antifolates with Activity Against Gram-positive and Gram-negative Pathogens

*Eric Scocchera<sup>\*1</sup>, Stephanie M. Reeve<sup>\*1</sup>, Santosh Keshipeddy<sup>1</sup>, Michael N. Lombardo<sup>1</sup>, Behnoush Hajian<sup>1</sup>, Adrienne E. Sochia<sup>2</sup>, Jeremy B. Alverson<sup>2</sup>, Nigel D. Priestley<sup>2</sup>, Amy C. Anderson<sup>\*1</sup> & Dennis L. Wright<sup>\*1</sup>*

<sup>1</sup>*Department of Pharmaceutical Sciences, University of Connecticut, 69 N. Eagleville Rd, Storrs, Connecticut 06269-3060*

<sup>2</sup>*Department of Chemistry, University of Montana, Missoula, MT 59812*

[dennis.wright@uconn.edu](mailto:dennis.wright@uconn.edu)

[amy.anderson@uconn.edu](mailto:amy.anderson@uconn.edu)

### Table of Contents

|                                                                                                |         |
|------------------------------------------------------------------------------------------------|---------|
| General Experimental.....                                                                      | S2      |
| Synthetic Procedures and Experimental for Compounds <b>1-11</b> .....                          | S3-S27  |
| Table S1. Enzyme Inhibition Values with Standard Deviations.....                               | S28     |
| Table S2. Data Collection and Structure Refinement Statistics.....                             | S29     |
| Table S3. Minimum Bactericidal Concentrations.....                                             | S30     |
| Table S4. MIC Values in <i>E. coli</i> wild-type and <i>E. coli</i> $\Delta$ <i>acrB</i> ..... | S30     |
| Figure S1. Electron Density of active site residues.....                                       | S31     |
| Biological Materials and Methods.....                                                          | S32-S37 |
| Copies of <sup>1</sup> H and <sup>13</sup> C NMR Spectra.....                                  | S38-S79 |
| Copies of HPLCs.....                                                                           | S80-S99 |

**General Experimental.** All reactions, unless specified, were conducted under an atmosphere of Argon in glassware that had been flame dried. Methylene chloride (CH<sub>2</sub>Cl<sub>2</sub>) was used from Baker Cycle-Tainers, anhydrous toluene, *tert*-butyl methyl ether (MTBE), dioxane, triethylamine and dimethylformamide (DMF) were purchased from Sigma-Aldrich. Josiphos was purchased from STREM, pyridine boronic acid from Frontier Scientific, MeMgBr (3.0 M in diethyl ether); CuBr·Me<sub>2</sub>S from Sigma-Aldrich and was recrystallized from Me<sub>2</sub>S prior to use. Where appropriate, control of temperature was achieved with a Neslab Cryocool CC-100 II immersion cooler, ice-bath or a heated oil bath. <sup>1</sup>H NMR spectra were recorded at 400 MHz, and/or at 500 MHz and calibrated to the CDCl<sub>3</sub> peak at 7.28 ppm. <sup>13</sup>C NMR spectra were recorded at 100MHz, and/or at 125 MHz and calibrated to the CDCl<sub>3</sub> peak at 77.23 ppm. Chemical shifts are reported in units of parts per million (ppm). High-resolution mass spectra were obtained on the JMS-AX505HA instruments and/or on an AccuTOF instrument at the University of Connecticut. Flash chromatography was performed on Silica Gel, 40 microns, 32-63 flash silica and/or -NH<sub>2</sub> capped spherical silica gel. Thin layer chromatography was performed on silica gel (Silica Gel 60 F<sub>254</sub>) glass plates and the compounds were visualized by UV and/or potassium permanganate stain.

## Synthetic Methods

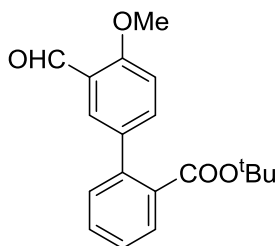

**3'-Formyl-4'-methoxy-biphenyl-2-carboxylic acid *tert*-butyl ester (1a).** In a screw cap pressure vessel fitted with a stir bar was added 2-(*tert*-Butoxycarbonylphenyl) boronic acid (1.00 g, 4.98 mmol), 3-Bromo-5-methoxybenzaldehyde (1.28 g, 4.98 mmol), Pd(PPh<sub>3</sub>)<sub>4</sub> (0.29 g, 0.25 mmol, 5% Pd), Cs<sub>2</sub>CO<sub>3</sub> (4.09 g, 12.45 mmol), anhydrous dioxane (20 mL), and water (2 mL). The mixture was degassed by bubbling argon through for 15 min, sealed, and heated to 100 °C for 4 h, when TLC showed consumption of aryl bromide. Reaction diluted with saturated brine, and extracted 3x with EtOAc. Combined organic layers dried over NaSO<sub>4</sub> and filtered. Filtrate concentrated and purified by flash column chromatography (SiO<sub>2</sub>, 40 g, 5% EtOAc/hexanes) to afford bicyclic ester **1a** as a slightly yellow solid (1.34 g, 86%); <sup>1</sup>H NMR (500 MHz, CDCl<sub>3</sub>) δ 10.55 (s, 1H), 7.86 (d, *J* = 2.4 Hz, 1H), 7.84 (dd, *J* = 7.7, 1.4 Hz, 1H), 7.57 (dd, *J* = 8.5, 2.4 Hz, 1H), 7.53 (td, *J* = 7.6, 1.5 Hz, 1H), 7.44 (td, *J* = 7.6, 1.3 Hz, 1H), 7.35 (dd, *J* = 7.7, 1.3 Hz, 1H), 7.08 (d, *J* = 8.5 Hz, 1H), 4.03 (s, 3H), 1.38 (s, 9H); <sup>13</sup>C NMR (126 MHz, CDCl<sub>3</sub>) δ 189.5, 167.6, 161.1, 140.5, 136.0, 134.5, 132.7, 130.9, 130.6, 129.9, 128.7, 127.3, 124.4, 111.4, 81.5, 55.9, 27.8; HRMS (DART [M+H]<sup>+</sup>) *m/z* 313.1433 (calculated for C<sub>19</sub>H<sub>21</sub>O<sub>4</sub>, 313.1440).

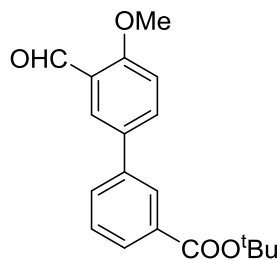

**3'-Formyl-4'-methoxy-biphenyl-3-carboxylic acid *tert*-butyl ester (1b).** According to the general Suzuki coupling procedure, 3-(*tert*-Butoxycarbonylphenyl) boronic acid (0.50 g, 2.25 mmol), 3-Bromo-5-methoxybenzaldehyde (0.48 g, 2.25 mmol), Pd(PPh<sub>3</sub>)<sub>4</sub> (0.13 g, 0.11 mmol, 5% Pd), Cs<sub>2</sub>CO<sub>3</sub> (1.47 g, 4.5 mmol), anhydrous dioxane (10 mL), and water (1 mL) were added to 50 mL screw cap pressure vessel. The mixture was degassed by bubbling argon through for 15 min, sealed, and heated to 100 °C for 4 h, when TLC showed consumption of aryl bromide. Reaction diluted with saturated brine, and extracted 3x with EtOAc. Combined organic layers dried over NaSO<sub>4</sub> and filtered. Filtrate concentrated and purified by flash column chromatography (SiO<sub>2</sub>, 20 g, 5% EtOAc/hexanes) to afford bicyclic ester **1b** as a slightly yellow solid (0.52 g, 74%); <sup>1</sup>H NMR (500 MHz, CDCl<sub>3</sub>) δ 10.57 (s, 1H), 8.23 (t, *J* = 1.9 Hz, 1H), 8.14 (d, *J* = 2.5 Hz, 1H), 8.00 (dt, *J* = 7.7, 1.4 Hz, 1H), 7.87 (dd, *J* = 8.6, 2.5 Hz, 1H), 7.77 (dt, *J* = 7.7, 1.4 Hz, 1H), 7.52 (t, *J* = 7.7 Hz, 1H), 7.14 (d, *J* = 8.6 Hz, 1H), 4.03 (s, 3H), 1.67 (s, 9H); <sup>13</sup>C NMR (126 MHz, CDCl<sub>3</sub>) δ 189.7, 165.7, 161.5, 139.7, 134.4, 133.0, 132.7, 130.7, 128.8, 128.3, 127.6, 127.0, 125.0, 112.3, 112.3, 81.3, 55.9, 28.2, 28.2; HRMS (DART [M+H]<sup>+</sup>) *m/z* 313.1434 (calculated for C<sub>19</sub>H<sub>21</sub>O<sub>4</sub>, 313.1440).

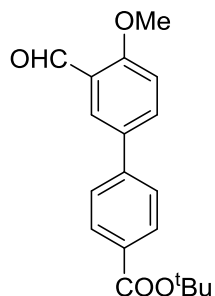

**3'-Formyl-4'-methoxy-biphenyl-4-carboxylic acid *tert*-butyl ester (1c).** According to the general Suzuki coupling procedure, 4-(*tert*-Butoxycarbonylphenyl) boronic acid (1.00 g, 4.98 mmol), 3-Bromo-5-methoxybenzaldehyde (1.28 g, 4.98 mmol), Pd(PPh<sub>3</sub>)<sub>4</sub> (0.29 g, 0.25 mmol, 5% Pd), Cs<sub>2</sub>CO<sub>3</sub> (4.09 g, 12.45 mmol), anhydrous dioxane (20 mL), and water (2 mL) were added to 50 mL screw cap pressure vessel. The mixture was degassed by bubbling argon through for 15 min, sealed, and heated to 100 °C for 4 h, when TLC showed consumption of aryl bromide. Reaction diluted with saturated brine, and extracted 3x with EtOAc. Combined organic layers dried over NaSO<sub>4</sub> and filtered. Filtrate concentrated and purified by flash column chromatography (SiO<sub>2</sub>, 40 g, 5% EtOAc/hexanes) to afford bicyclic ester **1c** as a slightly yellow solid (1.23 g, 79%); <sup>1</sup>H NMR (500 MHz, CDCl<sub>3</sub>) δ 10.53 (s, 1H), 8.12 (d, *J* = 1.9 Hz, 1H), 8.06 (d, *J* = 8.1 Hz, 2H), 7.83 (d, *J* = 10.5 Hz, 1H), 7.63 (d, *J* = 8.1 Hz, 2H), 7.10 (d, *J* = 8.7 Hz, 1H), 4.00 (s, 3H), 1.63 (s, 9H); <sup>13</sup>C NMR (126 MHz, CDCl<sub>3</sub>) δ 189.5, 165.5, 161.7, 143.3, 134.4, 132.7, 130.8, 130.0, 126.9, 126.3, 125.0, 112.3, 81.1, 55.9, 28.2; HRMS (DART [M+H]<sup>+</sup>) *m/z* 313.1412 (calculated for C<sub>19</sub>H<sub>21</sub>O<sub>4</sub>, 313.1440).

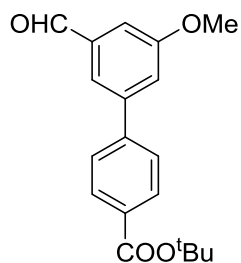

**5'-Formyl-3'-methoxy-biphenyl-4-carboxylic acid *tert*-butyl ester (1d).** According to the general Suzuki coupling procedure, 4-(*tert*-Butoxycarbonylphenyl) boronic acid (0.50 g, 2.25 mmol), 3-Bromo-4-methoxybenzaldehyde (0.48 g, 2.25 mmol), Pd(PPh<sub>3</sub>)<sub>4</sub> (0.13 g, 0.11 mmol, 5% Pd), Cs<sub>2</sub>CO<sub>3</sub> (1.47 g, 4.5 mmol), anhydrous dioxane (10 mL), and water (1 mL) were added to 50 mL screw cap pressure vessel. The mixture was degassed by bubbling argon through for 15 min, sealed, and heated to 100 °C for 4 h, when TLC showed consumption of aryl bromide. Reaction diluted with saturated brine, and extracted 3x with EtOAc. Combined organic layers dried over NaSO<sub>4</sub> and filtered. Filtrate concentrated and purified by flash column chromatography (SiO<sub>2</sub>, 20 g, 5% EtOAc/hexanes) to afford bicyclic ester **1d** as a slightly yellow solid (0.54 g, 77%); <sup>1</sup>H NMR (500 MHz, CDCl<sub>3</sub>) δ 10.09 (s, 1H), 8.12 (d, *J* = 8.4 Hz, 2H), 7.74 (m, 1H), 7.70 (d, *J* = 8.4 Hz, 2H), 7.45 (d, *J* = 1.7 Hz, 2H), 3.97 (s, 3H), 1.66 (s, 9H); <sup>13</sup>C NMR (126 MHz, CDCl<sub>3</sub>) δ 191.9, 165.4, 160.7, 143.4, 142.5, 138.4, 131.7, 130.1, 126.9, 122.3, 120.2, 111.7, 81.3, 55.8, 55.7, 28.2; HRMS (DART [M+H]<sup>+</sup>) *m/z* 313.1450 (calculated for C<sub>19</sub>H<sub>21</sub>O<sub>4</sub>, 313.1440).

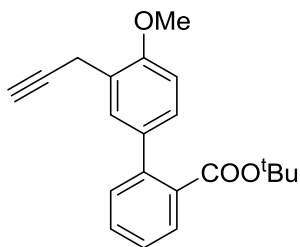

**4'-Methoxy-3'-prop-2-ynyl-biphenyl-2-carboxylic acid *tert*-butyl ester (2a).** In a dried RB flask fitted with a stir bar under argon atmosphere, methoxymethyl triphenylphosphonium chloride (1.37 g, 4.00 mmol) was dissolved in dry THF (10 mL) and cooled to 0 °C. Sodium *tert*-butoxide (0.39 g, 4.00 mmol) was added (reaction turned dark red) and stirred for 20 min. Aldehyde (0.50 g, 1.60 mmol) dissolved in dry THF (5 mL) was added (reaction turned orange). TLC showed SM consumption after 30 min. Reaction quenched with saturated NH<sub>4</sub>Cl and extracted with EtOAc (3 x 15 mL). Combined organic layer washed with brine, dried over NaSO<sub>4</sub> and filtered. Filtrate passed through a column of silica gel (10% EtOAc in hexanes) to afford a mixture of enol ether isomers, which were immediately hydrolyzed in the subsequent step.

In a dried RB flask fitted with a stir bar under argon atmosphere was added enol ether (0.48 g, 1.41 mmol) in MeCN (20 mL). Sodium iodide (0.23 g, 1.55 mmol) added and cooled to -20 °C. TMSCl (0.17 g, 1.55 mmol) added, stirred at -20 °C for 30 min, when TLC showed SM consumption. Reaction diluted with EtOAc (20 mL) and Na<sub>2</sub>S<sub>2</sub>O<sub>3</sub> (10 mL), stirred until reaction warmed to rt. Organic layer separated and aqueous phase extracted with EtOAc (3 x 20 mL). Combined organic layers washed with brine, dried over NaSO<sub>4</sub> and filtered. Filtrate concentrated and used without further purification.

In a dried RB flask fitted with a stir bar under argon atmosphere was added aldehyde (0.28 g, 0.86 mmol) in MeOH (5 mL). Ohira-Bestmann reagent (0.33 g, 1.72 mmol) was added (turned yellow/green) and cooled to 0 °C. Powdered K<sub>2</sub>CO<sub>3</sub> (0.36 g, 2.58 mmol) added and stirred at 0 °C for 2 h, when TLC showed consumption of SM. Reaction diluted with brine (5 mL) and extracted with EtOAc (3 x 15 mL). Combined organic layer washed with brine, dried over NaSO<sub>4</sub> and filtered. The filtrate was concentrated and purified by flash column chromatography (SiO<sub>2</sub>, 10 g, 5% EtOAc/hexanes) to afford bicyclic alkyne **2a** as a white solid (0.20 g, 39% yield 3 steps); <sup>1</sup>H NMR (500 MHz, CDCl<sub>3</sub>) δ 7.81 (dd, *J* = 7.7, 1.4 Hz, 1H), 7.54 (dd, *J* = 2.4, 1.2 Hz, 1H), 7.52 (td, *J* = 7.5, 1.3, 1H), 7.42 (td, *J* = 7.5, 1.3 Hz, 1H), 7.38 (dd, *J* = 7.5, 1.3 Hz, 1H), 7.25 (dd, *J* = 8.3, 2.3 Hz, 1H), 6.93 (d, *J* = 8.3 Hz, 1H), 3.93 (s, 3H), 3.66 (d, *J* = 2.7 Hz, 2H), 2.19 (t, *J* = 2.7 Hz, 1H), 1.37 (s, 9H); <sup>13</sup>C NMR (126 MHz, CDCl<sub>3</sub>) δ 168.2, 156.2, 141.8, 134.2, 133.1, 130.7, 130.6, 129.6, 129.3, 129.3, 127.9, 126.8, 124.0, 109.7, 81.7, 81.2, 70.7, 55.6, 55.6, 27.8, 19.3. HRMS (DART [M]<sup>+</sup>) *m/z* 322.1573 (calculated for C<sub>21</sub>H<sub>23</sub>O<sub>3</sub> 322.1569).

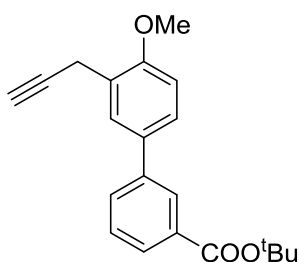

**4'-Methoxy-3'-prop-2-ynyl-biphenyl-3-carboxylic acid *tert*-butyl ester (2b).** In a dried RB flask fitted with a stir bar under argon atmosphere, methoxymethyl triphenylphosphonium chloride (0.88 g, 2.56 mmol) was dissolved in dry THF (8 mL) and cooled to 0 °C. Sodium *tert*-butoxide (0.25 g, 2.56 mmol) was added (reaction



turned dark red) and stirred for 20 min. Aldehyde (0.40 g, 1.28 mmol) dissolved in dry THF (4 mL) was added (reaction turned orange). TLC showed SM consumption after 30 min. Reaction quenched with saturated  $\text{NH}_4\text{Cl}$  and extracted with EtOAc (3 x 15 mL). Combined organic layer washed with brine, dried over  $\text{NaSO}_4$  and filtered. Filtrate passed through a column of silica gel (10% EtOAc in hexanes) to afford a mixture of enol ether isomers, which were immediately hydrolyzed in the subsequent step.

In a dried RB flask fitted with a stir bar under argon atmosphere was added enol ether (0.39 g, 1.15 mmol) in MeCN (15 mL). Sodium iodide (0.21 g, 1.38 mmol) added and cooled to  $-20\text{ }^\circ\text{C}$ . TMSI (0.15 g, 1.38 mmol) added, stirred at  $-20\text{ }^\circ\text{C}$  for 30 min, when TLC showed SM consumption. Reaction diluted with EtOAc (20 mL) and  $\text{Na}_2\text{S}_2\text{O}_3$  (10 mL), stirred until reaction warmed to rt. Organic layer separated and aqueous phase extracted with EtOAc (3 x 20 mL). Combined organic layers washed with brine, dried over  $\text{NaSO}_4$  and filtered. Filtrate concentrated and used without further purification.

In a dried RB flask fitted with a stir bar under argon atmosphere was added aldehyde (0.30 g, 0.92 mmol) in MeOH (5 mL). Ohira-Bestmann reagent (0.35 g, 1.84 mmol) was added (turned yellow/green) and cooled to  $0\text{ }^\circ\text{C}$ . Powdered  $\text{K}_2\text{CO}_3$  (0.38 g, 2.76 mmol) added and stirred at  $0\text{ }^\circ\text{C}$  for 2 h, when TLC showed consumption of SM. Reaction diluted with brine (5 mL) and extracted with EtOAc (3 x 15 mL). Combined organic layer washed with brine, dried over  $\text{NaSO}_4$  and filtered. The filtrate was concentrated and purified by flash column chromatography ( $\text{SiO}_2$ , 10 g, 5% EtOAc/hexanes) to afford bicyclic alkyne **2b** as a white solid (0.13 g, 31%

yield 3 steps);  $^1\text{H}$  NMR (500 MHz,  $\text{CDCl}_3$ )  $\delta$  8.25 (s, 1H), 7.96 (d,  $J = 7.8$  Hz, 1H), 7.82 (d,  $J = 2.2$  Hz, 1H), 7.79 – 7.74 (m, 1H), 7.53 (dd,  $J = 8.4, 2.2$  Hz, 1H), 7.50 (t,  $J = 7.7$  Hz, 1H), 6.96 (d,  $J = 8.5$  Hz, 1H), 3.91 (s, 3H), 3.67 (d,  $J = 2.6$  Hz, 2H), 2.24 (t,  $J = 2.6$  Hz, 1H), 1.66 (s, 9H);  $^{13}\text{C}$  NMR (126 MHz,  $\text{CDCl}_3$ )  $\delta$  165.9, 156.6, 140.9, 132.7, 132.5, 130.7, 130.7, 130.7, 128.6, 127.8, 127.7, 127.7, 127.6, 127.6, 126.6, 125.0, 110.4, 81.8, 81.1, 70.7, 55.6, 28.2, 19.3; HRMS (DART  $[\text{M}]^+$ )  $m/z$  322.1578 (calculated for  $\text{C}_{21}\text{H}_{23}\text{O}_3$  322.1569).

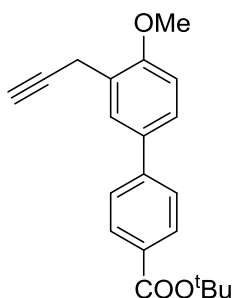

**4'-Methoxy-3'-prop-2-ynyl-biphenyl-4-carboxylic acid *tert*-butyl ester (2c).** In a dried RB flask fitted with a stir bar under argon atmosphere, methoxymethyl triphenylphosphonium chloride (1.37 g, 4.00 mmol) was dissolved in dry THF (10 mL) and cooled to 0 °C. Sodium *tert*-butoxide (0.39 g, 4.00 mmol) was added (reaction turned dark red) and stirred for 20 min. Aldehyde (0.50 g, 1.60 mmol) dissolved in dry THF (5 mL) was added (reaction turned orange). TLC showed SM consumption after 30 min. Reaction quenched with saturated  $\text{NH}_4\text{Cl}$  and extracted with EtOAc (3 x 15 mL). Combined organic layer washed with brine, dried over  $\text{NaSO}_4$  and filtered. Filtrate passed through a column of silica gel (10% EtOAc in hexanes) to afford a mixture of enol ether isomers, which were immediately hydrolyzed in the subsequent step.

In a dried RB flask fitted with a stir bar under argon atmosphere was added enol ether (0.50 g, 1.47 mmol) in MeCN (20 mL). Sodium iodide (0.26 g, 1.76 mmol) added and cooled to -20 °C. TMSI (0.19 g, 1.76 mmol) added, stirred at -20 °C for 30 min, when TLC showed SM consumption. Reaction diluted with EtOAc (20 mL) and Na<sub>2</sub>S<sub>2</sub>O<sub>3</sub> (10 mL), stirred until reaction warmed to rt. Organic layer separated and aqueous phase extracted with EtOAc (3 x 20 mL). Combined organic layers washed with brine, dried over NaSO<sub>4</sub> and filtered. Filtrate concentrated and used without further purification.

In a dried RB flask fitted with a stir bar under argon atmosphere was added aldehyde (0.34 g, 1.03 mmol) in MeOH (7 mL). Ohira-Bestmann reagent (0.40 g, 2.06 mmol) was added (turned yellow/green) and cooled to 0 °C. Powdered K<sub>2</sub>CO<sub>3</sub> (0.43 g, 3.09 mmol) added and stirred at 0 °C for 2 h, when TLC showed consumption of SM. Reaction diluted with brine (5 mL) and extracted with EtOAc (3 x 15 mL). Combined organic layer washed with brine, dried over NaSO<sub>4</sub> and filtered. The filtrate was concentrated and purified by flash column chromatography (SiO<sub>2</sub>, 12 g, 5% EtOAc/hexanes) to afford bicyclic alkyne **2c** as a white solid (0.23 g, 45% yield 3 steps); <sup>1</sup>H NMR (500 MHz, CDCl<sub>3</sub>) δ 8.09 (d, *J* = 8.2 Hz, 2H), 7.85 (d, 1H), 7.66 (d, *J* = 8.2 Hz, 2H), 7.52 (dd, *J* = 8.6, 2.4 Hz, 1H), 6.93 (d, *J* = 8.5 Hz, 1H), 3.89 (s, 3H), 3.67 (d, *J* = 2.7 Hz, 2H), 2.27 (t, *J* = 2.5 Hz, 1H), 1.66 (s, 9H); <sup>13</sup>C NMR (126 MHz, CDCl<sub>3</sub>) δ 165.8, 156.9, 156.9, 144.8, 132.4, 130.2, 129.9, 129.9, 127.8, 126.7, 126.4, 125.0, 125.0, 110.4, 81.7, 77.4, 77.1, 76.9, 70.9, 55.5, 28.3, 19.4; HRMS (DART [M]<sup>+</sup>) *m/z* 322.1539 (calculated for C<sub>21</sub>H<sub>23</sub>O<sub>3</sub> 322.1569).

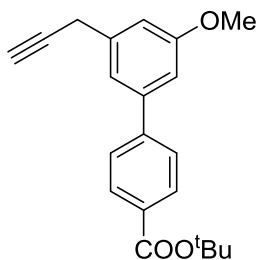

**3'-Methoxy-5'-prop-2-ynyl-biphenyl-4-carboxylic acid *tert*-butyl ester (2d).** In a dried RB flask fitted with a stir bar under argon atmosphere, methoxymethyl triphenylphosphonium chloride (1.76 g, 5.12 mmol) was dissolved in dry THF (12 mL) and cooled to 0 °C. Sodium *tert*-butoxide (0.49 g, 5.12 mmol) was added (reaction turned dark red) and stirred for 20 min. Aldehyde (0.64 g, 2.05 mmol) dissolved in dry THF (7 mL) was added (reaction turned orange). TLC showed SM consumption after 30 min. Reaction quenched with saturated NH<sub>4</sub>Cl and extracted with EtOAc (3 x 15 mL). Combined organic layer washed with brine, dried over NaSO<sub>4</sub> and filtered. Filtrate passed through a column of silica gel (10% EtOAc in hexanes) to afford a mixture of enol ether isomers, which were immediately hydrolyzed in the subsequent step.

In a dried RB flask fitted with a stir bar under argon atmosphere was added enol ether (0.56 g, 1.64 mmol) in MeCN (20 mL). Sodium iodide (0.27 g, 1.80 mmol) added and cooled to -20 °C. TMSCl (0.20 g, 1.80 mmol) added, stirred at -20 °C for 30 min, when TLC showed SM consumption. Reaction diluted with EtOAc (20 mL) and Na<sub>2</sub>S<sub>2</sub>O<sub>3</sub> (10 mL), stirred until reaction warmed to rt. Organic layer separated and aqueous phase extracted with EtOAc (3 x 20 mL). Combined organic layers washed with brine, dried over NaSO<sub>4</sub> and filtered. Filtrate concentrated and used without further purification.

In a dried RB flask fitted with a stir bar under argon atmosphere was added aldehyde (0.38 g, 1.15 mmol) in MeOH (7 mL). Ohira-Bestmann reagent (0.44 g, 2.30 mmol) was added (turned yellow/green) and cooled to 0 °C. Powdered K<sub>2</sub>CO<sub>3</sub> (0.48 g, 3.45 mmol) added and stirred at 0 °C for 2 h, when TLC showed consumption of SM. Reaction diluted with brine (5 mL) and extracted with EtOAc (3 x 15 mL). Combined organic layer washed with brine, dried over NaSO<sub>4</sub> and filtered. The filtrate was concentrated and purified by flash column chromatography (SiO<sub>2</sub>, 12 g, 5% EtOAc/hexanes) to afford bicyclic alkyne **2d** as a white solid (0.22 g, 34% yield 3 steps); <sup>1</sup>H NMR (500 MHz, CDCl<sub>3</sub>) δ 8.09 (d, *J* = 8.5 Hz, 2H), 7.67 (d, *J* = 8.5 Hz, 2H), 7.23 (s, 1H), 7.07 (s, 1H), 7.00 (s, 1H), 3.92 (s, 3H), 3.71 (d, *J* = 2.6 Hz, 2H), 2.27 (t, *J* = 2.7 Hz, 1H), 1.66 (s, 9H); <sup>13</sup>C NMR (126 MHz, CDCl<sub>3</sub>) δ 165.7, 160.3, 144.9, 141.9, 138.3, 131.1, 129.9, 127.0, 119.4, 113.1, 111.6, 81.6, 81.1, 70.9, 55.5, 28.3, 25.0. HRMS (DART [M]<sup>+</sup>) *m/z* 322.1572 (calculated for C<sub>21</sub>H<sub>23</sub>O<sub>3</sub> 322.1569).

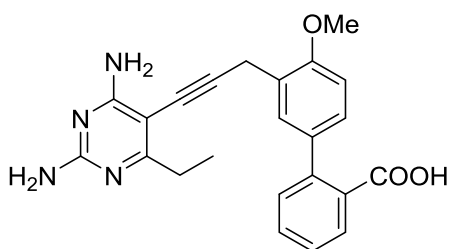

**6-Ethyl-5-[3-(2-methoxy-5-(2-carboxyphenyl)-phenyl)-prop-1-ynyl]-pyrimidine-2,4-diamine (3a)**. In a screw cap vial fitted with a stir bar and a septum, was added alkyne (0.10 g, 0.31 mmol), iodo-ethylpyrimidine (0.06 mg, 0.24 mmol), Pd(PPh<sub>3</sub>)<sub>2</sub>Cl<sub>2</sub> previously doped with 10% CuI by weight (0.01 g, 0.02 mmol), and KOAc (0.23 g, 2.38 mmol). DMF (3 mL) added and argon bubbled through the stirring solution for

10 min. Vial sealed and heated to 50 °C until complete by TLC (2-3 h). Dried in vacuo using toluene as an azeotrope. Residue washed with saturated sodium bicarbonate, extracted 3x with EtOAc. Organic layer washed with brine, dried over sodium sulfate, and filtered. Filtrate concentrated and purified by flash column chromatography (coupled product eluted with 90% EtOAc in hexanes). Material carried forward with no further purification.

TFA (0.5 mL) added to ester dissolved in DCM (1 mL). Stirred until complete by TLC (30 min). Reaction dried in vacuo to remove excess TFA. Column run on residue. Carboxylic acid eluted with 8% MeOH in DCM to give a white solid (0.043 g, 42% 2 step yield); <sup>1</sup>H NMR (500 MHz, DMSO-*d*<sub>6</sub>) δ 7.71 (d, *J* = 7.3 Hz, 1H), 7.56 (t, *J* = 7.5 Hz, 1H), 7.50 – 7.46 (m, 1H), 7.43 (t, *J* = 7.5 Hz, 1H), 7.36 (d, *J* = 7.6 Hz, 1H), 7.23 (dd, *J* = 8.3, 2.0 Hz, 1H), 7.06 (d, *J* = 8.4 Hz, 1H), 6.38 (bs, 2H), 6.21 (bs, 2H), 3.88 (s, 3H), 3.85 (s, 2H), 2.55 (q, *J* = 7.5 Hz, 2H), 1.04 (t, *J* = 7.5 Hz, 3H). <sup>13</sup>C NMR (126 MHz, DMSO) δ 170.3, 164.9, 156.4, 141.2, 133.5, 132.8, 131.2, 130.8, 129.5, 129.2, 128.2, 127.3, 125.1, 110.7, 95.7, 88.6, 76.7, 56.0, 29.1, 21.1, 12.8; HRMS (DART [M+H]<sup>+</sup>) *m/z* 403.1744 (calculated for C<sub>23</sub>H<sub>23</sub>N<sub>4</sub>O<sub>3</sub> 403.1770).

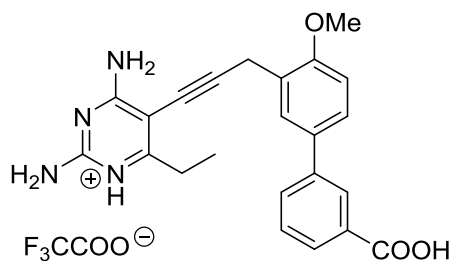

**6-Ethyl-5-[3-(2-methoxy-5-(3-carboxyphenyl)-phenyl)-prop-1-ynyl]-pyrimidine-2,4-diamine-trifluoroacetate salt (3b).** In a screw cap vial fitted with a stir bar and a septum, was added alkyne (0.10 g, 0.31 mmol), iodo-ethylpyrimidine (0.06 mg, 0.24

mmol), Pd(PPh<sub>3</sub>)<sub>2</sub>Cl<sub>2</sub> previously doped with 10% CuI by weight (0.01 g, 0.02 mmol), and KOAc (0.23 g, 2.38 mmol). DMF (3 mL) added and argon bubbled through the stirring solution for 10 min. Vial sealed and heated to 50 °C until complete by TLC (2-3 h). Dried in vacuo using toluene as an azeotrope. Residue washed with saturated sodium bicarbonate, extracted 3x with EtOAc. Organic layer washed with brine, dried over sodium sulfate, and filtered. Filtrate concentrated and purified by flash column chromatography (coupled product eluted with 90% EtOAc in hexanes). Material carried forward with no further purification.

TFA (0.5 mL) added to ester dissolved in DCM (1 mL). Stirred until complete by TLC (30 min). Reaction dried in vacuo to remove excess TFA. Column run on residue. Carboxylic acid eluted with 8% MeOH in DCM to give a white solid (0.48 g, 53% yield 2 steps). Compound isolated as the TFA salt; <sup>1</sup>H NMR (500 MHz, DMSO-*d*<sub>6</sub>) δ 8.48 (s, 1H), 8.16 (s, 1H), 7.91 (d, *J* = 7.7 Hz, 1H), 7.88 (d, *J* = 7.8 Hz, 1H), 7.78 – 7.75 (m, 1H), 7.73 (s, 1H), 7.67 – 7.63 (m, 1H), 7.59 (t, *J* = 7.7 Hz, 1H), 7.17 (d, *J* = 8.5 Hz, 1H), 3.93 (s, 2H), 3.91 (s, 3H), 2.71 (q, *J* = 7.5 Hz, 2H), 1.18 (t, *J* = 7.6 Hz, 3H); <sup>13</sup>C NMR (126 MHz, DMSO) δ 167.7, 164.9, 164.9, 159.0 (q, *J* = 31.3), 157.0, 154.5, 140.6, 131.9, 131.0, 129.8, 128.1, 127.6, 127.2, 127.0, 125.3, 111.8, 98.6, 91.8, 72.2, 56.2, 25.6, 21.0, 12.4; HRMS (DART [M+H]<sup>+</sup>) *m/z* 403.1748 (calculated for C<sub>23</sub>H<sub>23</sub>N<sub>4</sub>O<sub>3</sub> 403.1770).

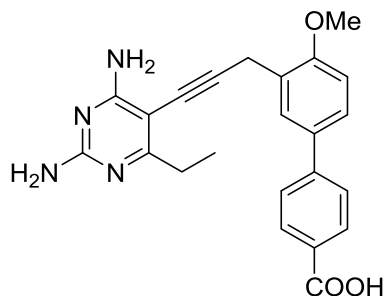

**6-Ethyl-5-[3-(2-methoxy-5-(4-carboxyphenyl)-phenyl)-prop-1-ynyl]-pyrimidine-**

**2,4-diamine (3c).** In a screw cap vial fitted with a stir bar and a septum, was added alkyne (0.10 g, 0.31 mmol), iodo-ethylpyrimidine (0.06 mg, 0.24 mmol), Pd(PPh<sub>3</sub>)<sub>2</sub>Cl<sub>2</sub> previously doped with 10% CuI by weight (0.01 g, 0.02 mmol), and KOAc (0.23 g, 2.38 mmol). DMF (3 mL) added and argon bubbled through the stirring solution for 10 min. Vial sealed and heated to 50 °C until complete by TLC (2-3 h). Dried in vacuo using toluene as an azeotrope. Residue washed with saturated sodium bicarbonate, extracted 3x with EtOAc. Organic layer washed with brine, dried over sodium sulfate, and filtered. Filtrate concentrated and purified by flash column chromatography (coupled product eluted with 90% EtOAc in hexanes). Material carried forward with no further purification.

TFA (1 mL) added to ester dissolved in DCM (1 mL). Stirred until complete by TLC (30 min). Reaction dried in vacuo to remove excess TFA. Column run on residue. Carboxylic acid eluted with 8% MeOH in DCM to give a white solid (0.039 g, 43% yield 2 steps); <sup>1</sup>H NMR (500 MHz, CDCl<sub>3</sub>: Methanol-*d*<sub>4</sub>) δ 8.08 (d, *J* = 8.4 Hz, 2H), 7.76 (d, *J* = 2.3 Hz, 1H), 7.68 (d, *J* = 8.4 Hz, 2H), 7.61 (dd, *J* = 8.5, 2.4 Hz, 1H), 7.10 (d, *J* = 8.6 Hz, 1H), 3.95 (s, 3H), 3.95 (s, 2H), 2.79 (q, *J* = 7.6 Hz, 2H), 1.28 (t, *J* = 7.6 Hz, 3H); <sup>13</sup>C NMR (126 MHz, DMSO) δ 171.8, 165.0, 161.6, 157.3, 144.2, 131.7,



130.4, 127.9, 127.7, 127.0, 126.5, 126.3, 111.7, 95.7, 88.5, 76.9, 56.2, 29.3, 21.1, 11.0; HRMS (DART [M+H]<sup>+</sup>) *m/z* 403.1746 (calculated for C<sub>23</sub>H<sub>23</sub>N<sub>4</sub>O<sub>3</sub> 403.1770).

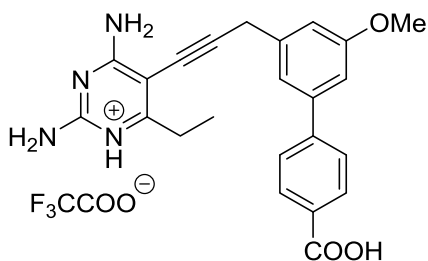

**6-Ethyl-5-[3-(3-methoxy-5-(4-carboxyphenyl)-phenyl)-prop-1-ynyl]-pyrimidine-**

**2,4-diamine-trifluoroacetate salt (3d).** In a screw cap vial fitted with a stir bar and a septum, was added alkyne (0.10 g, 0.31 mmol), iodo-ethylpyrimidine (0.06 mg, 0.24 mmol), Pd(PPh<sub>3</sub>)<sub>2</sub>Cl<sub>2</sub> previously doped with 10% CuI by weight (0.01 g, 0.02 mmol), and KOAc (0.23 g, 2.38 mmol). DMF (3 mL) added and argon bubbled through the stirring solution for 10 min. Vial sealed and heated to 50 °C until complete by TLC (2-3 h). Dried in vacuo using toluene as an azeotrope. Residue washed with saturated sodium bicarbonate, extracted 3x with EtOAc. Organic layer washed with brine, dried over sodium sulfate, and filtered. Filtrate concentrated and purified by flash column chromatography (coupled product eluted with 90% EtOAc in hexanes). Material carried forward with no further purification.

TFA (1 mL) added to ester dissolved in DCM (1 mL). Stirred until complete by TLC (30 min). Reaction dried in vacuo to remove excess TFA. Column run on residue. Carboxylic acid eluted with 8% MeOH in DCM to give as a white solid (0.045 g, 49% yield 2 steps). Compound isolated as the TFA salt; <sup>1</sup>H NMR (500 MHz, DMSO-*d*<sub>6</sub>) δ 7.5-7.0 (bs, 4H), 8.04 (d, *J* = 7.7 Hz, 2H), 7.81 (d, *J* = 7.7 Hz, 2H), 7.36 (s, 1H), 7.18 (s, 1H), 7.06 (s, 1H), 4.01 (s, 2H), 3.86 (s, 3H), 2.75 – 2.61 (m, 2H), 1.18 (t, *J* = 7.4

Hz, 3H);  $^{13}\text{C}$  NMR (126 MHz, DMSO)  $\delta$  167.6, 164.9, 160.5, 158.6 (q,  $J = 31.3$ ), 144.6, 141.1, 139.5, 130.4, 127.4, 119.5, 114.1, 111.1, 98.0, 90.8, 73.4, 55.8, 26.5, 26.0, 12.6; HRMS (DART  $[\text{M}+\text{H}]^+$ )  $m/z$  403.1777 (calculated for  $\text{C}_{23}\text{H}_{23}\text{N}_4\text{O}_3$  403.1770).

**Synthesis of 3S-(2-Methoxy-5-(4-carbomethoxyphenyl)-phenyl)-thiobutyric acid S-ethyl ester**

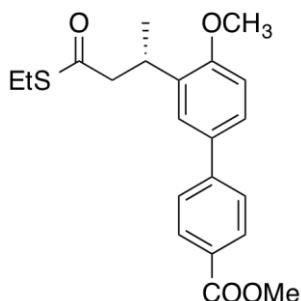

To 4-(Methoxycarbonyl)phenylboronic acid (680 mg, 3.78 mmol),  $\text{Pd}(\text{PPh}_3)_4$  (291 mg, 0.252 mmol), and  $\text{Cs}_2\text{CO}_3$  (1.06 g, 3.78 mmol) was added followed by 3S-(5-Bromo-2-methoxy-phenyl)-thiobutyric acid S-ethyl ester **4S** (400 mg, 1.26 mmol) dissolved in dioxane (9 mL). To the reaction mixture was added water (2.5 mL) and stirred at 89 °C for 14 h. Later the reaction mixture was quenched with water (10 mL) and extracted with EtOAc (3 x 30 mL). The combined organic extracts were dried ( $\text{Na}_2\text{SO}_4$ ) and concentrated. Purification by flash chromatography on silica gel (Hexane/EtOAc 80:20) provided 3S-(2-Methoxy-5-(4-carbomethoxyphenyl)-phenyl)-thiobutyric acid S-ethyl ester as a colorless semi-solid (390 mg, 83% yield);  $^1\text{H}$  NMR (500 MHz,  $\text{CDCl}_3$ )  $\delta$  8.12 (d,  $J = 8.4$  Hz, 2H), 7.66 (d,  $J = 8.4$  Hz, 2H), 7.50 (d,  $J = 8.4$ , 2.5 Hz, 1H), 7.46 (d,  $J = 2.2$  Hz, 1H), 6.98 (d,  $J = 8.4$  Hz, 1H), 3.98 (s, 3H), 3.94 (s, 3H), 3.79 (sextet,  $J = 7.0$  Hz, 1H), 3.02 (dd,  $J = 14.7$ , 5.9 Hz, 1H), 2.90 (q,  $J = 7.4$

Hz, 2H), 2.84 (dd,  $J = 14.6, 8.7$  Hz, 1H), 1.38 (d,  $J = 6.9$  Hz, 3H), 1.25 (t,  $J = 7.4$  Hz, 3H);  $^{13}\text{C}$  NMR (125 MHz,  $\text{CDCl}_3$ )  $\delta$  198.6, 167.1, 157.3, 145.5, 134.0, 132.2, 130.1, 128.2, 126.6, 126.2, 126.1, 111.0, 55.5, 52.1, 50.5, 31.2, 23.3, 19.7, 14.8; HRMS (DART,  $\text{M}^+\text{+H}$ )  $m/z$  373.1456 (calculated for  $\text{C}_{21}\text{H}_{25}\text{O}_4\text{S}$ , 373.1474).

**Synthesis of 3S-(3-Methoxy-5-(4-carbomethoxyphenyl)-phenyl)-thiobutyric acid S-ethyl ester**

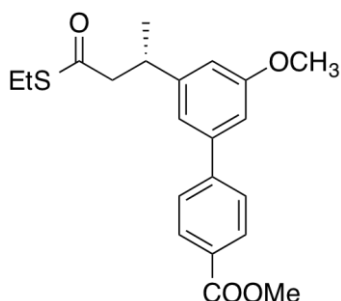

To 4-(Methoxycarbonyl)phenylboronic acid (680 mg, 3.78 mmol),  $\text{Pd}(\text{PPh}_3)_4$  (291 mg, 0.252 mmol), and  $\text{Cs}_2\text{CO}_3$  (1.06 g, 3.78 mmol) was added followed by 3S-(5-Bromo-3-methoxy-phenyl)-thiobutyric acid S-ethyl ester **5S** (400 mg, 1.26 mmol) dissolved in dioxane (9 mL). To the reaction mixture was added water (2.5 mL) and stirred at 89 °C for 14 h. Later the reaction mixture was quenched with water (10 mL) and extracted with EtOAc (3 x 30 mL). The combined organic extracts were dried ( $\text{Na}_2\text{SO}_4$ ) and concentrated. Purification by flash chromatography on silica gel (Hexane/EtOAc 80:20) provided 3S-(3-Methoxy-5-(4-carbomethoxyphenyl)-phenyl)-thiobutyric acid S-ethyl ester as a colorless semi-solid (402 mg, 86% yield);  $^1\text{H}$  NMR (500 MHz,  $\text{CDCl}_3$ )  $\delta$  8.10 (d,  $J = 8.2$  Hz, 2H), 7.65 (d,  $J = 8.2$  Hz, 2H), 7.08 (s, 1H), 7.00 (s, 1H), 6.82 (s, 1H), 3.93 (s, 3H), 3.85 (s, 3H), 3.42 (sextet,  $J = 7.0$  Hz, 1H), 2.87 (m, 4H), 1.36 (d,  $J = 7.0$  Hz, 3H), 1.21 (t,  $J = 7.3$  Hz, 3H);  $^{13}\text{C}$  NMR (125 MHz,

CDCl<sub>3</sub>)  $\delta$  197.9, 166.8, 160.2, 147.7, 145.6, 141.5, 130.0, 129.0, 127.1, 118.4, 112.4, 110.9, 55.3, 52.0, 37.1, 23.3, 21.5, 14.8; HRMS (DART, M<sup>++</sup>H)  $m/z$  373.1483 (calculated for C<sub>21</sub>H<sub>25</sub>O<sub>4</sub>S, 373.1474).

**Synthesis of 3S-(2-Methoxy-5-(4-carbomethoxyphenyl)-phenyl)-butyraldehyde**

**(6S)**

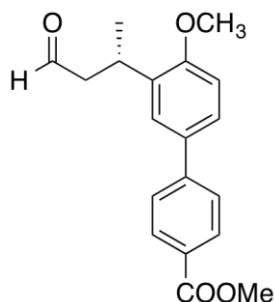

To 3S-(2-Methoxy-5-(4-carbomethoxyphenyl)-phenyl)-thiobutyric acid S-ethyl ester (203 mg, 0.649 mmol) dissolved in CH<sub>2</sub>Cl<sub>2</sub> (3 mL) was added 10% Pd/C (687 mg, 0.649 mmol Pd) followed by Et<sub>3</sub>SiH (0.310 mL, 1.95 mmol) and stirred vigorously at rt for 30-40 min. The reaction monitored by TLC and filtered through the celite and washed with CH<sub>2</sub>Cl<sub>2</sub> (2 x 20 mL). The solution was concentrated and purified by flash chromatography on silica gel (hexane/EtOAc 60:40) to yield **6S** as colorless oil (172 mg, 85% yield); <sup>1</sup>H NMR (500 MHz, CDCl<sub>3</sub>)  $\delta$  9.77 (t,  $J$  = 2.2 Hz, 1H), 8.11 (d,  $J$  = 8.5 Hz, 2H), 7.64 (d,  $J$  = 8.5 Hz, 2H), 7.48 (m, 2H), 6.97 (d,  $J$  = 8.3 Hz), 3.96 (s, 3H), 3.91 (s, 3H), 3.83 (sextet,  $J$  = 7.0 Hz, 1H), 2.82 (ddd,  $J$  = 16.3, 6.5, 2.1 Hz, 1H), 2.70 (ddd,  $J$  = 16.3, 7.8, 2.4 Hz, 1H), 1.40 (d,  $J$  = 7.0 Hz, 3H); <sup>13</sup>C NMR (125 MHz, CDCl<sub>3</sub>)  $\delta$  202.3, 167.0, 157.0, 145.4, 133.9, 132.4, 130.1, 128.3, 126.5, 126.3, 125.9, 111.0, 55.5, 52.0, 50.5, 28.0, 20.3; HRMS (DART, M<sup>++</sup>H)  $m/z$  313.1431 (calculated for C<sub>19</sub>H<sub>21</sub>O<sub>4</sub>, 313.1440).

## Synthesis of 3S-(3-Methoxy-5-(4-carbomethoxyphenyl)-phenyl)-butyraldehyde

(7S)

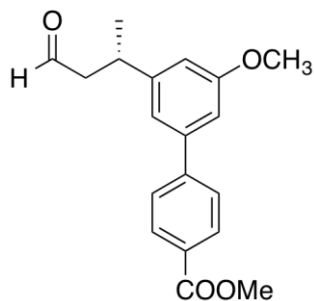

To 3S-(2-Methoxy-5-(4-carbomethoxyphenyl)-phenyl)-thiobutyric acid S-ethyl ester (400 mg, 1.07 mmol) dissolved in CH<sub>2</sub>Cl<sub>2</sub> (6 mL) was added 10% Pd/C (1.13 g, 1.07 mmol Pd) followed by Et<sub>3</sub>SiH (0.62 mL, 3.22 mmol) and stirred vigorously at rt for 30-40 min. The reaction monitored by TLC and filtered through the celite and washed with CH<sub>2</sub>Cl<sub>2</sub> (2 x 30 mL). The solution was concentrated and purified by flash chromatography on silica gel (hexane/EtOAc 60:40) to yield **7S** as colorless oil (300 mg, 89% yield); <sup>1</sup>H NMR (500 MHz, CDCl<sub>3</sub>) δ 9.76 (t, *J* = 1.8 Hz, 1H), 8.12 (d, *J* = 8.4 Hz, 2H), 7.66 (d, *J* = 8.4 Hz, 2H), 7.09 (dd, *J* = 1.3, 1.3 Hz, 1H), 7.01 (dd, *J* = 1.7, 1.7 Hz, 1H), 6.84 (dd, *J* = 1.7, 1.7 Hz, 1H), 3.96 (s, 3H), 3.88 (s, 3H), 3.44 (sextet, *J* = 7.0 Hz, 1H), 2.84 (ddd, *J* = 16.8, 6.8, 1.7 Hz, 1H), 2.72 (ddd, *J* = 16.8, 7.7, 2.0 Hz, 1H), 1.38 (d, *J* = 7.0 Hz, 3H); <sup>13</sup>C NMR (125 MHz, CDCl<sub>3</sub>) δ 201.5, 166.9, 160.3, 147.9, 145.5, 141.8, 130.1, 129.1, 127.2, 118.4, 112.5, 110.8, 55.4, 52.1, 51.6, 34.4, 22.1; HRMS (DART, M<sup>+</sup>+H) *m/z* 313.1430 (calculated for C<sub>19</sub>H<sub>21</sub>O<sub>4</sub>, 313.1440).

**Synthesis of 4-[4-Methoxy-3-(1*S*-methyl-prop-2-ynyl)-phenyl]-methylbenzoate  
(**8S**)**

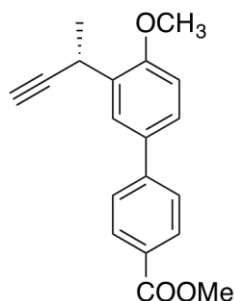

To (*S*)-aldehyde **6S** (0.14 g, 0.45 mmol) dissolved in DMF (2 mL) was added NfF (0.30 mL, 1.68 mmol) at -15 °C followed by the phosphazene base (0.75 mL, 2.46 mmol) and stirred vigorously at rt for 18 h. The reaction mixture was quenched with water (10 mL) and extracted with EtOAc (3 x 10 mL). The combined organic extracts were dried (Na<sub>2</sub>SO<sub>4</sub>) and concentrated. Purification by flash chromatography on silica gel (hexane/EtOAc 70:30) provided (*S*)-alkyne **8S** as white solid (0.11 g, 83 % yield); R-isomer [ $\alpha$ ]<sub>D</sub><sup>21</sup> = - 83.9 (c, 1.36, CHCl<sub>3</sub>)/ S-isomer [ $\alpha$ ]<sub>D</sub><sup>21</sup> = + 81.9 (c, 1.30, CHCl<sub>3</sub>); <sup>1</sup>H NMR (500 MHz, CDCl<sub>3</sub>)  $\delta$  8.14 (d, *J* = 8.5 Hz, 2H), 7.92 (d, *J* = 2.4 Hz, 1H), 7.70 (d, *J* = 8.5 Hz, 2H), 7.54 (dd, *J* = 8.5, 2.4 Hz, 1H), 6.97 (d, *J* = 8.5 Hz, 1H), 4.29 (dq, *J* = 7.0, 2.5 Hz, 1H), 3.98 (s, 3H), 3.93 (s, 3H), 2.32 (d, *J* = 2.5 Hz, 1H), 1.54 (d, *J* = 7.0 Hz, 3H); <sup>13</sup>C NMR (125 MHz, CDCl<sub>3</sub>)  $\delta$  167.1, 156.4, 145.4, 132.4, 131.6, 130.1, 128.3, 126.7, 126.6, 110.8, 87.3, 69.9, 55.6, 52.1, 25.6, 22.7; HRMS (DART, M<sup>+</sup>+H) *m/z* 295.1321 (calculated for C<sub>19</sub>H<sub>19</sub>O<sub>3</sub>, 295.1334).

## Synthesis of 4-[5-Methoxy-3-(1*S*-methyl-prop-2-ynyl)-phenyl]-methylbenzoate

(**9R**)

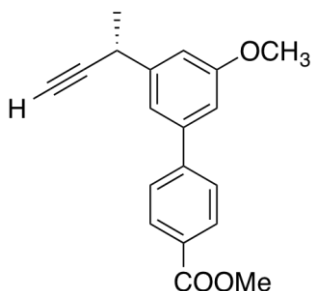

To (S)-aldehyde **7S** (0.30 g, 0.96 mmol) dissolved in DMF (4 mL) was added NfF (0.64 mL, 3.60 mmol) at -15 °C followed by the phosphazene base (1.60 mL, 5.28 mmol) and stirred vigorously at rt for 12 h. The reaction mixture was quenched with water (10 mL) and extracted with EtOAc (3 x 10 mL). The combined organic extracts were dried (Na<sub>2</sub>SO<sub>4</sub>) and concentrated. Purification by flash chromatography on silica gel (hexane/EtOAc 70:30) provided (R)-alkyne **9R** as white solid (197 mg, 70 % yield); R-isomer [ $\alpha$ ]<sub>D</sub><sup>21</sup> = + 13.4 (c, 1.09, CHCl<sub>3</sub>)/ S-isomer [ $\alpha$ ]<sub>D</sub><sup>21</sup> = - 8.7 (c, 1.17, CHCl<sub>3</sub>); <sup>1</sup>H NMR (500 MHz, CDCl<sub>3</sub>)  $\delta$  8.14 (d, *J* = 8.4 Hz, 2H), 7.69 (d, *J* = 8.4 Hz, 1H), 7.27 (dd, *J* = 1.3, 1.3 Hz, 1H), 7.06 (dd, *J* = 1.6, 1.6 Hz, 1H), 7.05 (dd, *J* = 1.6, 1.6 Hz, 1H), 3.98 (s, 3H), 3.92 (s, 3H), 3.86 (dq, *J* = 7.1, 2.5 Hz, 1H), 2.35 (d, *J* = 2.5 Hz, 1H), 1.61 (d, *J* = 7.1 Hz, 3H); <sup>13</sup>C NMR (125 MHz, CDCl<sub>3</sub>)  $\delta$  166.9, 160.3, 145.5, 144.9, 141.7, 130.1, 129.1, 127.2, 118.5, 112.4, 111.4, 86.7, 70.6, 55.4, 52.1, 31.8, 24.2; HRMS (DART, M<sup>+</sup>+H) *m/z* 295.1316 (calculated for C<sub>19</sub>H<sub>19</sub>O<sub>3</sub>, 295.1334).

## Synthesis of 6-Ethyl-5-[3S-(2-methoxy-5-(4-carbomethoxyphenyl)-phenyl)-but-1-ynyl]-pyrimidine-2,4-diamine

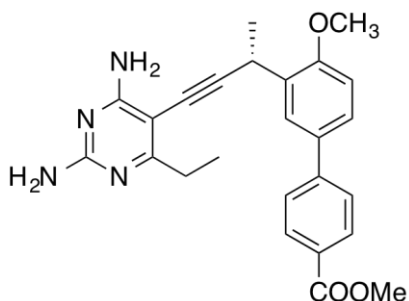

To (S)-alkyne **8S** (0.040 g, 0.136 mmol), iodo-ethyl pyrimidine (0.027 g, 0.104 mmol), KOAc (102 mg, 1.04 mmol) and PdCl<sub>2</sub>(PPh<sub>3</sub>)<sub>2</sub> (6.0 mg, 0.0083 mmol) previously doped with 10% CuI was added followed by DMF (2.0 mL) and stirred at 70 °C for 6 h. The reaction mixture was quenched with saturated NaHCO<sub>3</sub> (5 mL) and extracted with (4 x 10 mL) EtOAc. The combined organic layers concentrated by azeotroping with toluene (3 x 10 mL) and purified by gradient flash chromatography (100 % EtOAc followed by 1% MeOH in CH<sub>2</sub>Cl<sub>2</sub>) to yield coupled pyrimidine as pale yellow solid (30 mg); <sup>1</sup>H NMR (500 MHz, CDCl<sub>3</sub>) δ 8.12 (d, *J* = 8.4 Hz, 2H), 7.89 (d, *J* = 2.4 Hz, 1H), 7.67 (d, *J* = 8.4 Hz, 2H), 7.56 (dd, *J* = 8.4, 2.4 Hz, 1H), 7.01 (d, *J* = 8.5 Hz, 1H), 5.16 (br s, 2H), 4.84 (br s, 2H), 4.51 (q, *J* = 7.0 Hz, 1H), 3.98 (s, 3H), 3.97 (s, 3H), 2.76 (q, *J* = 7.6 Hz, 2H), 1.62 (d, *J* = 7.0 Hz, 3H), 1.27 (t, *J* = 7.6 Hz, 3H); <sup>13</sup>C NMR (125 MHz, CDCl<sub>3</sub>) δ 173.3, 167.0, 164.4, 160.7, 156.4, 145.2, 132.5, 132.1, 130.1, 128.4, 126.7, 126.6, 126.5, 110.9, 101.8, 90.8, 74.8, 55.6, 52.1, 29.7, 27.1, 22.9, 12.5; HRMS (DART, M<sup>++</sup>H) *m/z* 431.2078 (calculated for C<sub>25</sub>H<sub>27</sub>N<sub>4</sub>O<sub>3</sub>, 431.2083).



**Synthesis of 6-Ethyl-5-[3S-(2-methoxy-5-(4-carboxyphenyl)-phenyl)-but-1-ynyl]-pyrimidine-2,4-diamine-acetate salt (10S)**

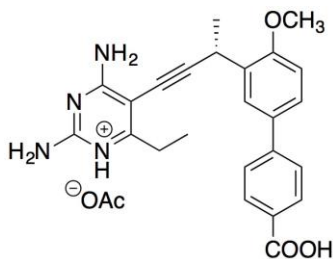

To coupled pyrimidine (30 mg, 0.069 mmol) dissolved in MeOH (1.4 mL) and THF (0.15 mL) was added LiOH (10.0 mg, 0.418 mmol) dissolved in water (0.45 mL) and stirred at 32 °C for 24 h. The reaction mixture was quenched with saturated NH<sub>4</sub>Cl and extracted with EtOAc (4 x 10 mL). The combined organic layers concentrated and purified by gradient flash chromatography (5-10% MeOH in CH<sub>2</sub>Cl<sub>2</sub> followed by 1% AcOH + 9 % MeOH in CH<sub>2</sub>Cl<sub>2</sub>) to yield acid **10S** as white solid (12 mg, 28% over 2 steps); R-isomer  $[\alpha]_{D}^{21} = -63.2$  (c, 0.33, DMSO-d<sub>6</sub>)/ S-isomer  $[\alpha]_{D}^{21} = +59.1$  (c, 0.30, DMSO-d<sub>6</sub>); <sup>1</sup>H NMR (500 MHz, DMSO-d<sub>6</sub>) δ 7.97 (d, *J* = 8.0 Hz, 2H), 7.85 (d, *J* = 2.2 Hz, 1H), 7.57 (m, 3H), 7.12 (d, *J* = 8.5 Hz, 1H), 6.19 (br s, 2H), 6.04 (s, 2H), 4.42 (q, *J* = 7.0 Hz, 1H), 3.91 (s, 3H), 2.61 (q, *J* = 7.5 Hz, 2H), 1.52 (d, *J* = 7.0 Hz, 3H), 1.14 (t, *J* = 7.5 Hz, 3H); <sup>13</sup>C NMR (125 MHz, DMSO-d<sub>6</sub>) δ 176.6, 172.1, 164.8, 161.7, 156.1, 141.3, 133.0, 132.2, 130.2, 126.6, 126.4, 125.5, 112.1, 101.2, 88.6, 75.9, 56.2, 29.3, 27.1, 24.2, 23.4, 12.8; HRMS (DART, M<sup>+</sup>+H) *m/z* 417.1908 (calculated for C<sub>24</sub>H<sub>25</sub>N<sub>4</sub>O<sub>3</sub>, 417.1927).

**Synthesis of 6-Ethyl-5-[3*S*-(3-methoxy-5-(4-carboxyphenyl)-phenyl)-but-1-ynyl]-pyrimidine-2,4-diamine (**11*R***)**

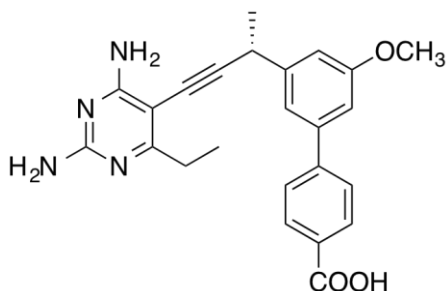

To (R)-alkyne **9*R*** (0.040 g, 0.136 mmol), iodo-ethyl pyrimidine (0.027 g, 0.104 mmol), KOAc (102 mg, 1.04 mmol) and PdCl<sub>2</sub>(PPh<sub>3</sub>)<sub>2</sub> (6.0 mg, 0.0083 mmol) previously doped with 10% CuI was added followed by DMF (2.0 mL) and stirred at 70 °C for 6 h. The reaction mixture was quenched with saturated NaHCO<sub>3</sub> (5 mL) and extracted with (4 x 10 mL) EtOAc. The combined organic layers concentrated by azeotrope with toluene (3 x 10 mL) and purified by gradient flash chromatography (100 % EtOAc followed by 1% MeOH in CH<sub>2</sub>Cl<sub>2</sub>) to yield coupled pyrimidine as pale yellow solid (40 mg); To coupled pyrimidine (40 mg, 0.093 mmol) dissolved in MeOH (1.6 mL) and THF (0.2 mL) was added LiOH (13.4 mg, 0.56 mmol) dissolved in water (0.6 mL) and stirred at 32 °C for 24 h. The reaction mixture was quenched with saturated NH<sub>4</sub>Cl and extracted with EtOAc (4 x 10 mL). The combined organic layers concentrated and purified by gradient flash chromatography (5-10% MeOH in CH<sub>2</sub>Cl<sub>2</sub> followed by 1% AcOH + 9 % MeOH in CH<sub>2</sub>Cl<sub>2</sub>) to yield acid **11*R*** as white solid (24 mg, 55% over 2 steps); R-isomer [α]<sub>D</sub><sup>22</sup> = - 6.6 (c, 0.85, DMSO-d<sub>6</sub>)/ S-isomer [α]<sub>D</sub><sup>22</sup> = + 5.83 (c, 0.19, DMSO-d<sub>6</sub>); <sup>1</sup>H NMR (500 MHz, CDCl<sub>3</sub>) δ 8.04 (d, *J* = 7.5 Hz, 2H), 7.67 (d, *J* = 7.5 Hz, 2H), 7.37 (s, 1H), 7.11 (s, 1H), 7.05 (s, 1H), 6.24 (br

s, 2H), 6.16 (br s, 2H), 4.16 (q,  $J = 7.0$  Hz, 1H), 3.85 (s, 3H), 2.58 (q,  $J = 7.5$  Hz, 2H), 1.56 (d,  $J = 7.0$  Hz, 3H), 1.13 (t,  $J = 7.5$  Hz, 3H);  $^{13}\text{C}$  NMR (125 MHz,  $\text{CDCl}_3$ )  $\delta$  172.1, 164.7, 161.7, 160.4, 146.4, 141.9, 130.3, 126.5, 118.2, 112.4, 110.9, 100.9, 88.3, 76.6, 55.7, 32.8, 29.4, 25.1, 12.9; HRMS (DART,  $\text{M}^+\text{+H}$ )  $m/z$  417.1973 (calculated for  $\text{C}_{24}\text{H}_{25}\text{N}_4\text{O}_3$ , 417.1927).

### HPLC Purity

Purity analysis were performed with a reversed phase high performance liquid chromatography on a Shimadzu Prominence 20 instrument fitted with a Luna 5 $\mu$  C18(2) 100 Å column (5  $\mu\text{M}$ , 4.6 mm x 250 mm, Phenomenex) and using UV diode array detection at 254 nm. Two separate determinations (Method A: isocratic: 40/60/0.1 MeCN/ $\text{H}_2\text{O}$ /TFA and Method B: isocratic: 60/40/0.1 MeOH/ $\text{H}_2\text{O}$ /TFA or 80/20/0.1 MeOH/ $\text{H}_2\text{O}$ /TFA) were made to determine compound purity. Flow rate was 1.0 mL/min for Method A and 1.0 mL/min for Method B. Compounds were diluted in HPLC grade methanol and filtered prior to analysis. Sample concentrations were 1 mg/ml. All final tested compounds were at least 95% pure according to both methods.

## Biological Supplemental Information

**Table S1.** Enzyme Inhibition Values with Standard Deviations

| <b>Cmpd</b> | <b>R<sub>P</sub></b> | <b>R<sub>1</sub></b> | <b>R<sub>2</sub></b> | <b>Ar</b>      | <b>Sa K<sub>i</sub> (nM)</b> | <b>Ec K<sub>i</sub> (nM)</b> | <b>Hu K<sub>i</sub> (nM)</b> |
|-------------|----------------------|----------------------|----------------------|----------------|------------------------------|------------------------------|------------------------------|
| <b>3a</b>   | H                    | OCH <sub>3</sub>     | H                    | <i>o</i> -COOH | 53.47 ± 4.5                  | 2.12±0.09                    | 2494±46                      |
| <b>3b</b>   | H                    | OCH <sub>3</sub>     | H                    | <i>m</i> -COOH | 23.38±1.2                    | 5.72±0.22                    | 346±13                       |
| <b>3c</b>   | H                    | OCH <sub>3</sub>     | H                    | <i>p</i> -COOH | 4.8 ±1.5                     | 0.979±0.07                   | 200±7                        |
| <b>3d</b>   | H                    | H                    | OCH <sub>3</sub>     | <i>p</i> -COOH | 1.64±0.09                    | 5.52±0.09                    | 158±9                        |
| <b>10S</b>  | S-CH <sub>3</sub>    | OCH <sub>3</sub>     | H                    | <i>p</i> -COOH | 5.51±0.3                     | 1.93±0.22                    | 376.6±21                     |
| <b>10R</b>  | R-CH <sub>3</sub>    | OCH <sub>3</sub>     | H                    | <i>p</i> -COOH | 32.2±2.9                     | 3.14±0.44                    | 451±11                       |
| <b>11R</b>  | R-CH <sub>3</sub>    | H                    | OCH <sub>3</sub>     | <i>p</i> -COOH | 1.34±0.10                    | 0.914±0.02                   | 234.2±14                     |
| <b>11S</b>  | S- CH <sub>3</sub>   | H                    | OCH <sub>3</sub>     | <i>p</i> -COOH | 2.09±0.15                    | 1.81±0.11                    | 388±23                       |
| <b>TMP</b>  |                      |                      |                      |                | 3.43 ±0.45                   | 0.22±02                      | 45738.5±0.6                  |

**Table S2.** Data collection and structure refinement statistics

|                                                          | Sa(WT):NADPH:3c                                                  | Sa(WT):NADPH:3d                           |
|----------------------------------------------------------|------------------------------------------------------------------|-------------------------------------------|
| PDB ID                                                   | 5HF0                                                             | 5HF2                                      |
| Space group                                              | <i>P6<sub>1</sub>22</i>                                          | <i>P6<sub>1</sub>22</i>                   |
| No. monomers in asymmetric unit                          | 1                                                                | 1                                         |
| Unit cell ( <i>a</i> , <i>b</i> , <i>c</i> in Å)         | 79.09, 79.09, 107.93<br>90.0, 90.0, 120.0                        | 79.02, 79.02, 108.25<br>90.0, 90.0, 120.0 |
| Resolution (Å)                                           | 32.65-2.24 (2.28-2.24)                                           | 25.15-1.81 (1.87-1.81)                    |
| Completeness % (last shell, %)                           | 100 (99.9)                                                       | 99.8 (100)                                |
| Unique reflections                                       | 10,059                                                           | 18,798                                    |
| Redundancy (last shell)                                  | 14 (14.2)                                                        | 12.32 (12.03)                             |
| R <sub>sym</sub> , (last shell)                          | 0.055 (0.144)                                                    | 0.110 (0.644)                             |
| $\langle I/\sigma \rangle$ (last shell)                  | 68.5 (31.9)                                                      | 11.7 (2.3)                                |
| R-factor/R <sub>free</sub>                               | 0.1703/0.2167                                                    | 0.1991/0.2322                             |
| No. of atoms (protein, ligands, solvent)                 | 1,499                                                            | 1,489                                     |
| Rms deviation bond lengths (Å), angles (deg)             | 0.008, 1.912                                                     | 0.009, 1.810                              |
| Average B factor for protein (Å <sup>2</sup> )           | 22.34                                                            | 28.01                                     |
| Average B factor for ligand (Å <sup>2</sup> )            | 17.46 $\alpha$ -NADPH<br>16.91 $\beta$ -NADPH<br>31.29 Inhibitor | 24.65 $\alpha$ -NADPH<br>24.93 Inhibitor  |
| Average B factor for solvent molecules (Å <sup>2</sup> ) | 25.25                                                            | 35.10                                     |
| Residues in most favored regions (%) <sup>a</sup>        | 96.86                                                            | 98.73                                     |
| Residues in additional allowed regions (%) <sup>a</sup>  | 3.14                                                             | 1.27                                      |
| Residues in disallowed regions (%) <sup>a</sup>          | 0                                                                | 0                                         |
| Collection Location                                      | SSRL Beamline 7-1                                                | Rigaku HighFlux-007                       |

**Table S3.** Minimum Bactericidal Concentrations

| Compound   | <i>S. aureus</i><br>MIC<br>( $\mu\text{g/mL}$ ) | <i>S. aureus</i><br>MBC<br>( $\mu\text{g/mL}$ ) |
|------------|-------------------------------------------------|-------------------------------------------------|
| <b>3d</b>  | 0.0195                                          | 0.0391                                          |
| <b>11R</b> | 0.0098                                          | 0.0195                                          |
| <b>11S</b> | 0.0098                                          | 0.0195                                          |

**Table S4.** MIC values ( $\mu\text{g/mL}$ ) in *E. coli* wild-type and *E. coli*  $\Delta\text{acrB}$ 

| Compound   | <i>E. coli</i> BW25113 | JW0451 |
|------------|------------------------|--------|
| <b>3a</b>  | >32                    | >32    |
| <b>3b</b>  | >20                    | >20    |
| <b>3c</b>  | >20                    | >20    |
| <b>3d</b>  | >20                    | >20    |
| <b>10S</b> | >20                    | >20    |
| <b>10R</b> | 20                     | 20     |
| <b>11R</b> | 10                     | 5      |
| <b>11S</b> | 10                     | 10     |
| <b>TMP</b> | 0.3125                 | 0.0391 |
| <b>MTX</b> | >40                    | >40    |

In order to examine whether the COOH-PLAs are subject to efflux by the common AcrB efflux pump, we compared MIC values in a parent *E. coli* strain with those in a strain in which AcrB is deleted (JW0451) (Table S4). As the MIC values against the JW0451 strain are similar to the parent strain and not the NR698 strain (Table 1), it is likely that the compounds are not subject to efflux by AcrB.

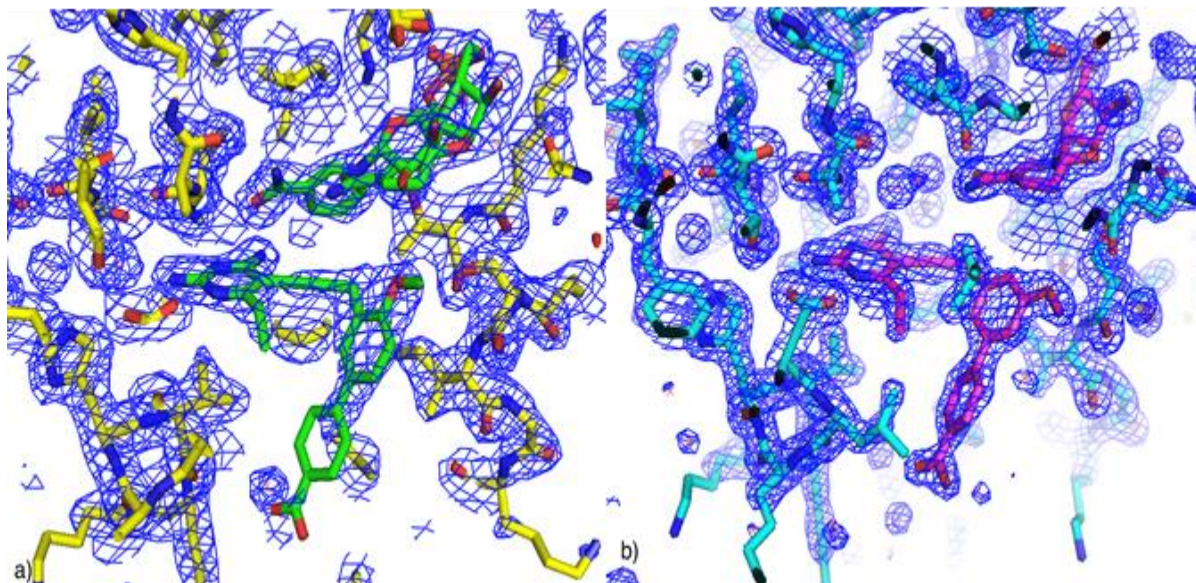

**Figure S1:** Electron density ( $2F_o-F_c$ ) of the active site residues. Panel a) shows density for the Sa(WT)DHFR:NADPH:**3c**, shown at  $1.0\sigma$  and panel b) density for the Sa(WT)DHFR:NADPH:**3d**, shown at  $1.5\sigma$ .

## Materials and Methods

### Protein Expression and Purification

Recombinant SaDHFR and EcDHFR in PET-41a(+) were over-expressed in *E. coli* BL21 (DE3) (Invitrogen) cells and purified using nickel affinity chromatography (5Prime) using previously reported conditions.<sup>1</sup> Protein was desalted using a PD-10 column (GE Healthcare) into buffer containing 20 mM Tris pH 7.0, 20 % glycerol, 0.1 mM EDTA, 2 mM DTT, the protein was flash frozen and stored in aliquots at -80 °C.

Recombinant HuDHFR purified using methotrexate affinity chromatography according to previously reported conditions.<sup>2</sup>

### Enzymatic Assays

#### *Sa*, *Ec*, and human DHFR Assays

IC<sub>50</sub> values for *Sa*, *Ec* and human DHFR enzymes were determined using enzyme inhibition assays by monitoring the rate of NADPH oxidation by DHFR via absorbance at 340 nM. The reaction was performed at room temperature in buffer containing 20 mM TES pH 7.0, 50 mM KCl, 0.5 mM EDTA, 10 mM β-ME and 1mg/mL BSA with 0.1 mM NADPH and 2 μg/mL enzyme. Inhibitor in DMSO was added to the enzyme/NADPH mixture and incubated for 5 minutes prior to the addition of 0.1 mM dihydrofolate in 50 mM TES. T h e e n z y m a t i c a c t i v i t y i s determined via Equation 1 and the IC<sub>50</sub> is determined using Equation 2.

<sup>1</sup> Frey, K. M., et al. (2009) Crystal Structure of Wild-type and Mutant Methicillin-resistant *Staphylococcus aureus* Dihydrofolate Reductase Reveal an Alternate Conformation of NADPH That May Be Linked to Trimethoprim Resistance. *J. Mol. Biol.* 387, 1289-1309.

<sup>2</sup> Kristen Lamb, et al. (2013) Elucidating Features that Drive the Design of Selective Antifolates Using Crystal Structures of Human Dihydrofolate Reductase. *Biochemistry*, 52(41), 7318-7326.



$$Activity = \left( \frac{(A_2 - A_1) \cdot 0.041}{(r_1 - r_0)} \right) / 60 \quad (1)$$

Where 0.041 is a term derived by the absorbance coefficient of NADPH,  $\epsilon = 6.2 \times 10^3$  Lmol<sup>-1</sup>cm<sup>-1</sup>.

$$IC_{50} (nM) = \left( \frac{(Inh. / volume / (100 - \% Activity)) \cdot 50}{(550)} \right) \cdot Inh. Conc. \quad (2)$$

The assay was performed in triplication and average IC<sub>50</sub> and the standard deviation from the mean are reported. The IC<sub>50</sub> values were converted to K<sub>i</sub> using K<sub>M</sub> values of Sa DHFR of 17.5 μM<sup>3</sup>, Ec DHFR of 1.1 μM<sup>4</sup> and Human DHFR of 30 μM<sup>5</sup>.

## Cell Based Assays

### *S. aureus* MICs

Minimum inhibitory concentrations were determined according to Clinical and Laboratory Standards Institute's guideline for Standard Micro-dilution broth assay using a final inoculum of 5 x 10<sup>5</sup> CFU/mL of ATCC strain 43300 in Isosensitest Broth (Oxoid). The MIC was defined as the lowest concentration of inhibitor to visually inhibit growth. Growth was monitored at A<sub>600</sub> after 18h of incubation at 37°C. MICs were confirmed, colorimetrically, using Presto Blue (Life Technologies).

### *E. coli*

Minimum inhibitory concentrations were determined using *E. coli* (ATCC 25922) and the microdilution broth assay with an inoculum of 1 x 10<sup>5</sup> CFU/mL in Isosensitest Broth (Oxoid). Growth was monitored at A<sub>600</sub> using the Alamar Blue assay; the MIC

<sup>3</sup> Reeve, S. M., et al. (2015) Protein Design and algorithms predict viable resistance to an experimental antifolate. *PNAS*, 112(3), 749-754.

<sup>4</sup> Iwakura, M., Tanaka, T. (1992) Dihydrofolate Reductase from *Bacillus subtilis* and its Artificial Derivatives: Expression, Purification, and Characterization. *J. Biochem.* 111, 638-642.

<sup>5</sup> Blakely, R. L. (1995) Eukaryotic dihydrofolate reductase. *Adv. Enzymol. Relat. Mol. Biol.*, 70, 23-102.

is defined as the lowest concentration of inhibitor to completely inhibit growth. Strains *E. coli* BW25113 and JW0451 were obtained from the Coli Genetic Stock Center, Yale University; strain NR698 was a gift from Dr. Thomas Silhavy (Princeton) and Dr. Daniel Kahne (Harvard); cell growth inhibition was evaluated using similar procedures as *E. coli* ATCC 25922.

### **CYP Inhibition**

Human Cytochrome P450 3A4 and 2D6 inhibition assays were run in 96-well microtiter plates using CYP3A4/BQ and CYP2D6/AMMC High Throughput Inhibitor Screening Kits (Gentest, Woburn, MA). Briefly, the ability to inhibit CYP catalytic activity was measured by following the presence of a fluorescent substrate. Inhibitor concentrations ranged from 0.02 to 50  $\mu$ M. Reactions were terminated after 30 minutes by addition of 75  $\mu$ L of a 4:1 acetonitrile/0.5 M Tris base solution. The BQ (CYP3A4 substrate) metabolite 7-hydroxyquinoline was measured at 409 nm excitation and 530 nm. The AMMC (CYP2D6 substrate) metabolite 3-[2-(N,N-diethylamino)ethyl]-7-hydroxy-4-methylcoumarin hydrochloride metabolite was measured at 390 nm excitation and 460 nm emission. IC<sub>50</sub> values were calculated via linear interpolation with inhibitor concentrations and corresponding percent inhibition values.

### **Microsomal stability**

Compounds (0.5  $\mu$ g/ml) were incubated with mouse liver microsomes (0.5 mg/mL; MLM; BD Biosciences, San Jose, CA) in 0.1 M potassium phosphate buffer (pH 7.4) and 200  $\mu$ g/ml HPMC A4M in the presence of an NADPH regenerating system at 37°C. The NADPH regenerating system consisted of NADP<sup>+</sup> (1.3 mM), glucose 6-

phosphate (3.3 mM), and glucose-6-phosphate dehydrogenase (0.5 U/mL). The metabolic reaction was initiated by the addition of microsomes and quenched by the addition of an equal volume of ice-cold acetonitrile at seven time points: 0, 10, 20, 30, 40, 60, and 90 minutes. Samples were centrifuged at 15,000 rpm for 10 minutes, supernatants were collected and spiked with an internal standard (diltiazem, 500 ng/mL) then analyzed using a Shimadzu Prominence 20 high-performance liquid chromatography (HPLC) instrument (Shimadzu, Kyoto, Japan) fitted with a Luna 5  $\mu\text{m}$  C18(2) 100Å column (5  $\mu\text{M}$ , 4.6  $\times$  250 mm; Phenomenex, Torrance, CA) and a UV diode array detection at 254 nm. The area under the curve for the parent compound determined and normalized using the internal standard. The amount of parent compound remaining was determined using a standard curve. Data was plotted and the metabolic half-life was calculated following first order kinetics.

### **SaDHFR Crystallization**

#### *SaDHFR:NADPH:3c*

Purified SaDHFR at 18 mg/mL protein was co-crystallized with 2 mM NADPH and 1 mM **3c** in DMSO via the hanging drop method. The mixture of protein and cofactor was incubated on ice for 3 hours. Equal volumes of protein solution were added to an optimized buffer solution containing 0.1 M MES, pH 5.5, 0.2 M sodium acetate, 17% PEG 10,000 and 12.5% gamma-butyrolactone. When stored at 4°C, crystals typically formed within 7 days. Crystals were harvested and frozen in cryo-protectant buffer containing 25% glycerol. Data were collected remotely on beamline 7-1 at Stanford Synchrotron Radiation Lightsource, SLAC National Accelerator Laboratory. Data were indexed and scaled using HKL2000. Phaser was used to identify

molecular replacement solutions using PDB ID: 3F0Q as a probe. Coot and Phenix were used for structure refinement until acceptable  $R_{\text{Work}}$  and  $R_{\text{Free}}$  were achieved.

### *SaDHFR:NADPH:3d*

Purified SaDHFR was co-crystallized with 2 mM NADPH and 1mM **3d** in DMSO via hanging drop method. Crystallization details were similar to those used above except for a change in buffer to 0.1M MES, pH 5.0. Data were collected on the Rigaku Highflux Homelab system at the University of Connecticut's Protein X-Ray Crystallography Facility. Data were indexed and scaled using Structure Studio (d\*Trek). Similar to above, Phaser<sup>6</sup> was used for molecular replacement; Coot and Phenix<sup>7</sup> were used for structure refinement.

### **Bacteriostatic/Bactericidal Determination**

The minimum bactericidal concentrations were determined by plating 20  $\mu\text{L}$  of culture on non-antibiotic LB agar at 1x, 2x, 4x and 8x MIC when MIC was determined using an inoculum of  $1 \times 10^5$  CFU/mL. The MBC is defined as the concentration there is a  $\geq 99\%$  decrease of bacteria. Compounds with a MBC/MIC  $< 4$  are considered bactericidal.<sup>8</sup>

<sup>6</sup> McCoy A. J. (2007) Solving structures of protein complexes by molecular replacement with Phaser *Acta Crystallogr. D. Biol. Crystallogr.* 63 (pt1): 32-41.

<sup>7</sup> Adams P. D., et al. (2010) PHENIX: A comprehensive Python-based system for macromolecular structure solution. *Acta Crystallogr. D. Biol. Crystallogr.* 66 (Pt 2): 213-221.

<sup>8</sup> Pankey GA and Sabath LD. (2004) Clinical Relevance of Bacteriostatic versus Bactericidal Mechanisms of Action its Treatment of Gram-Positive Bacterial Infections. *Clinical Infectious Diseases*, 38:864-70.

## **Human cell toxicity assays**

Adherent cell lines were maintained in Eagle's Minimal Essential Media with 2 mM glutamine and Earle's Balanced Salt Solution adjusted to contain 1.5 g/L sodium bicarbonate, 0.1 mM non-essential amino acids, 1 mM sodium pyruvate and 10 % fetal calf serum. Fetal calf serum used in these assays was lot matched throughout. All cultures were maintained under a humidified 5 % CO<sub>2</sub> atmosphere at 37 °C, had media refreshed twice weekly and were subcultured by trypsinization and resuspension at a ratio of 1:5 each week. Toxicity assays were conducted between passages 10 – 20. Target compound toxicity was measured by incubating the test compound with the cells for four hours, washing the cells and finally treating the cells with Alamar Blue. After 12 – 24 hours the fluorescence of the reduced dye was measured. Fluorescence intensity as a function of test compound concentration was fit to the Fermi equation to estimate IC<sub>50</sub> values.

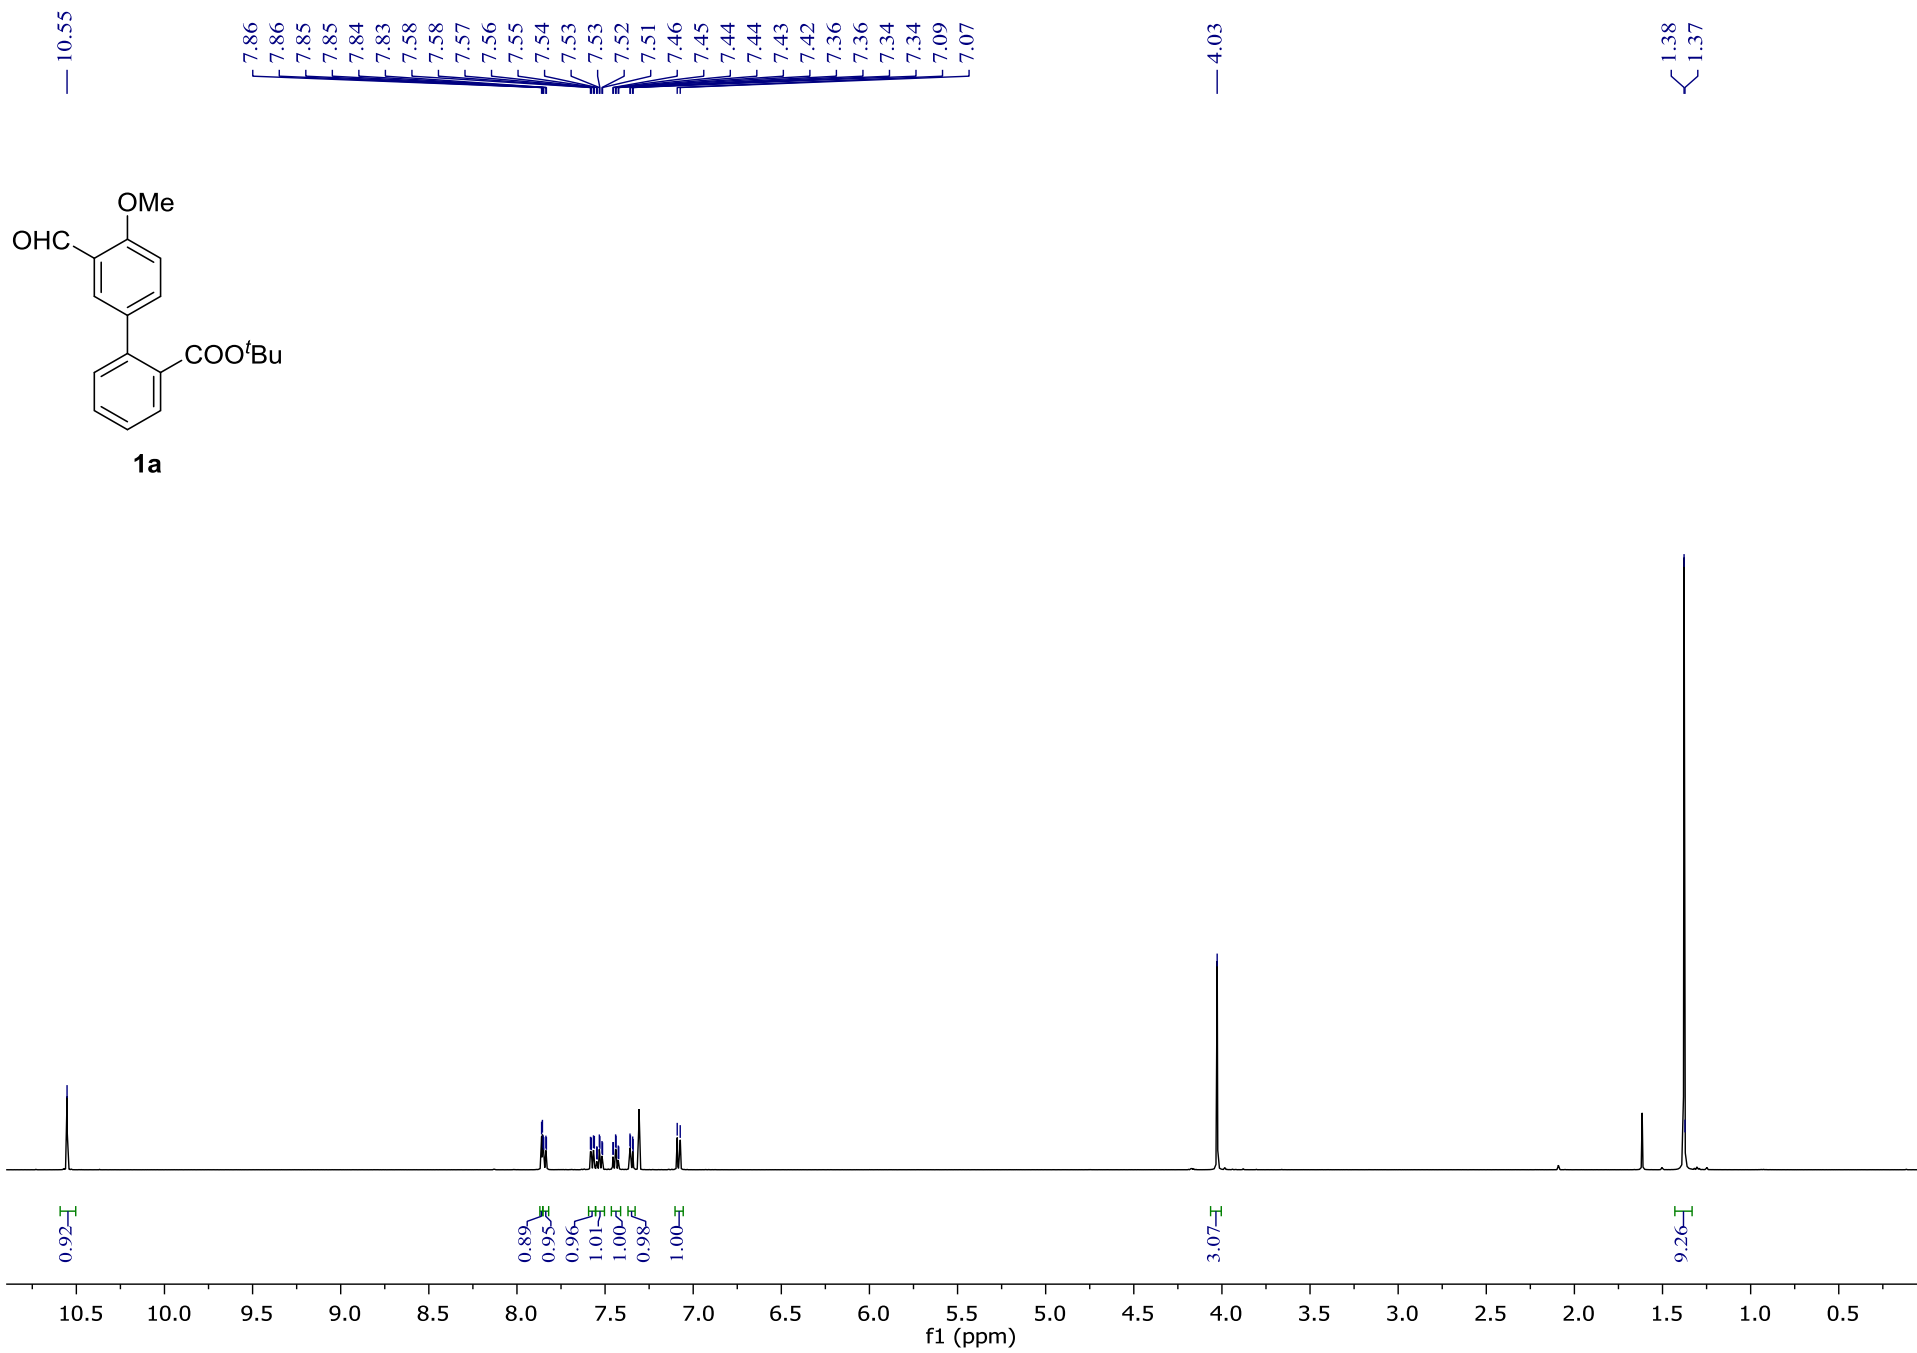

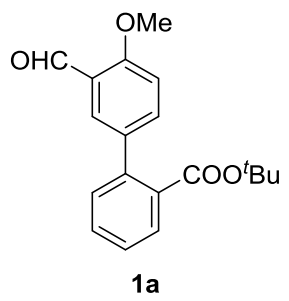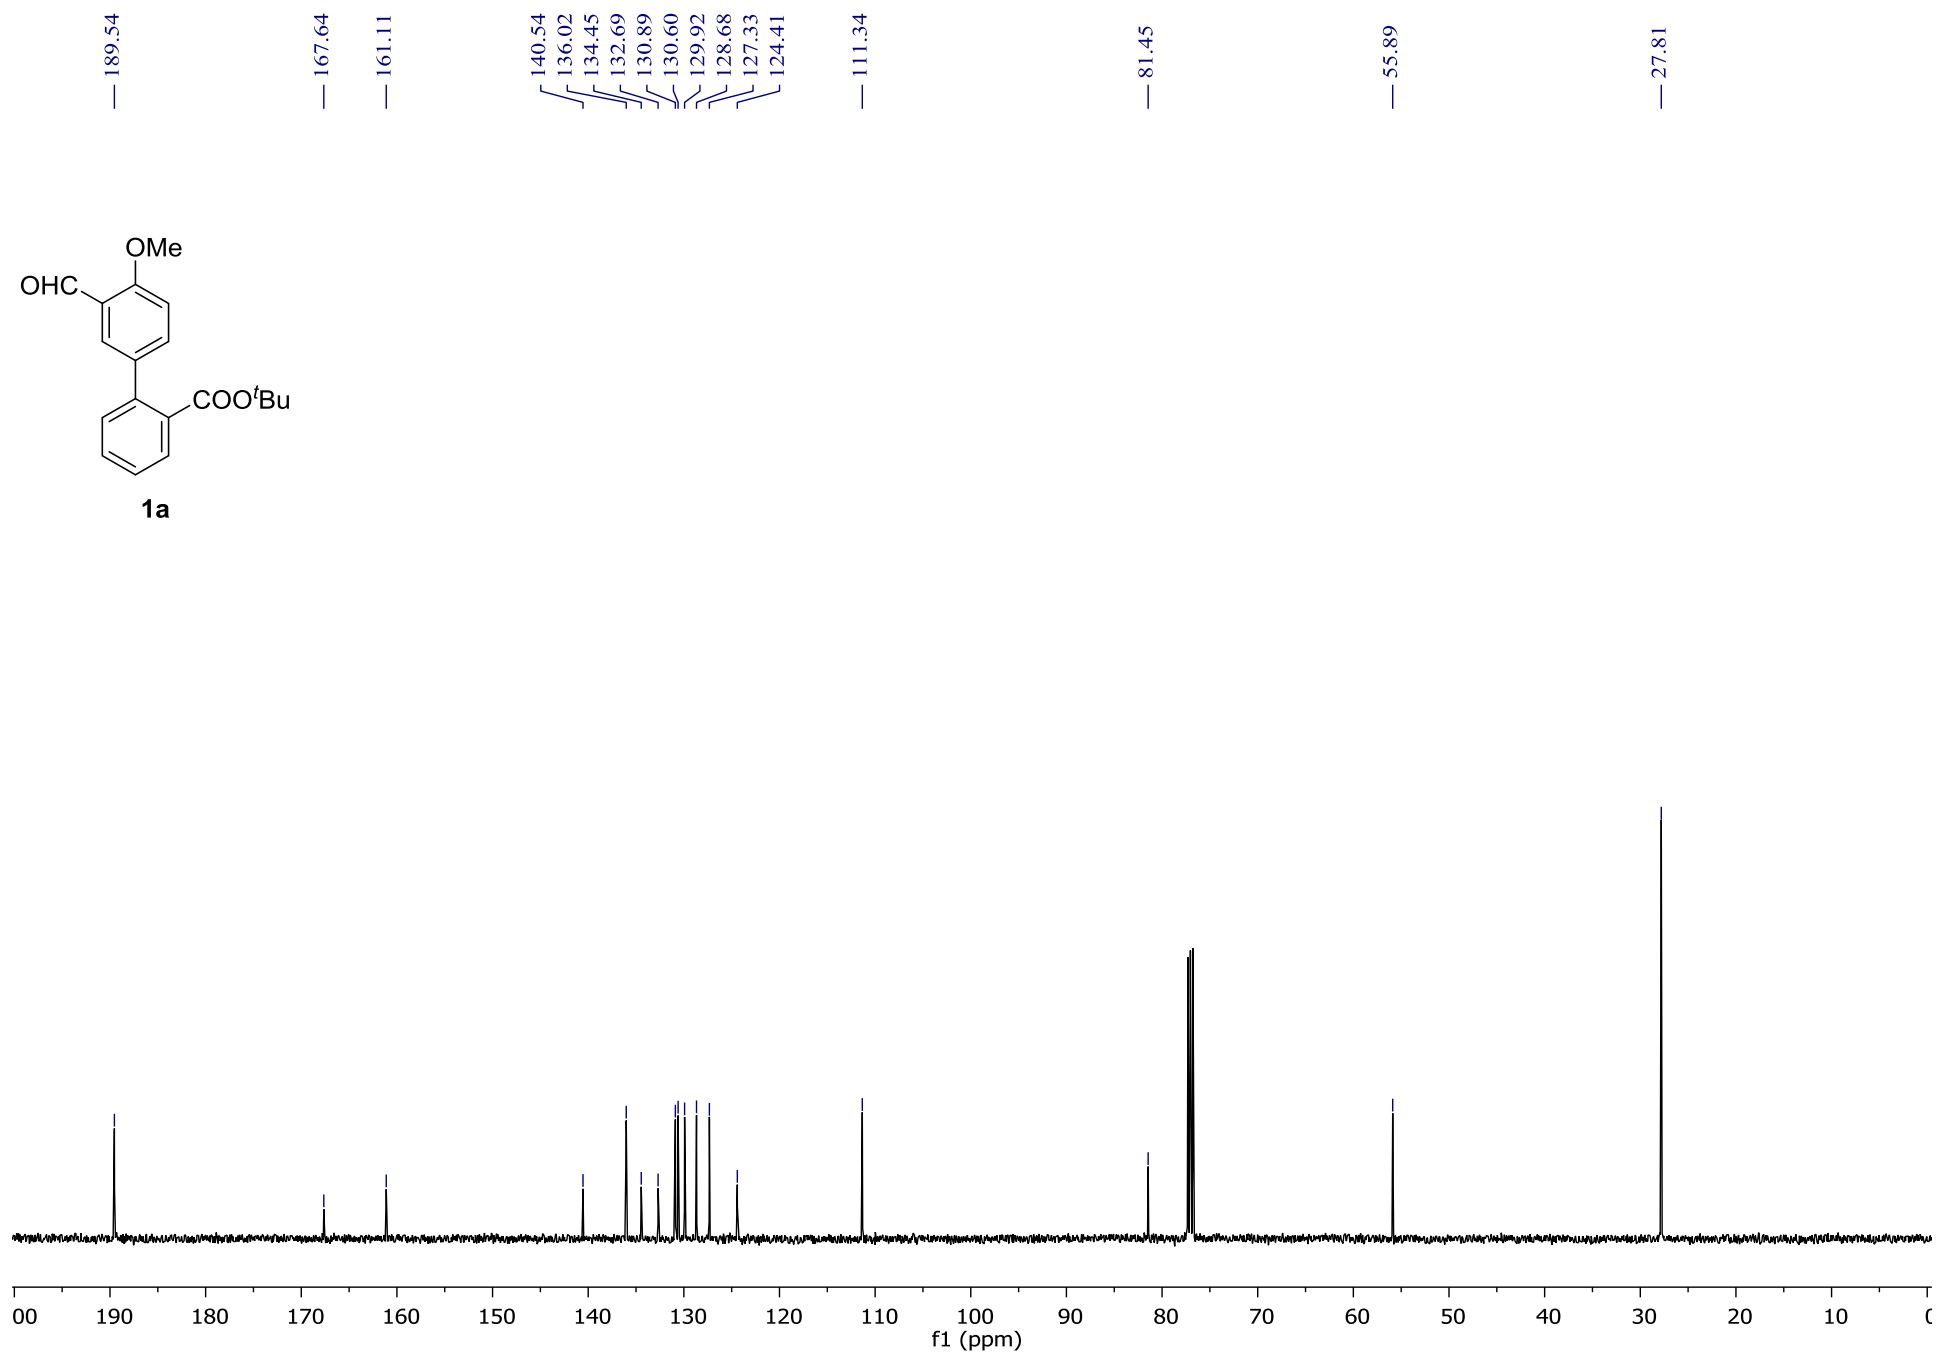

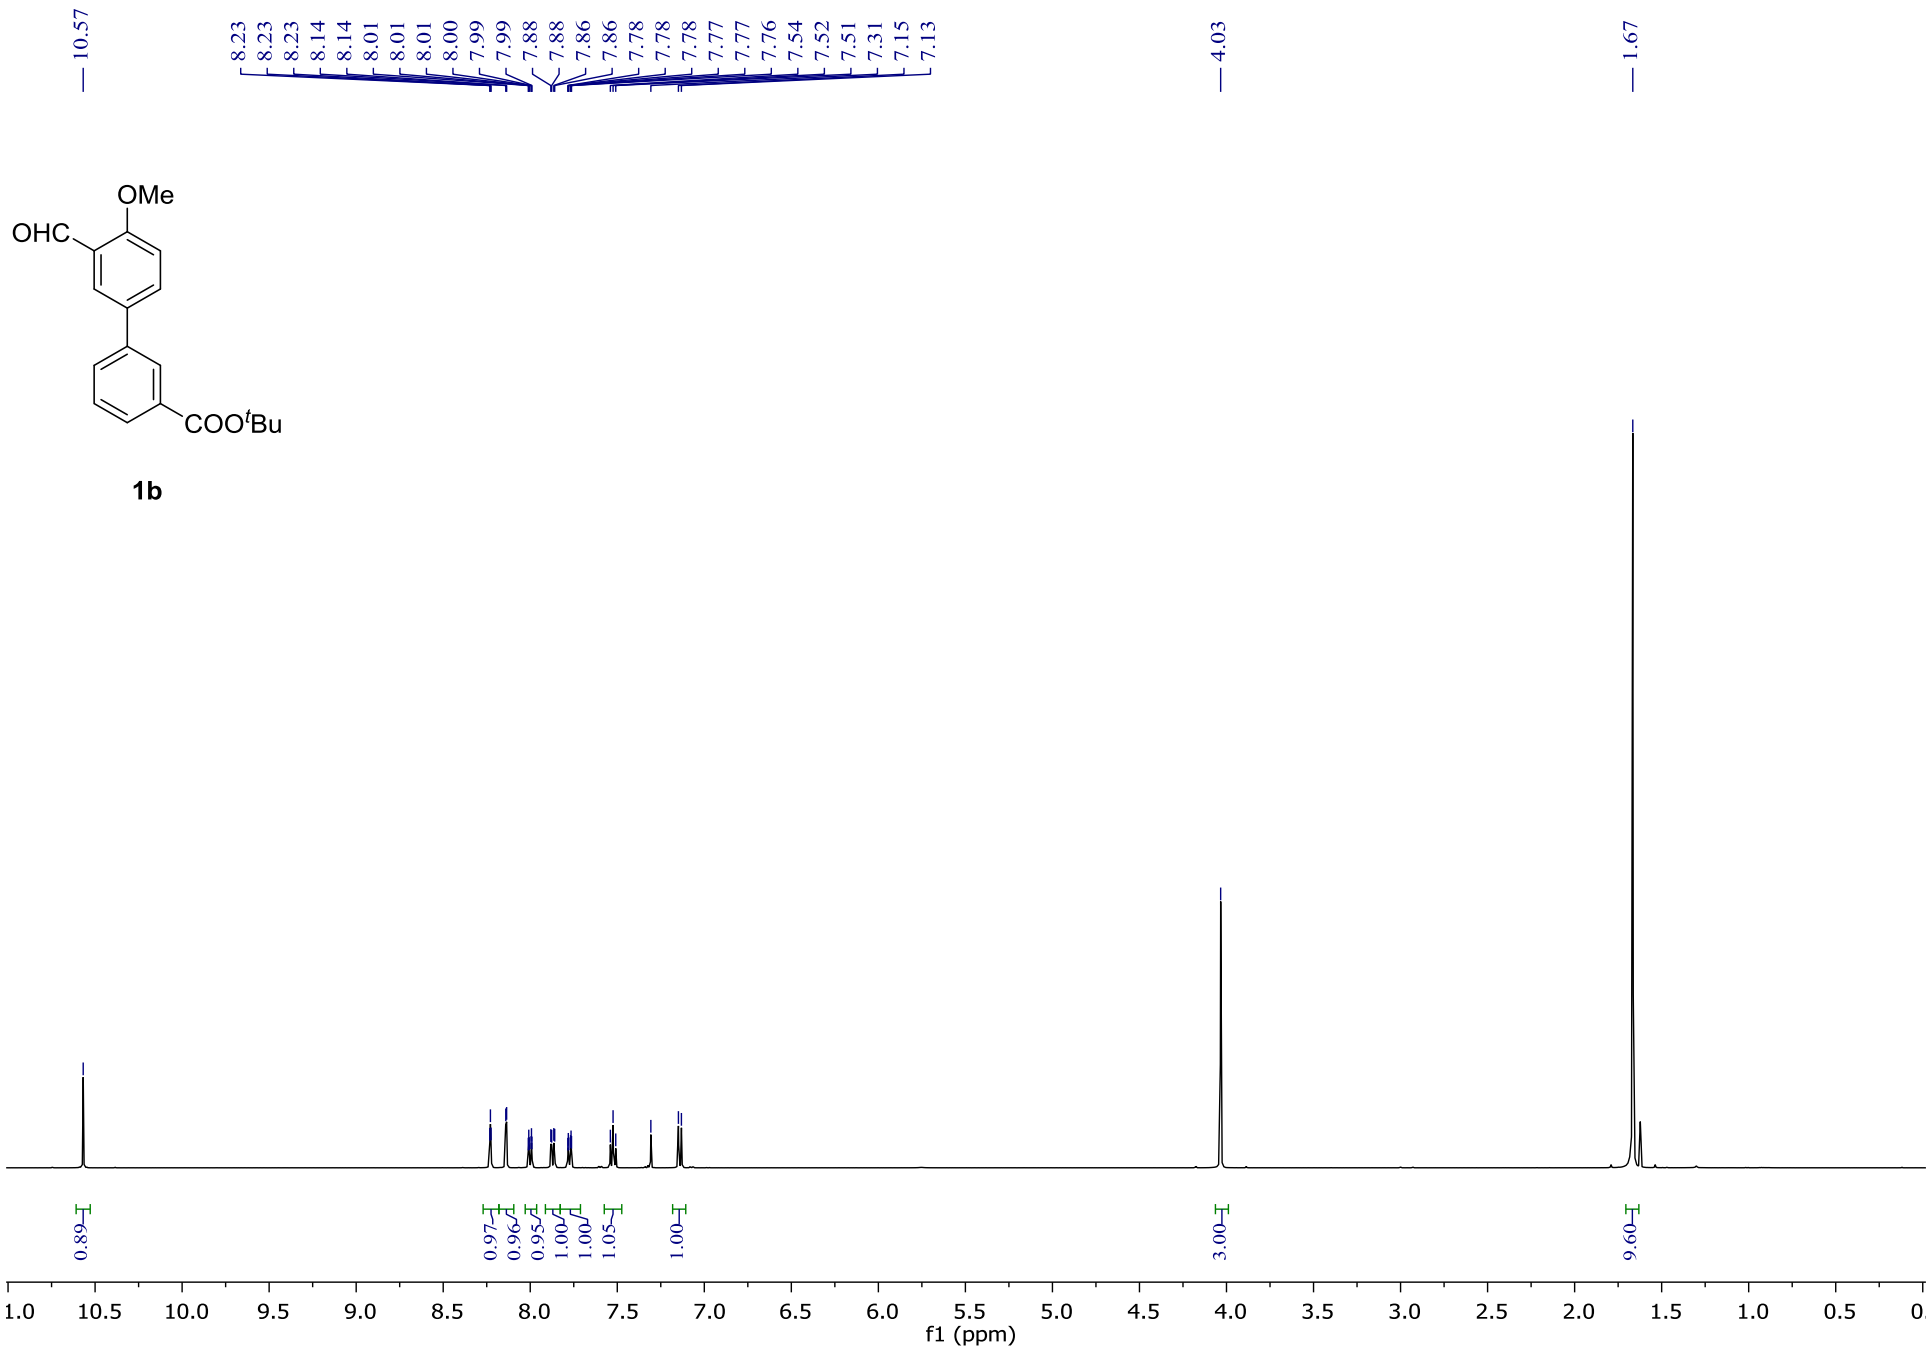



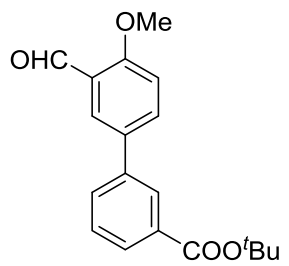

**1b**

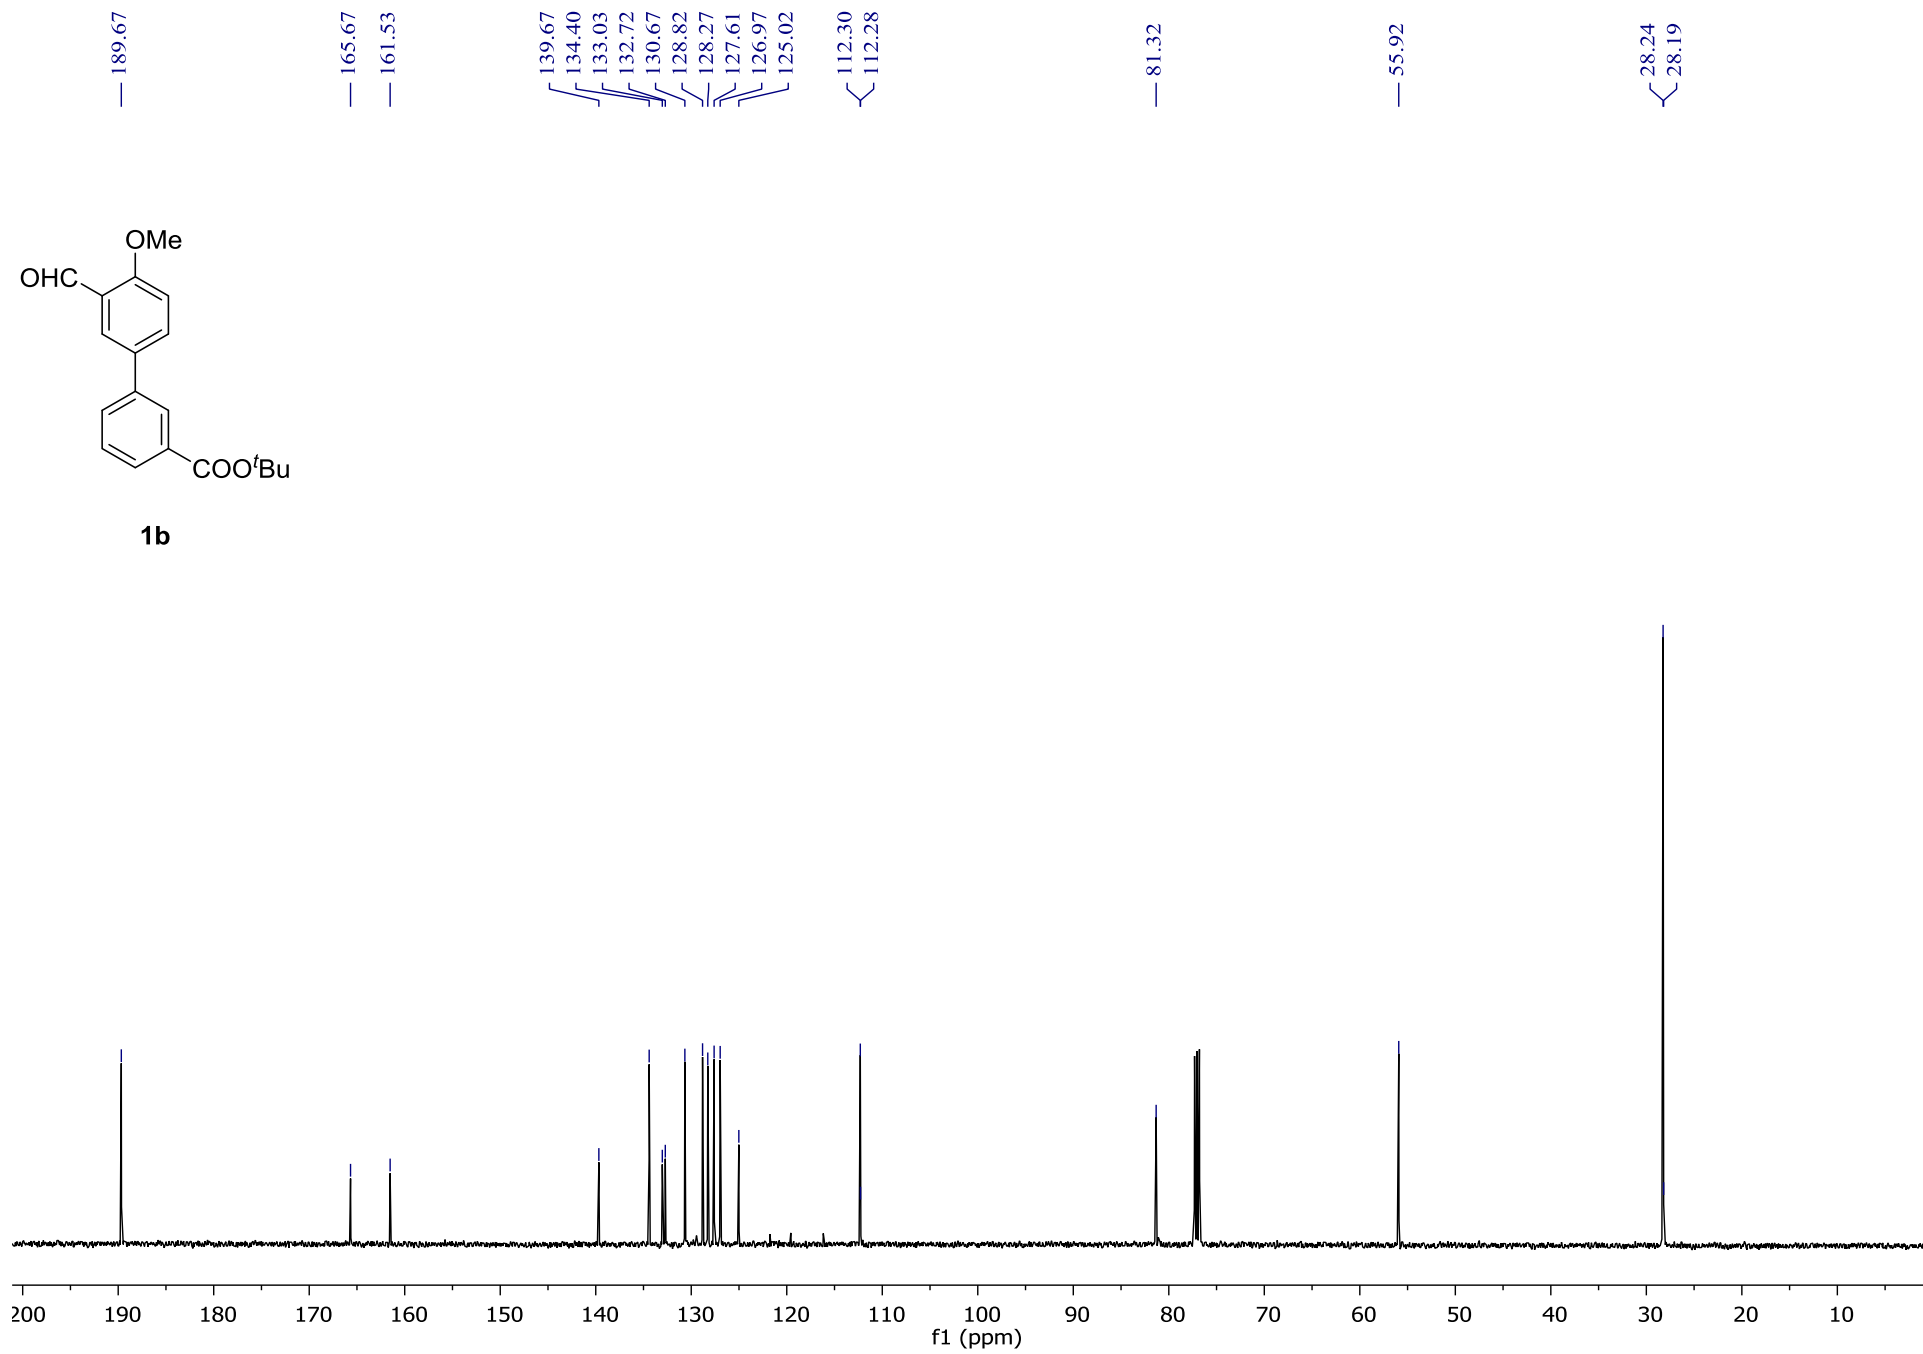

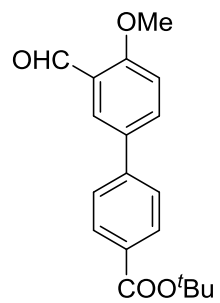

**1c**

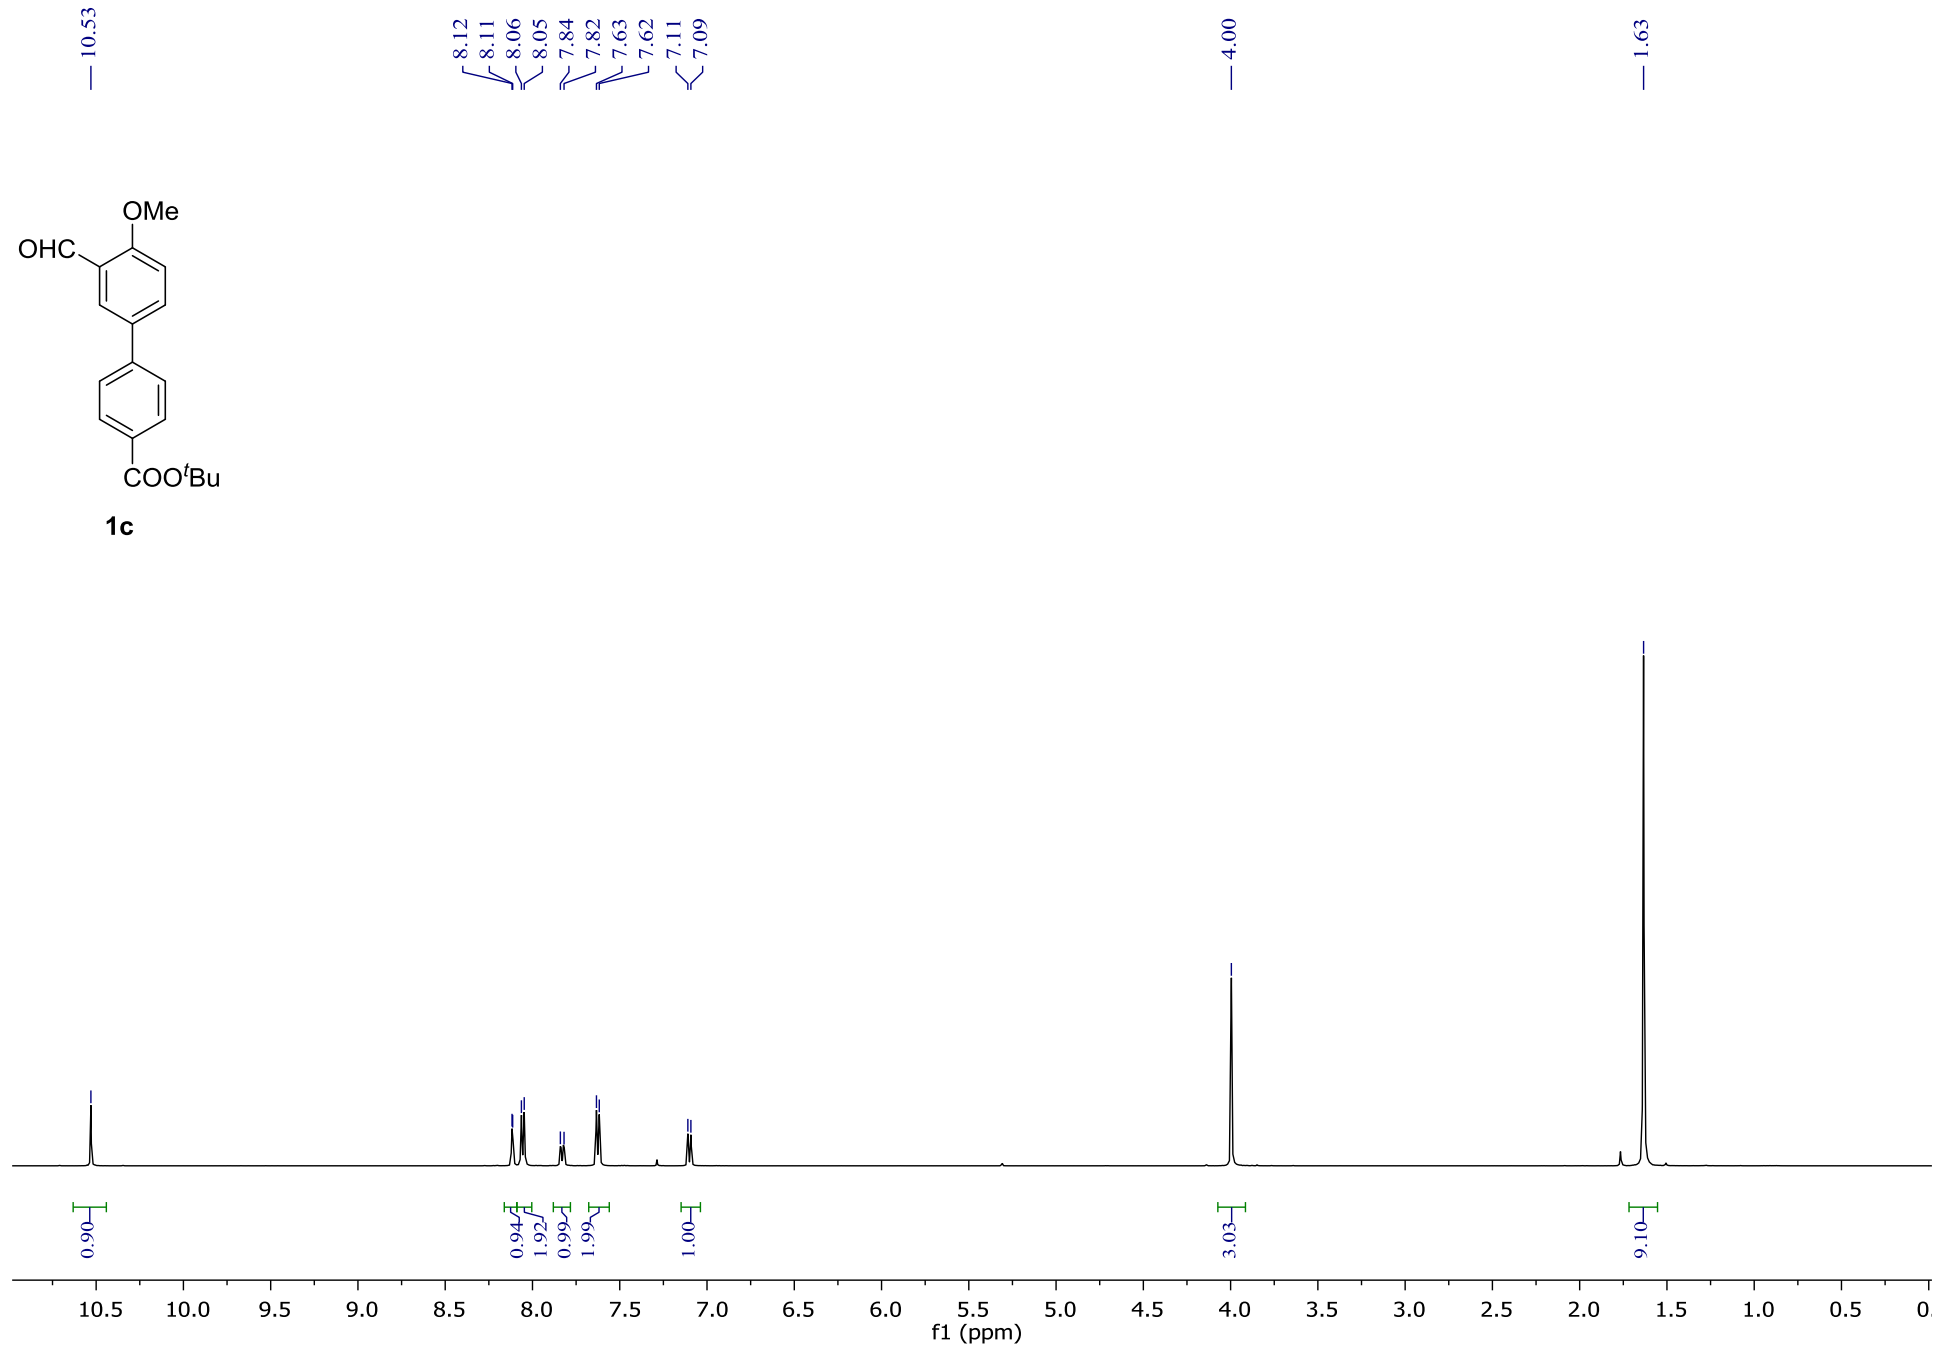

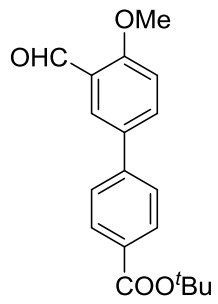

**1c**

— 189.52

— 165.54

— 161.73

— 143.32

134.38

132.65

130.80

130.03

126.94

126.32

124.98

— 112.30

— 81.07

— 55.91

— 28.23

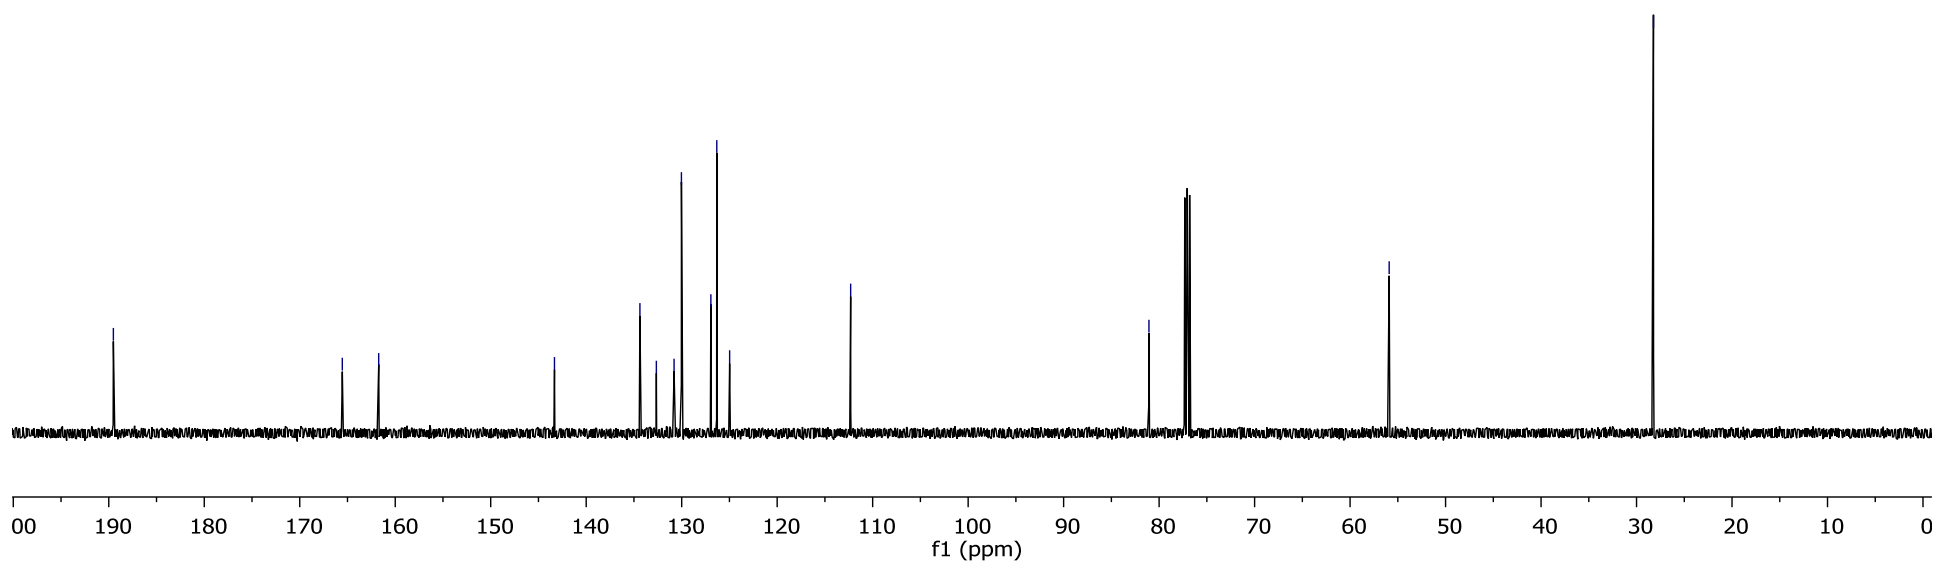

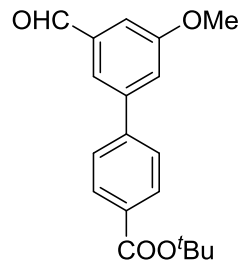

**1d**

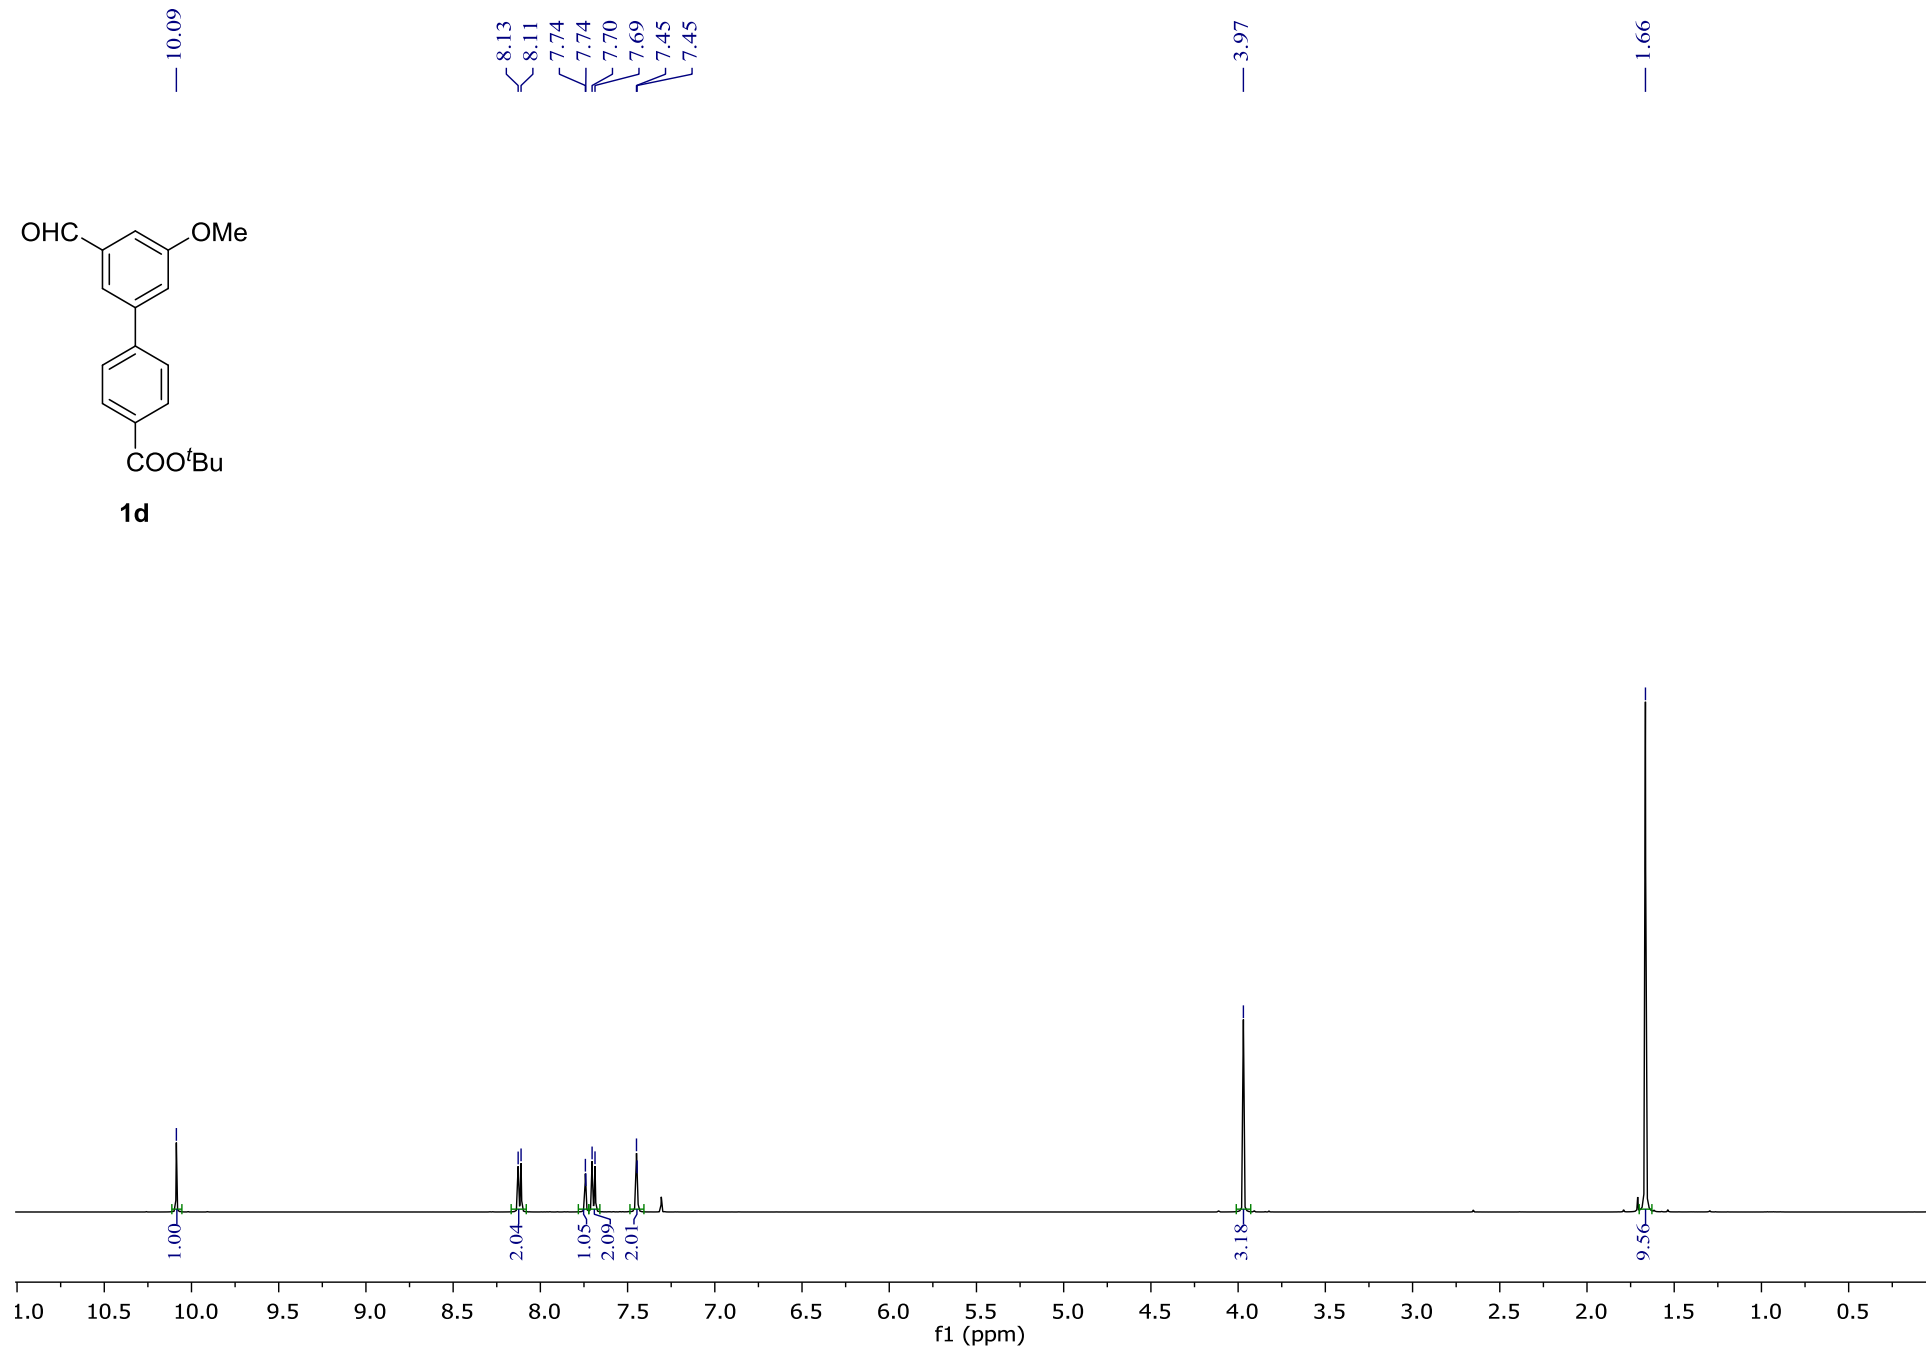

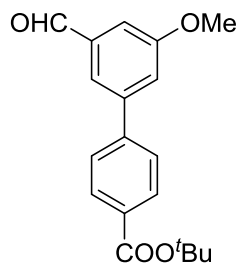

**1d**

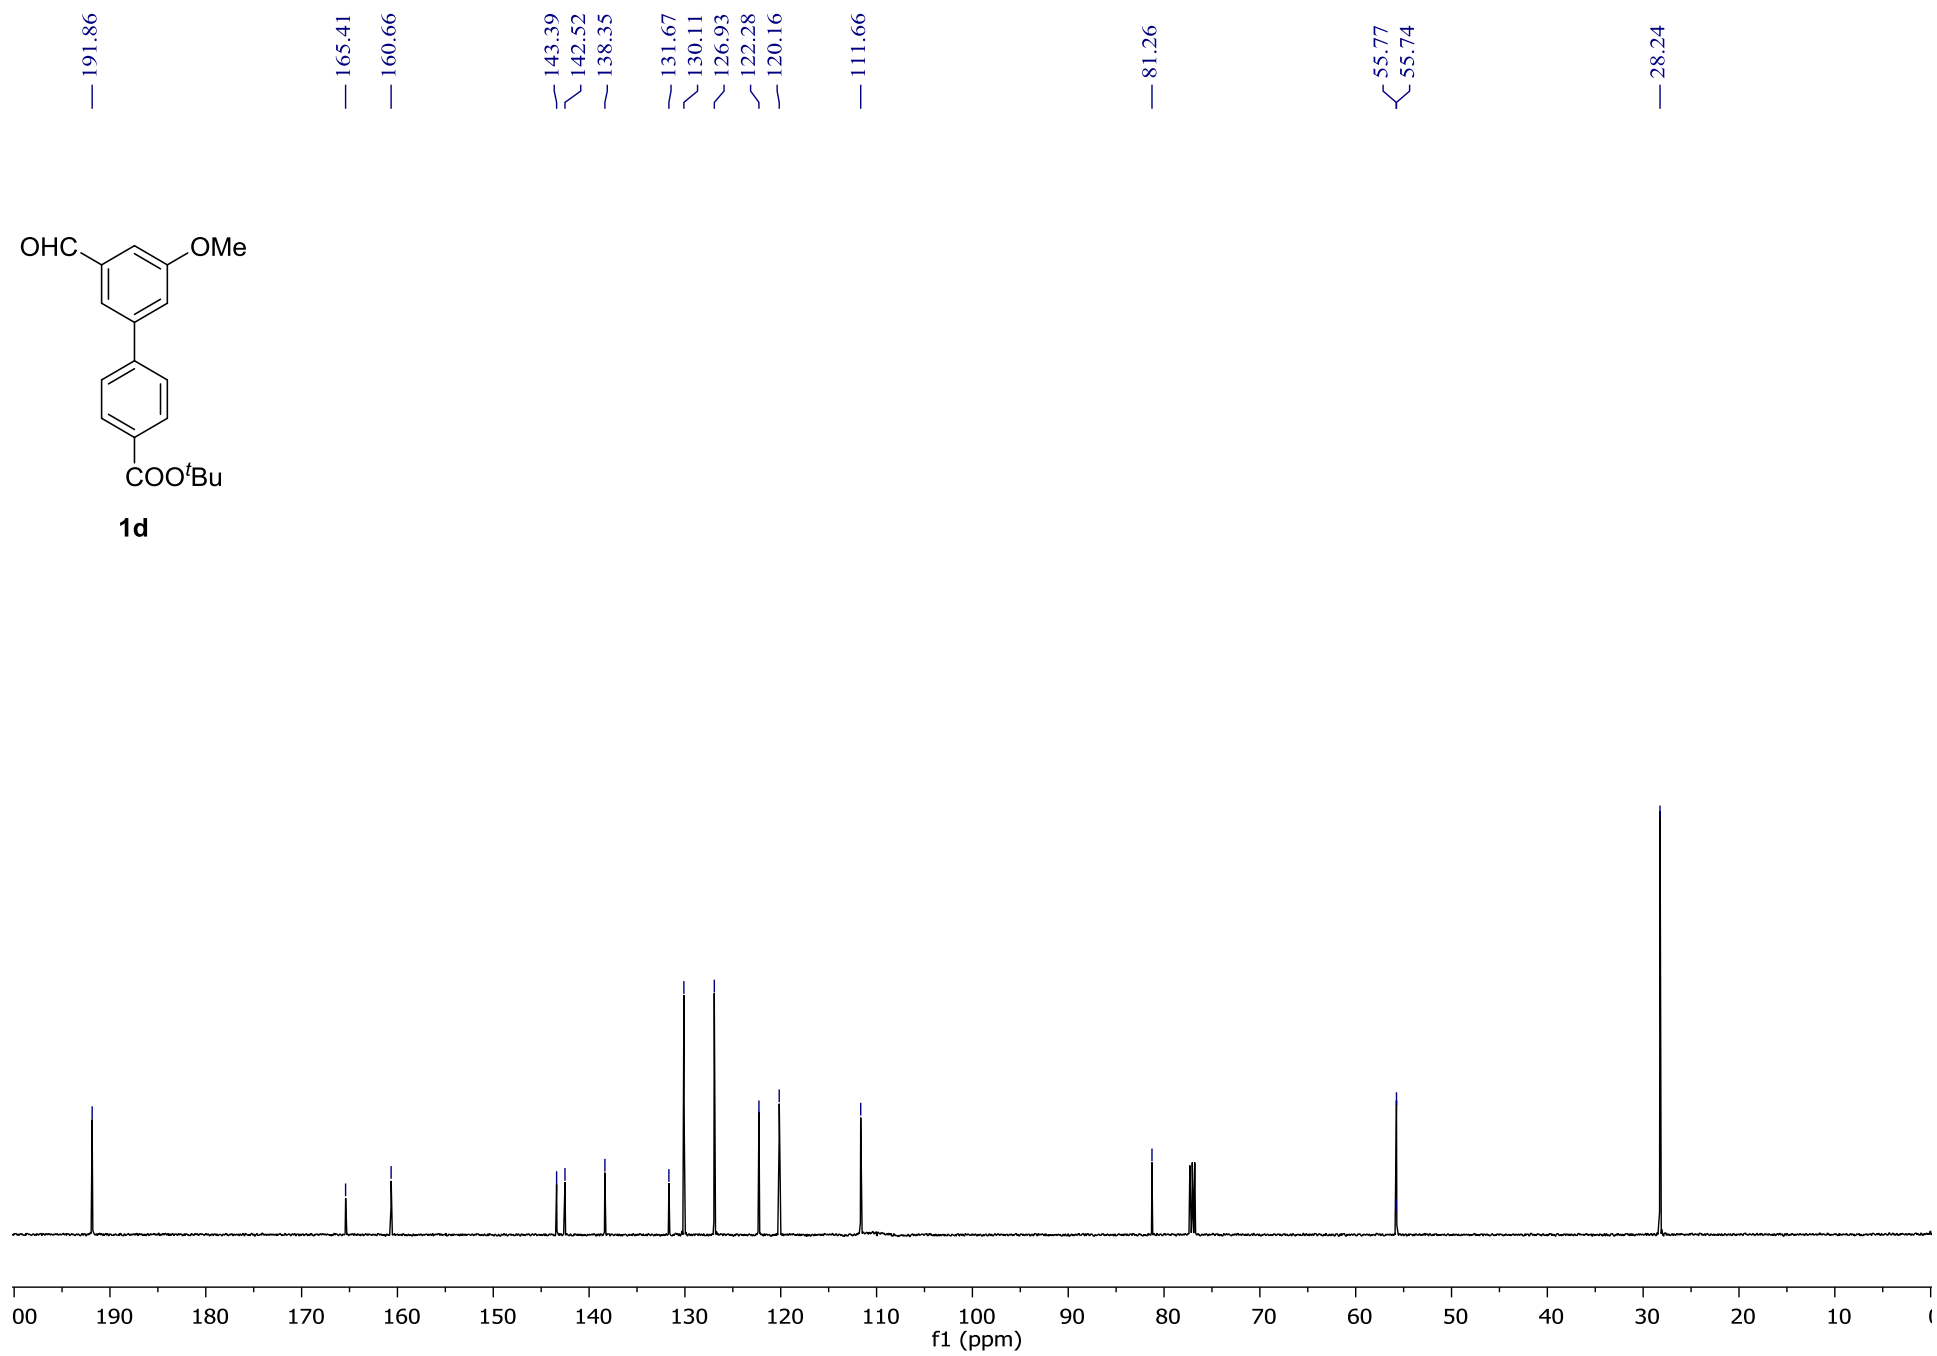

7.82  
7.82  
7.81  
7.80  
7.54  
7.54  
7.54  
7.52  
7.52  
7.50  
7.43  
7.41  
7.41  
7.40  
7.39  
7.39  
7.38  
7.38  
7.25  
6.94  
6.93

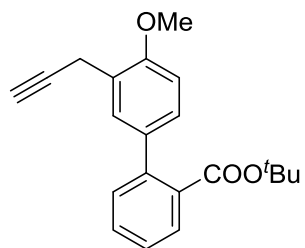

2a

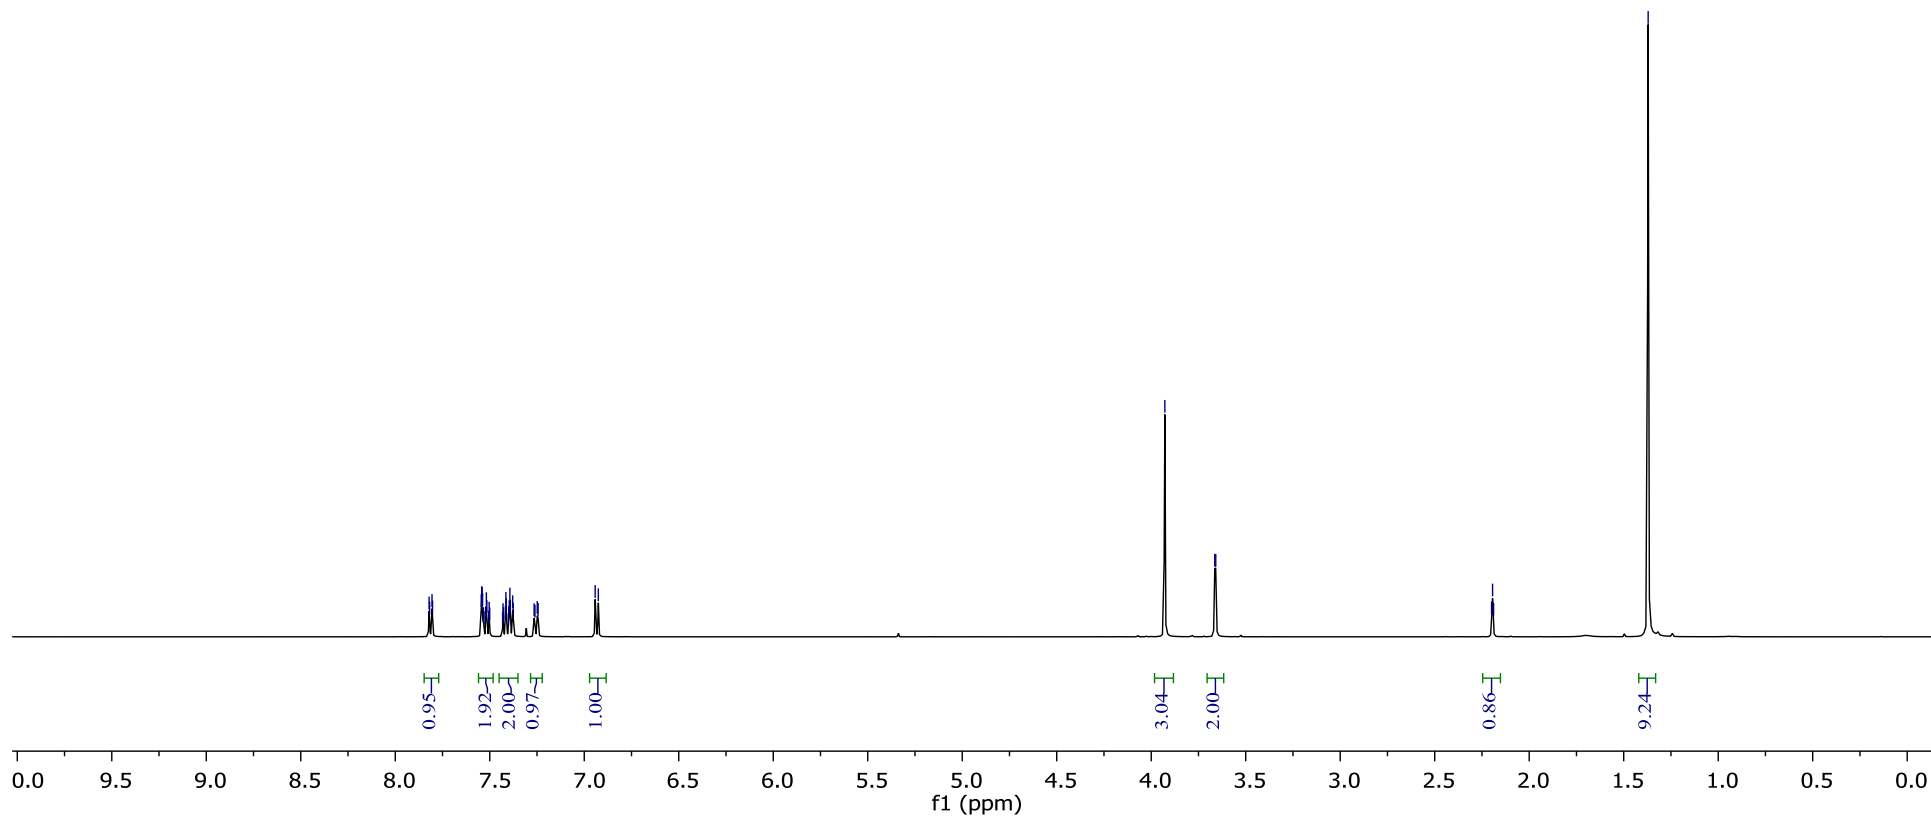

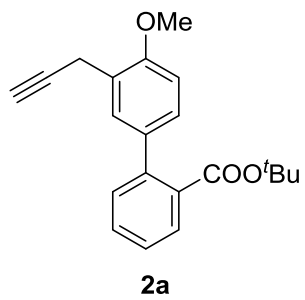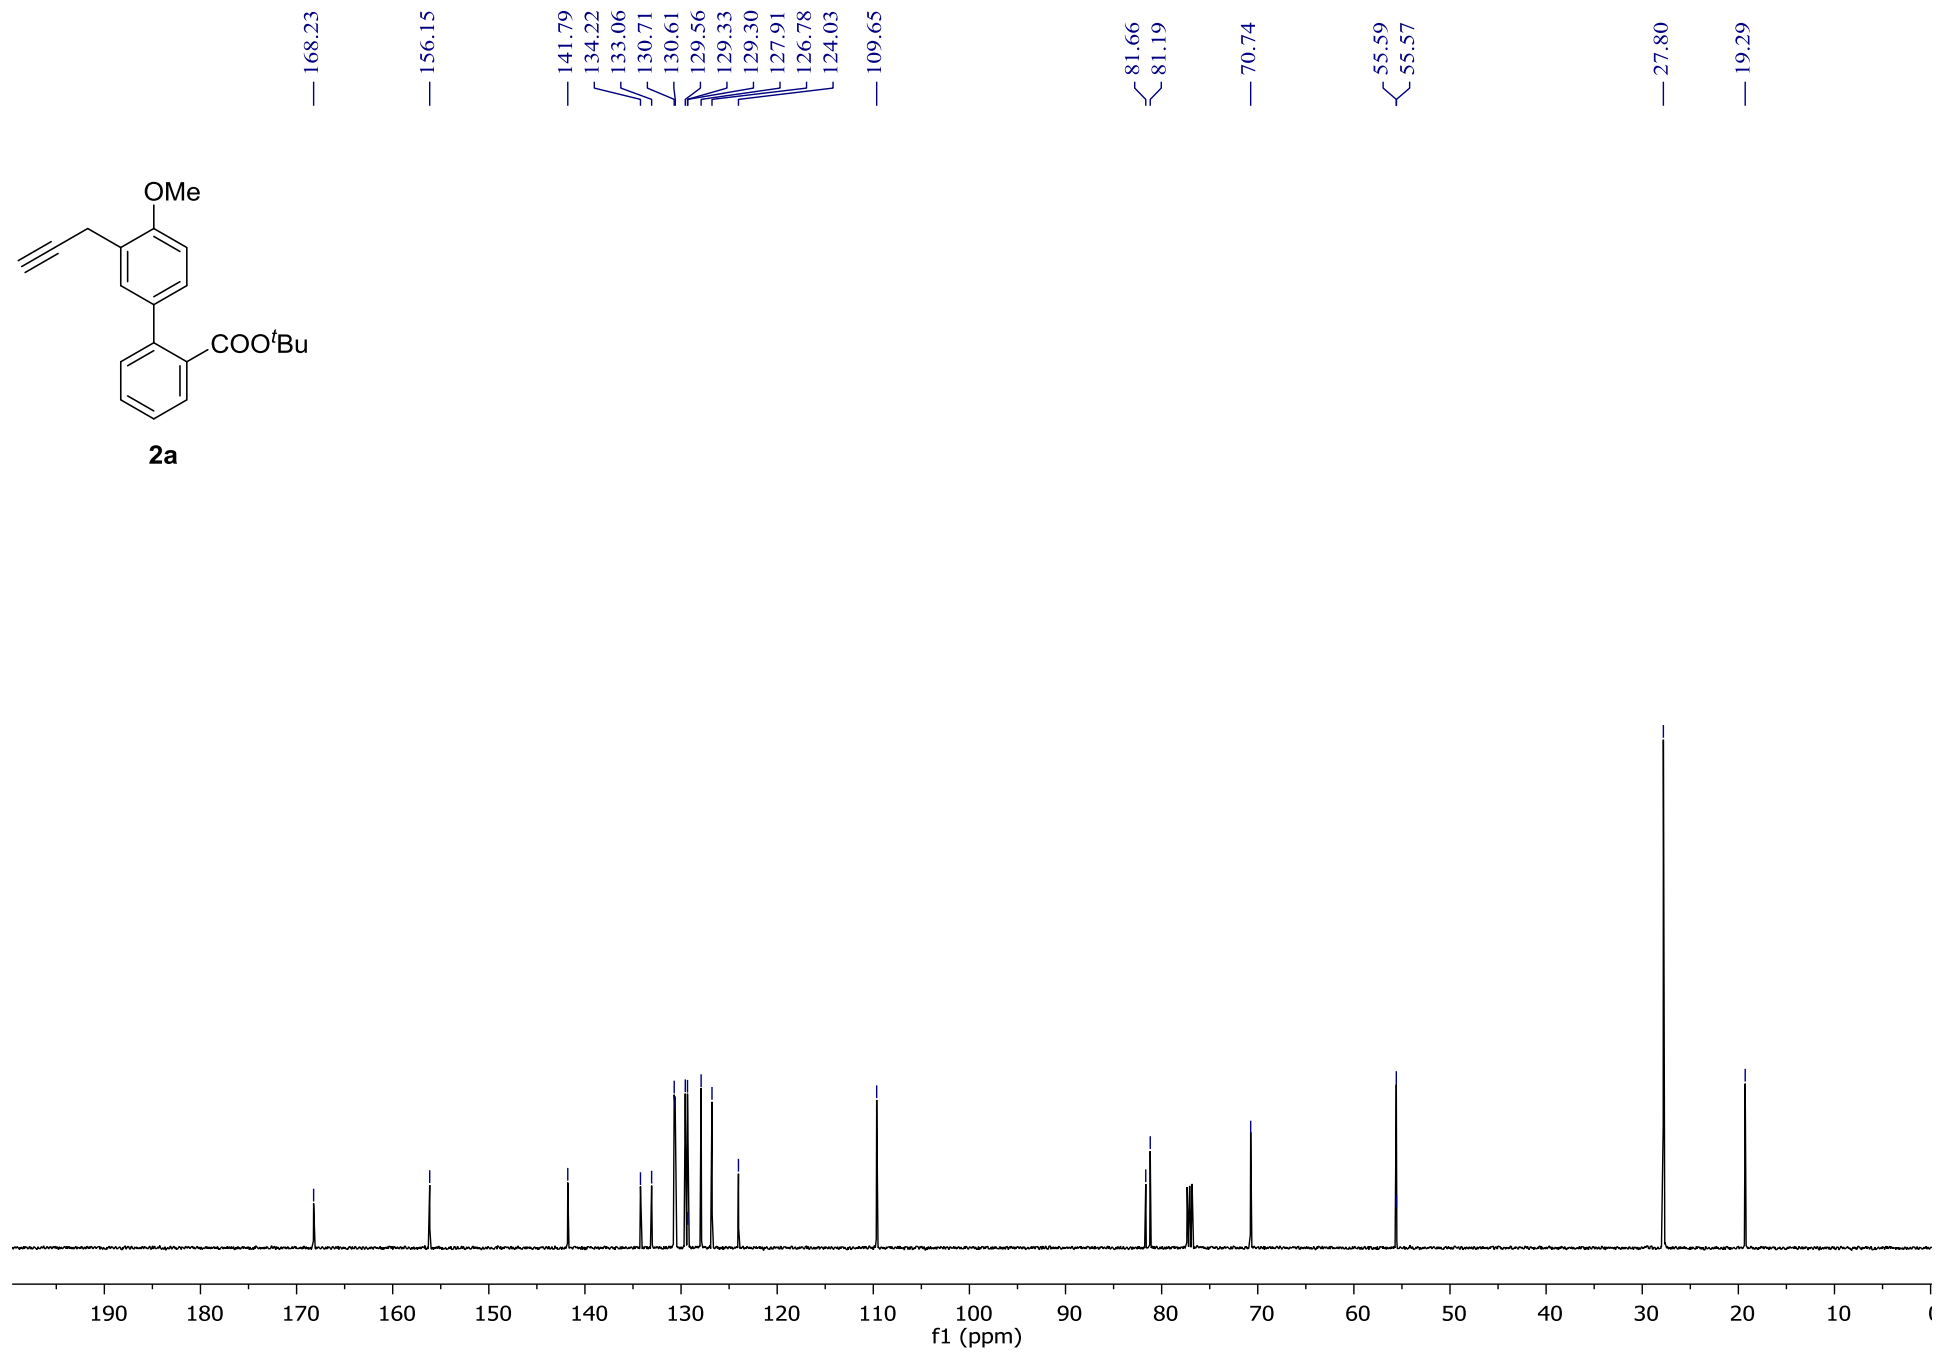

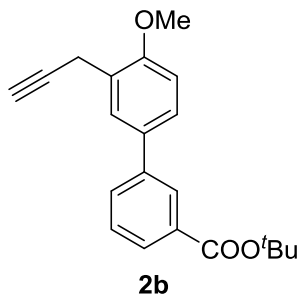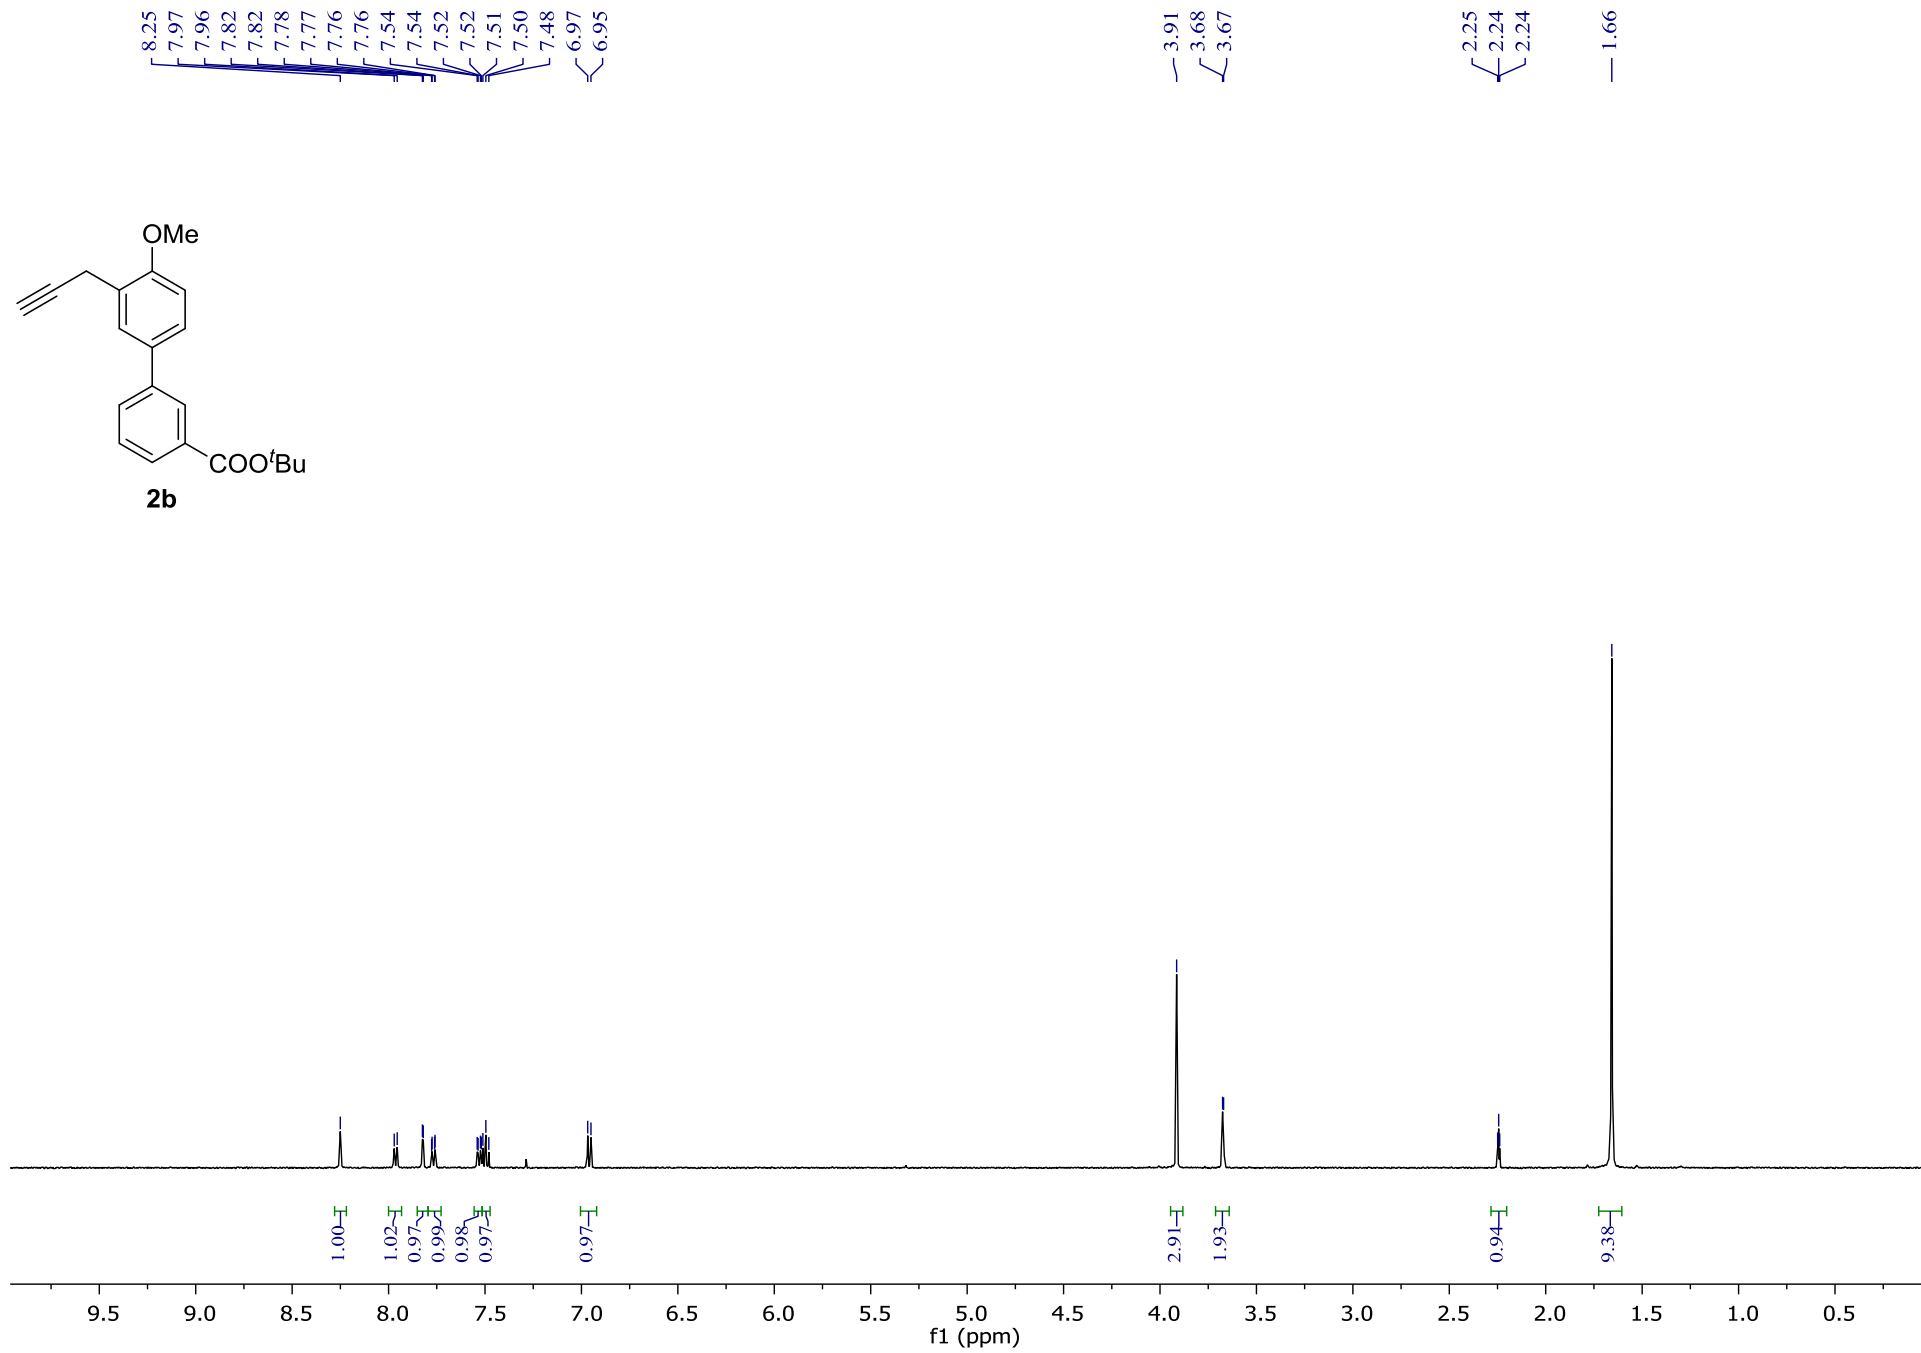



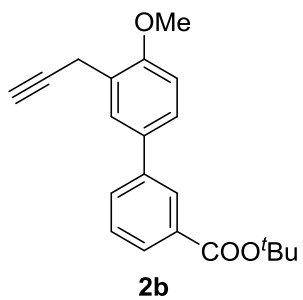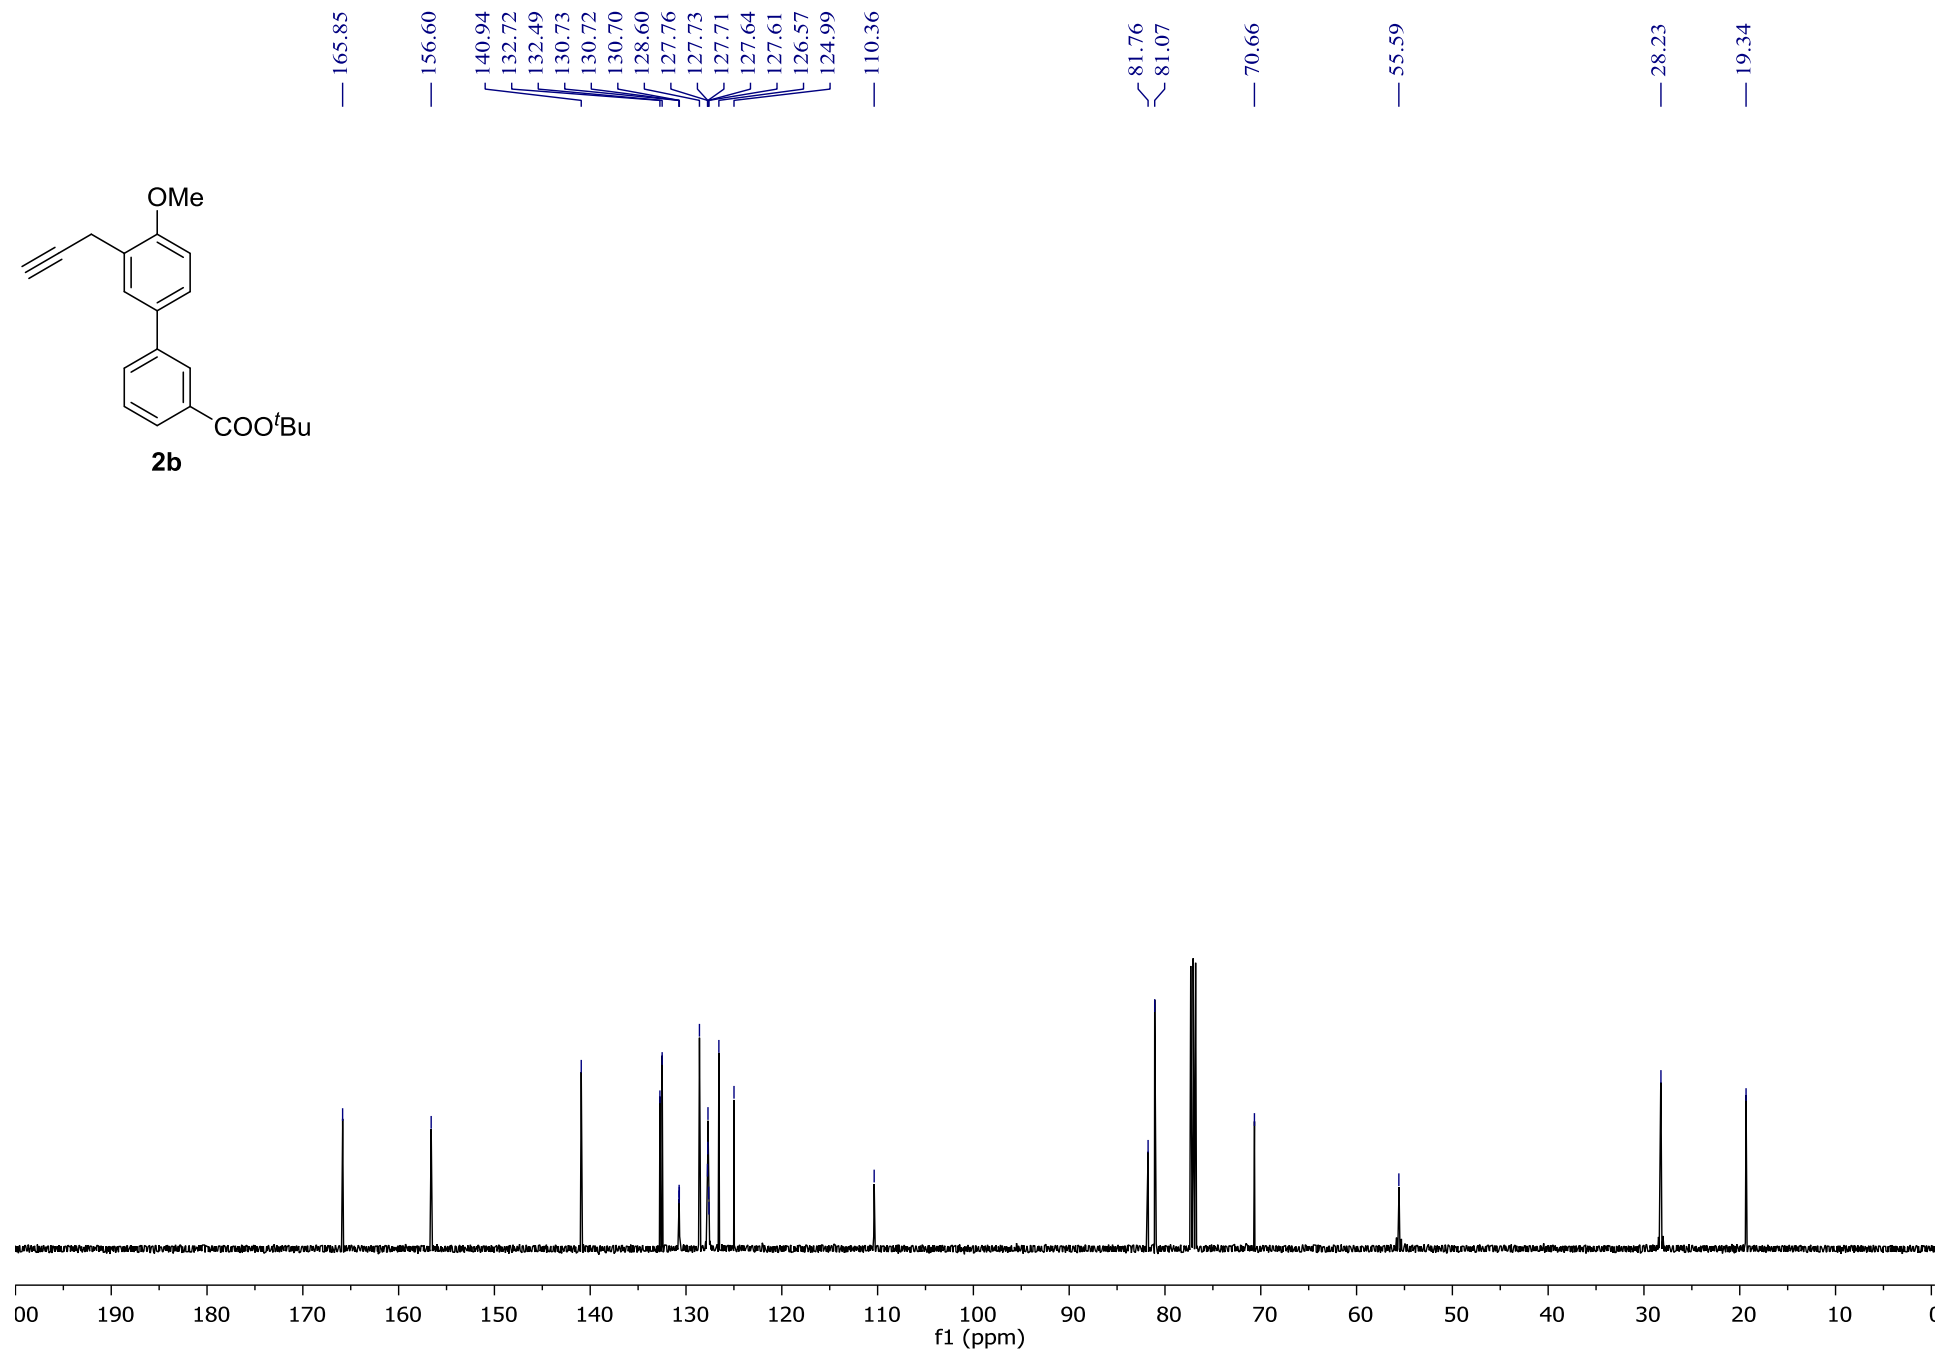

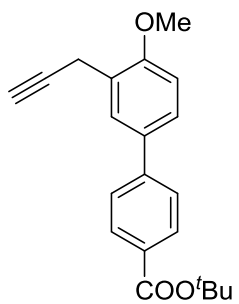

2c

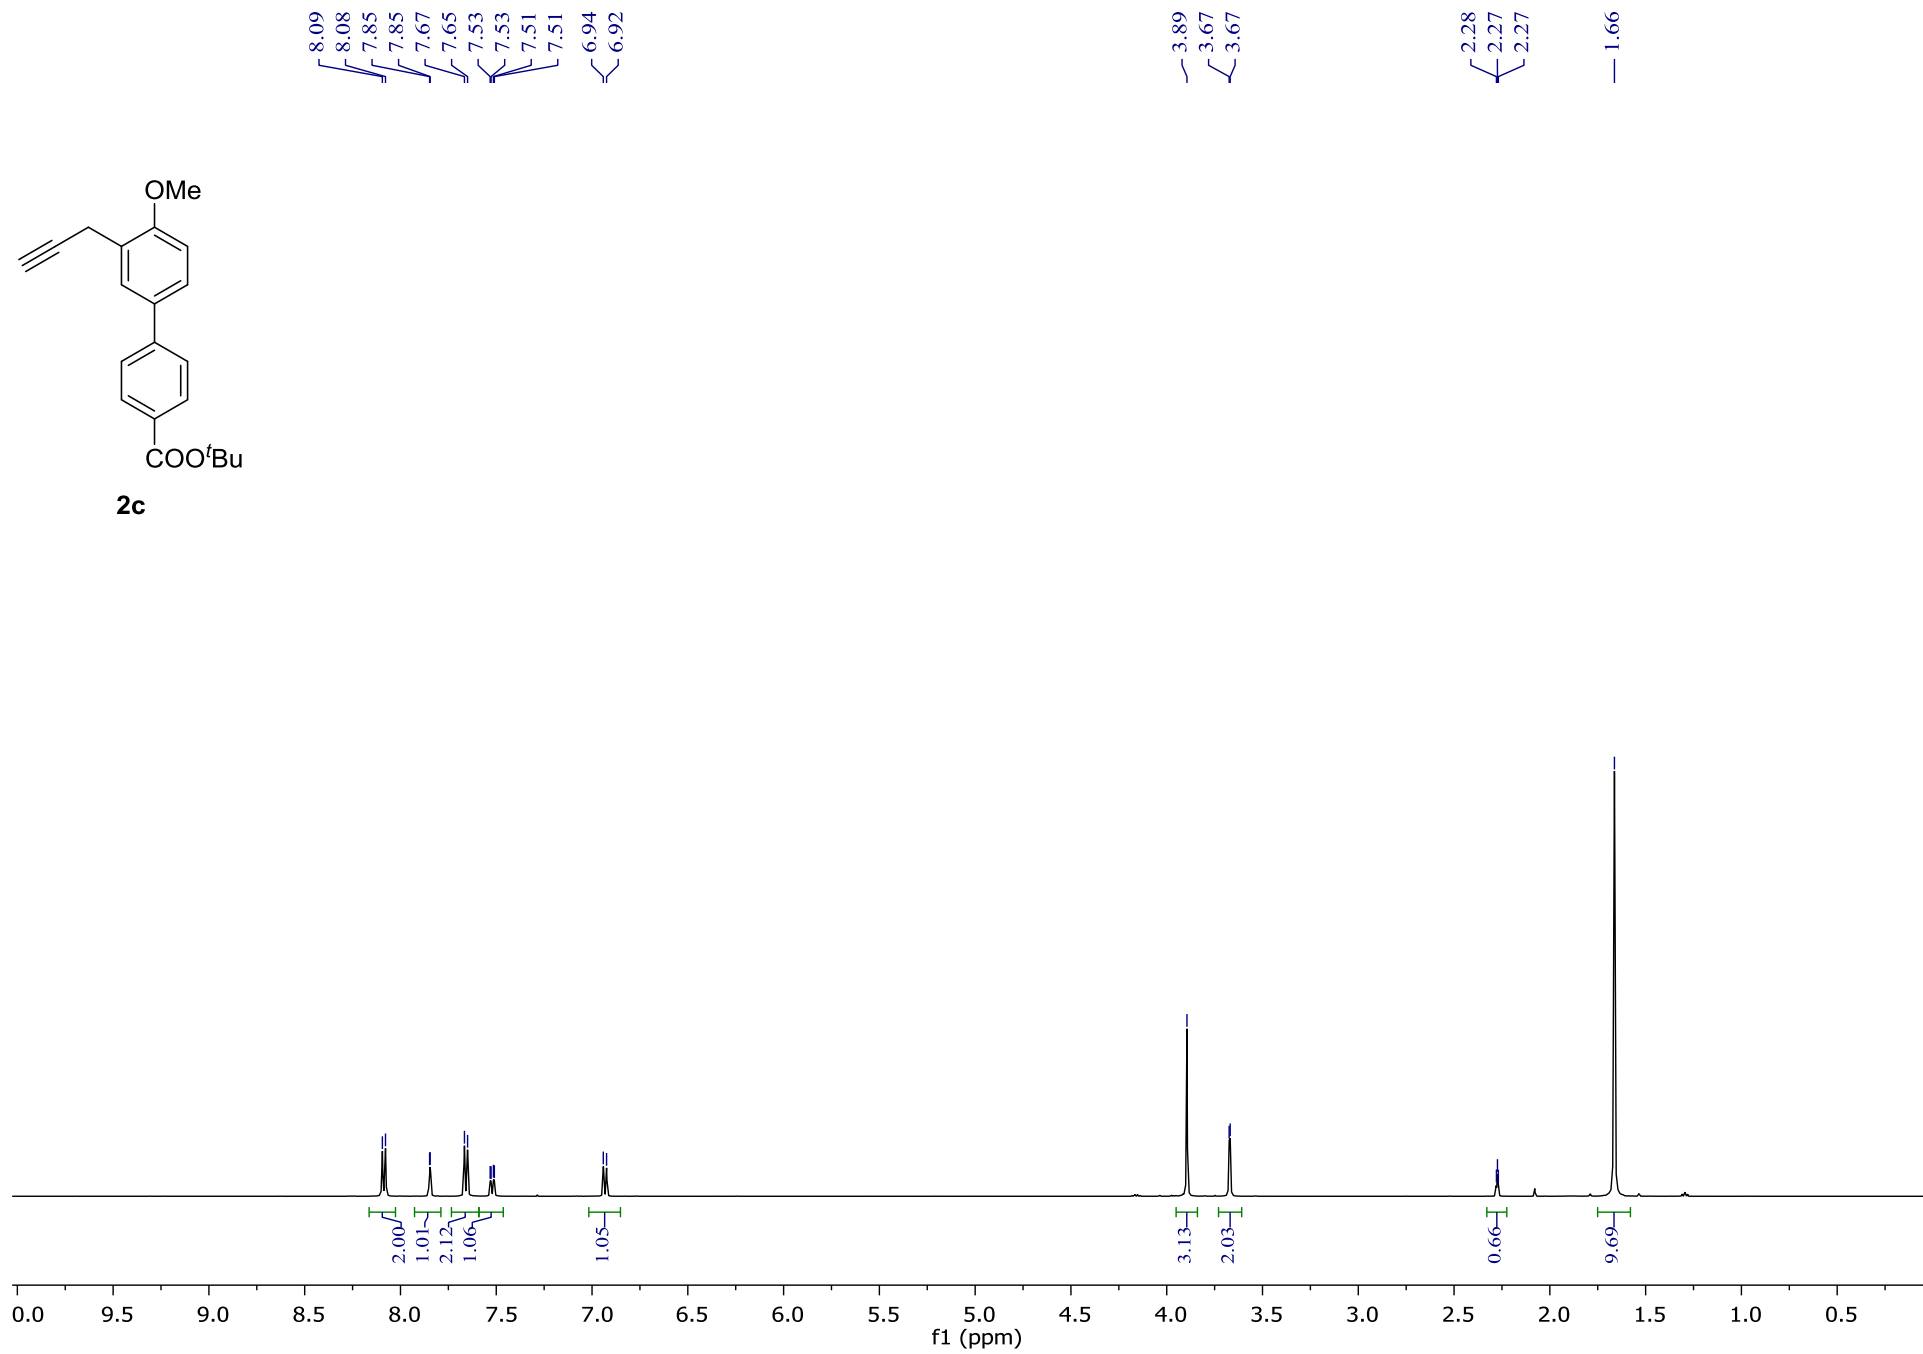

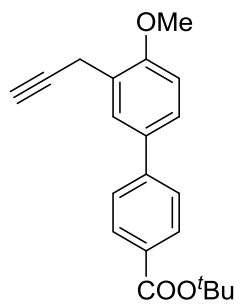

2c

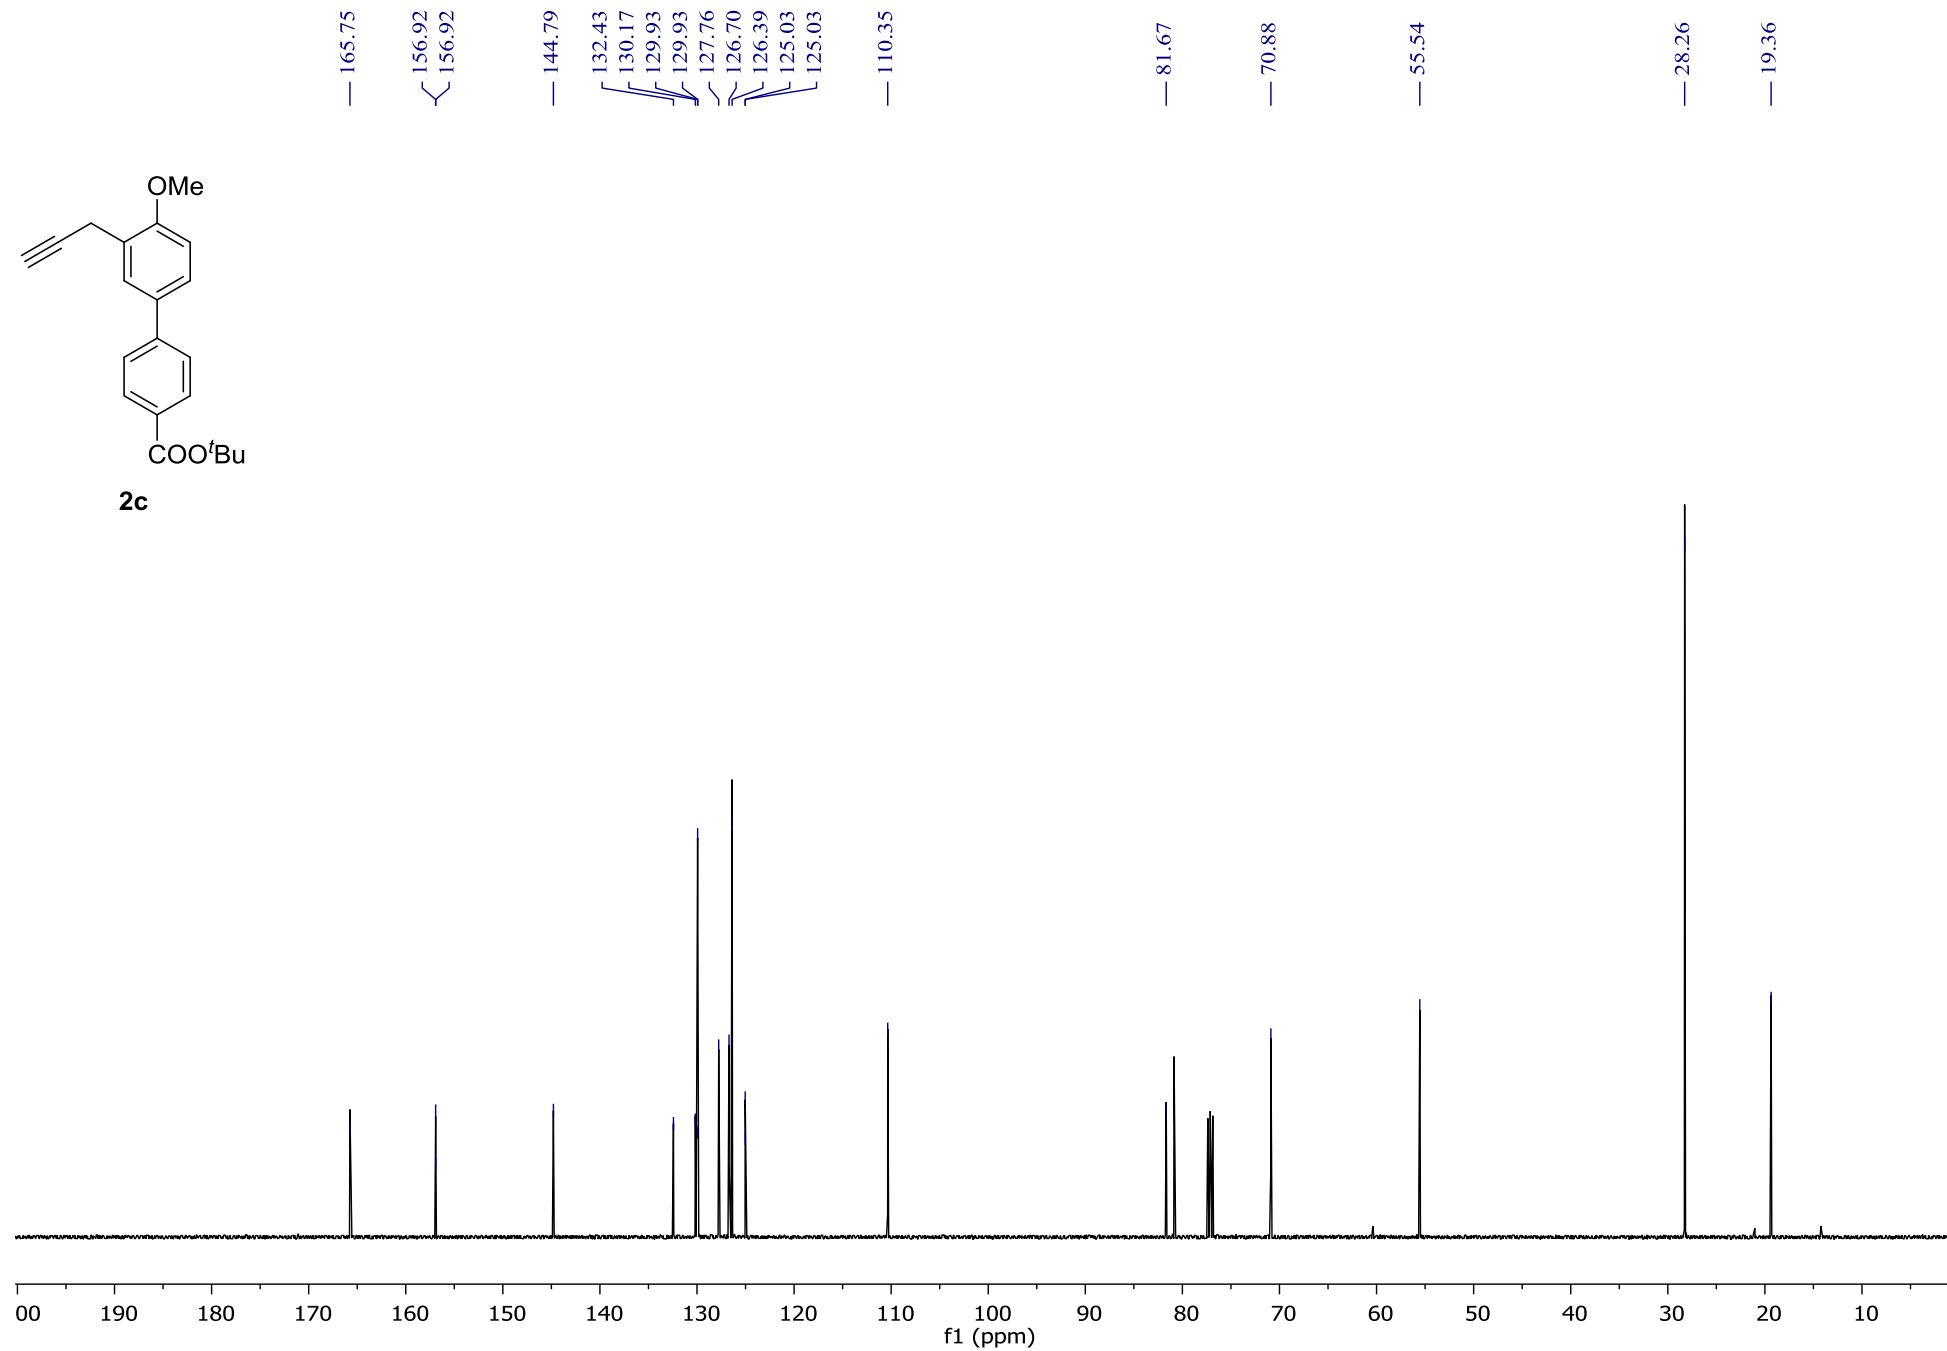

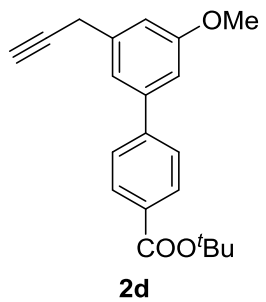

8.10  
8.08

7.68  
7.66

7.23  
7.07  
7.00

3.92  
3.71  
3.70

2.28  
2.27  
2.27

1.66

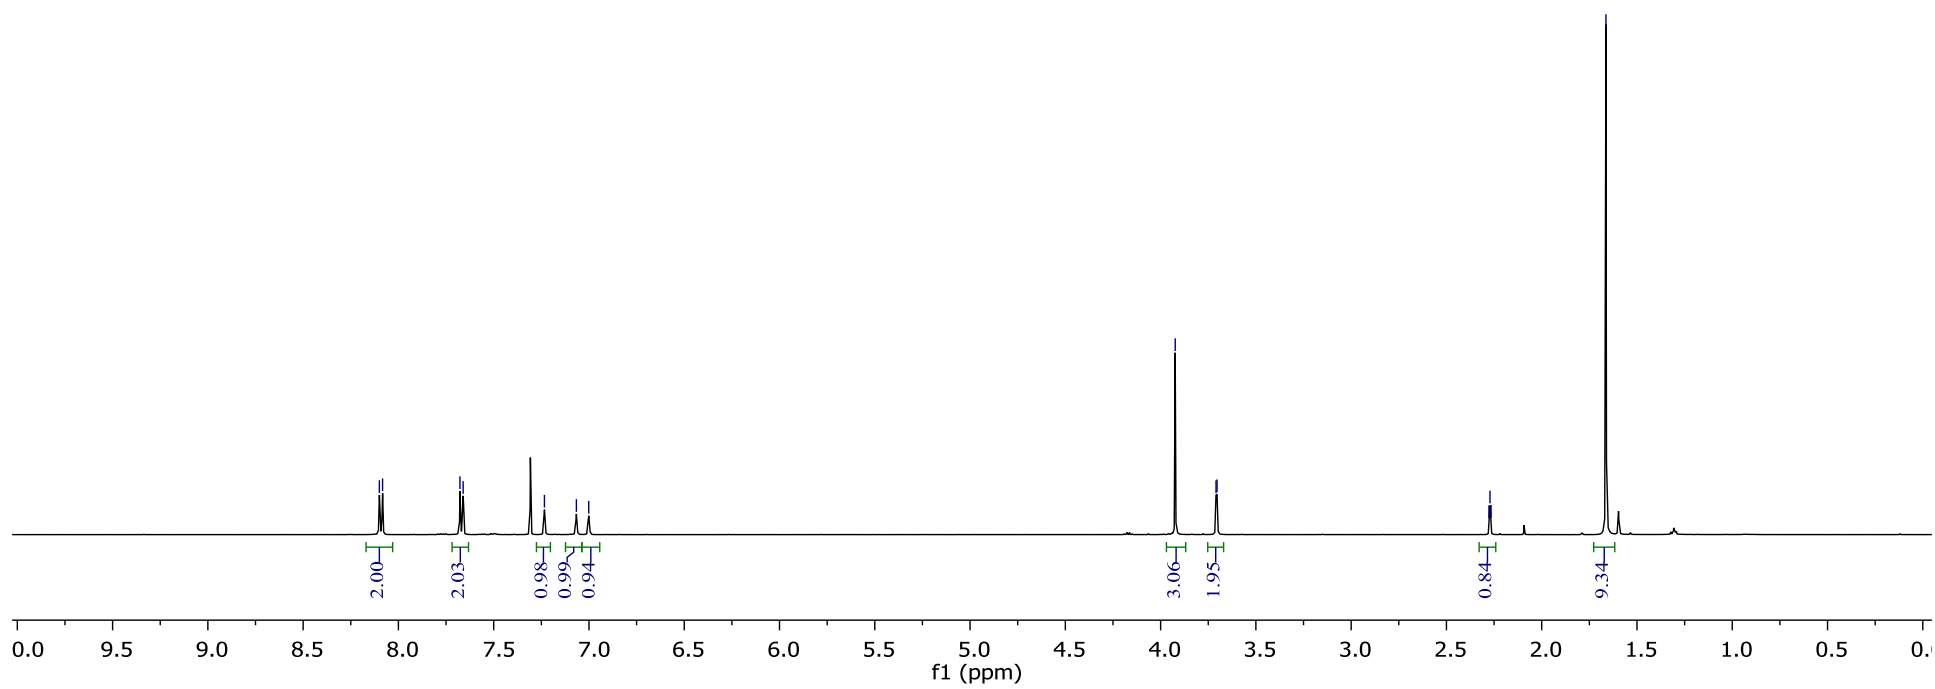

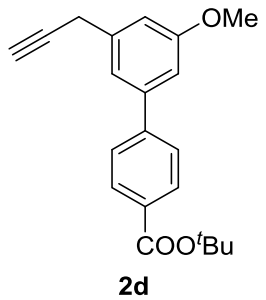

— 165.65

— 160.30

~ 144.87

~ 141.93

~ 138.23

~ 131.07

~ 129.91

~ 126.99

— 119.44

~ 113.09

~ 111.55

~ 81.59

~ 81.06

— 70.85

— 55.45

— 28.26

— 24.97

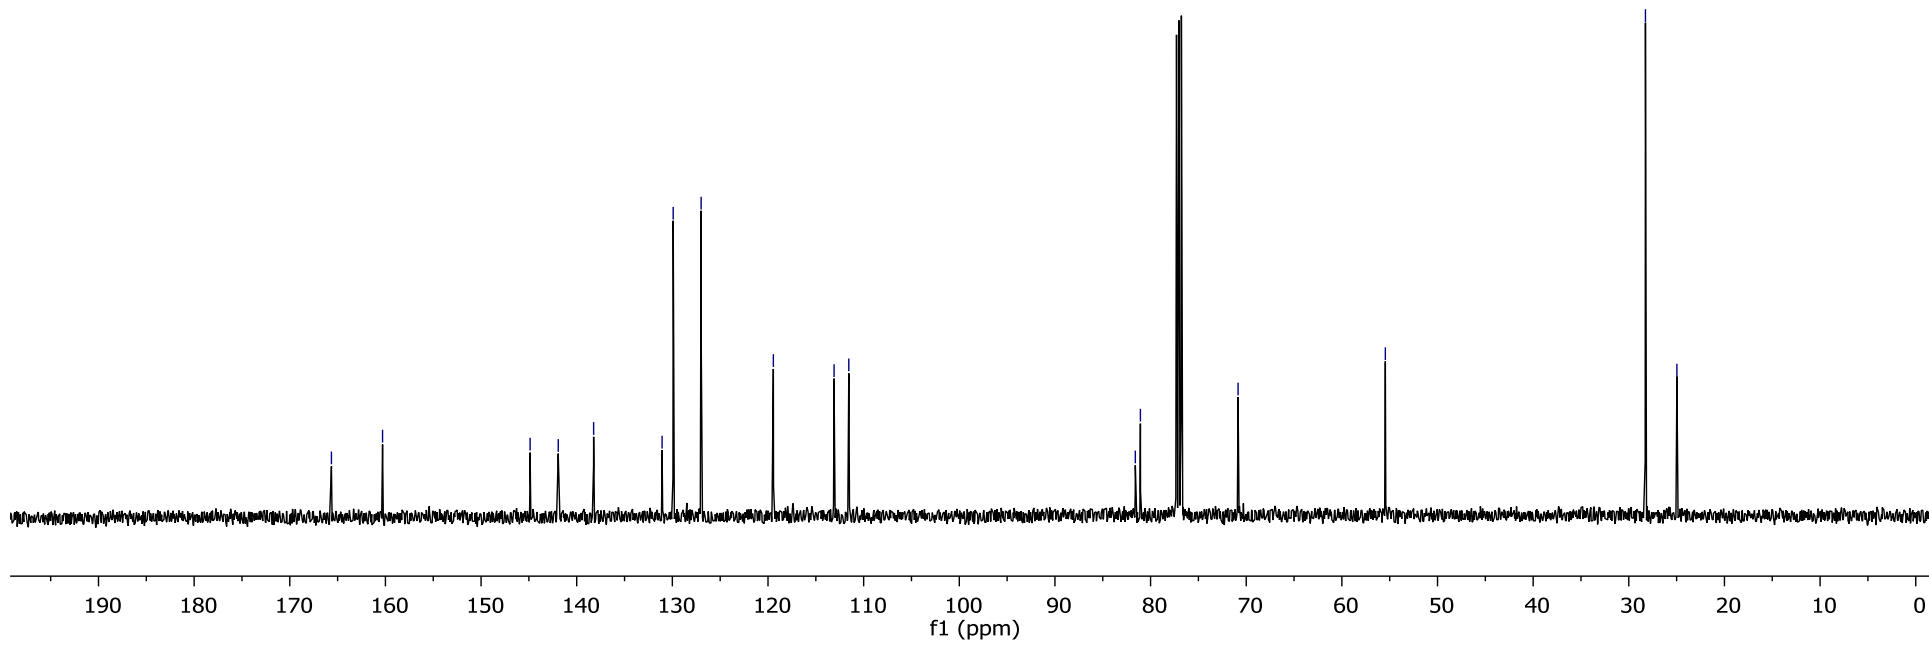

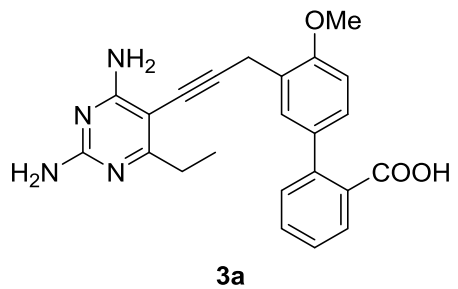

7.71  
 7.70  
 7.57  
 7.56  
 7.54  
 7.49  
 7.48  
 7.44  
 7.43  
 7.41  
 7.37  
 7.35  
 7.24  
 7.23  
 7.22  
 7.22  
 7.07  
 7.05  
 6.38  
 6.21

3.88  
3.85

2.55  
2.54  
2.52

1.06  
1.04  
1.03

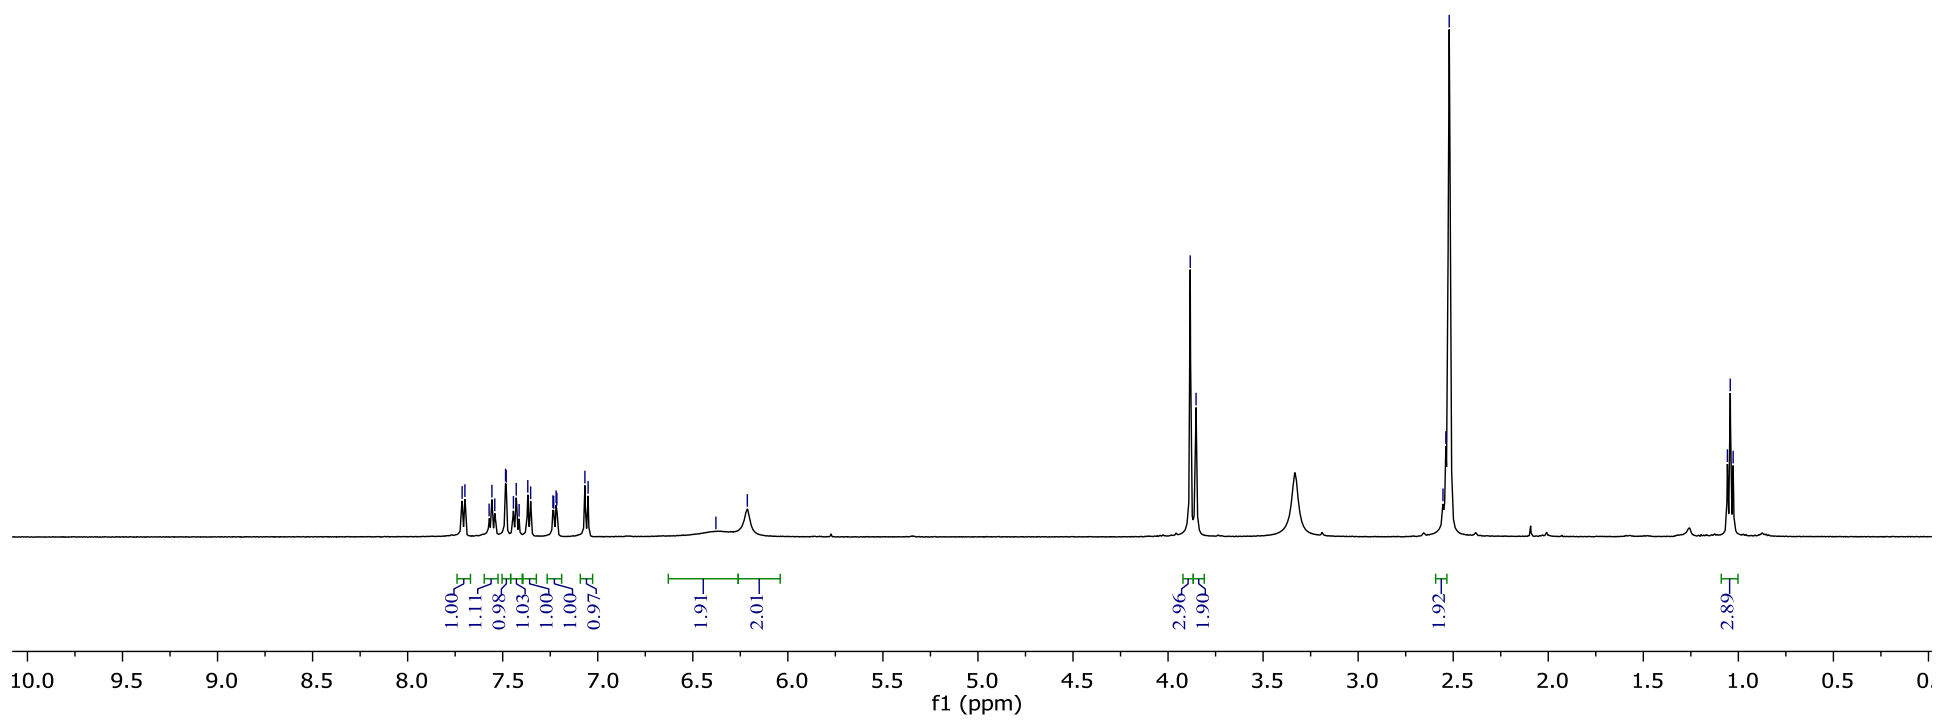

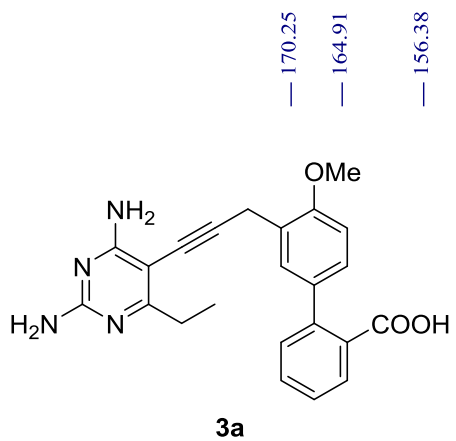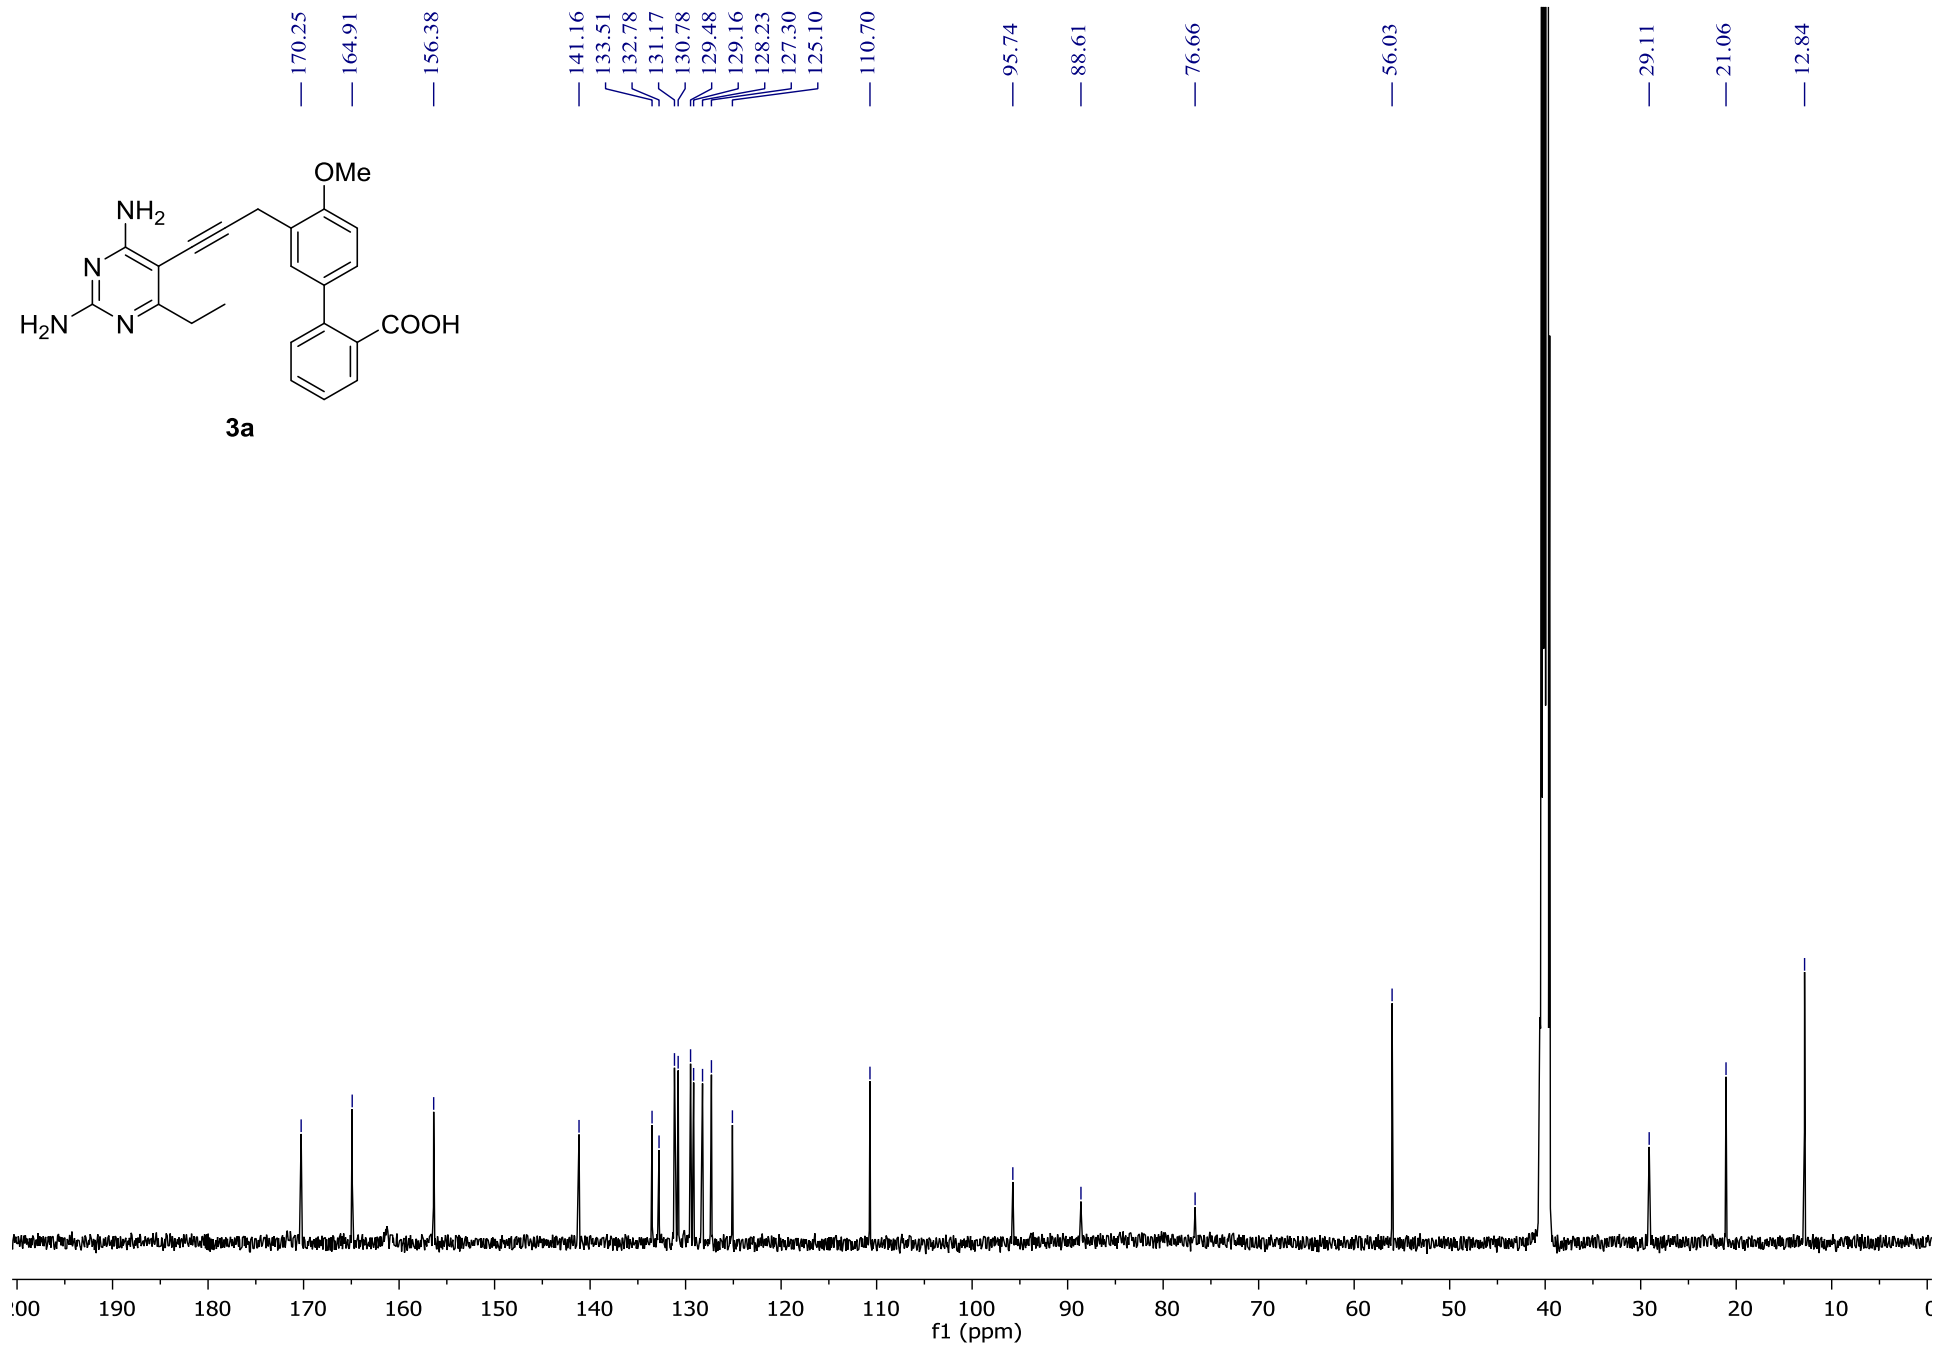

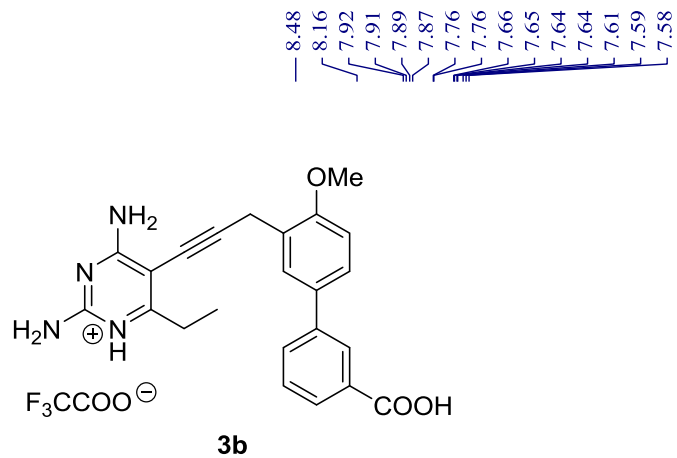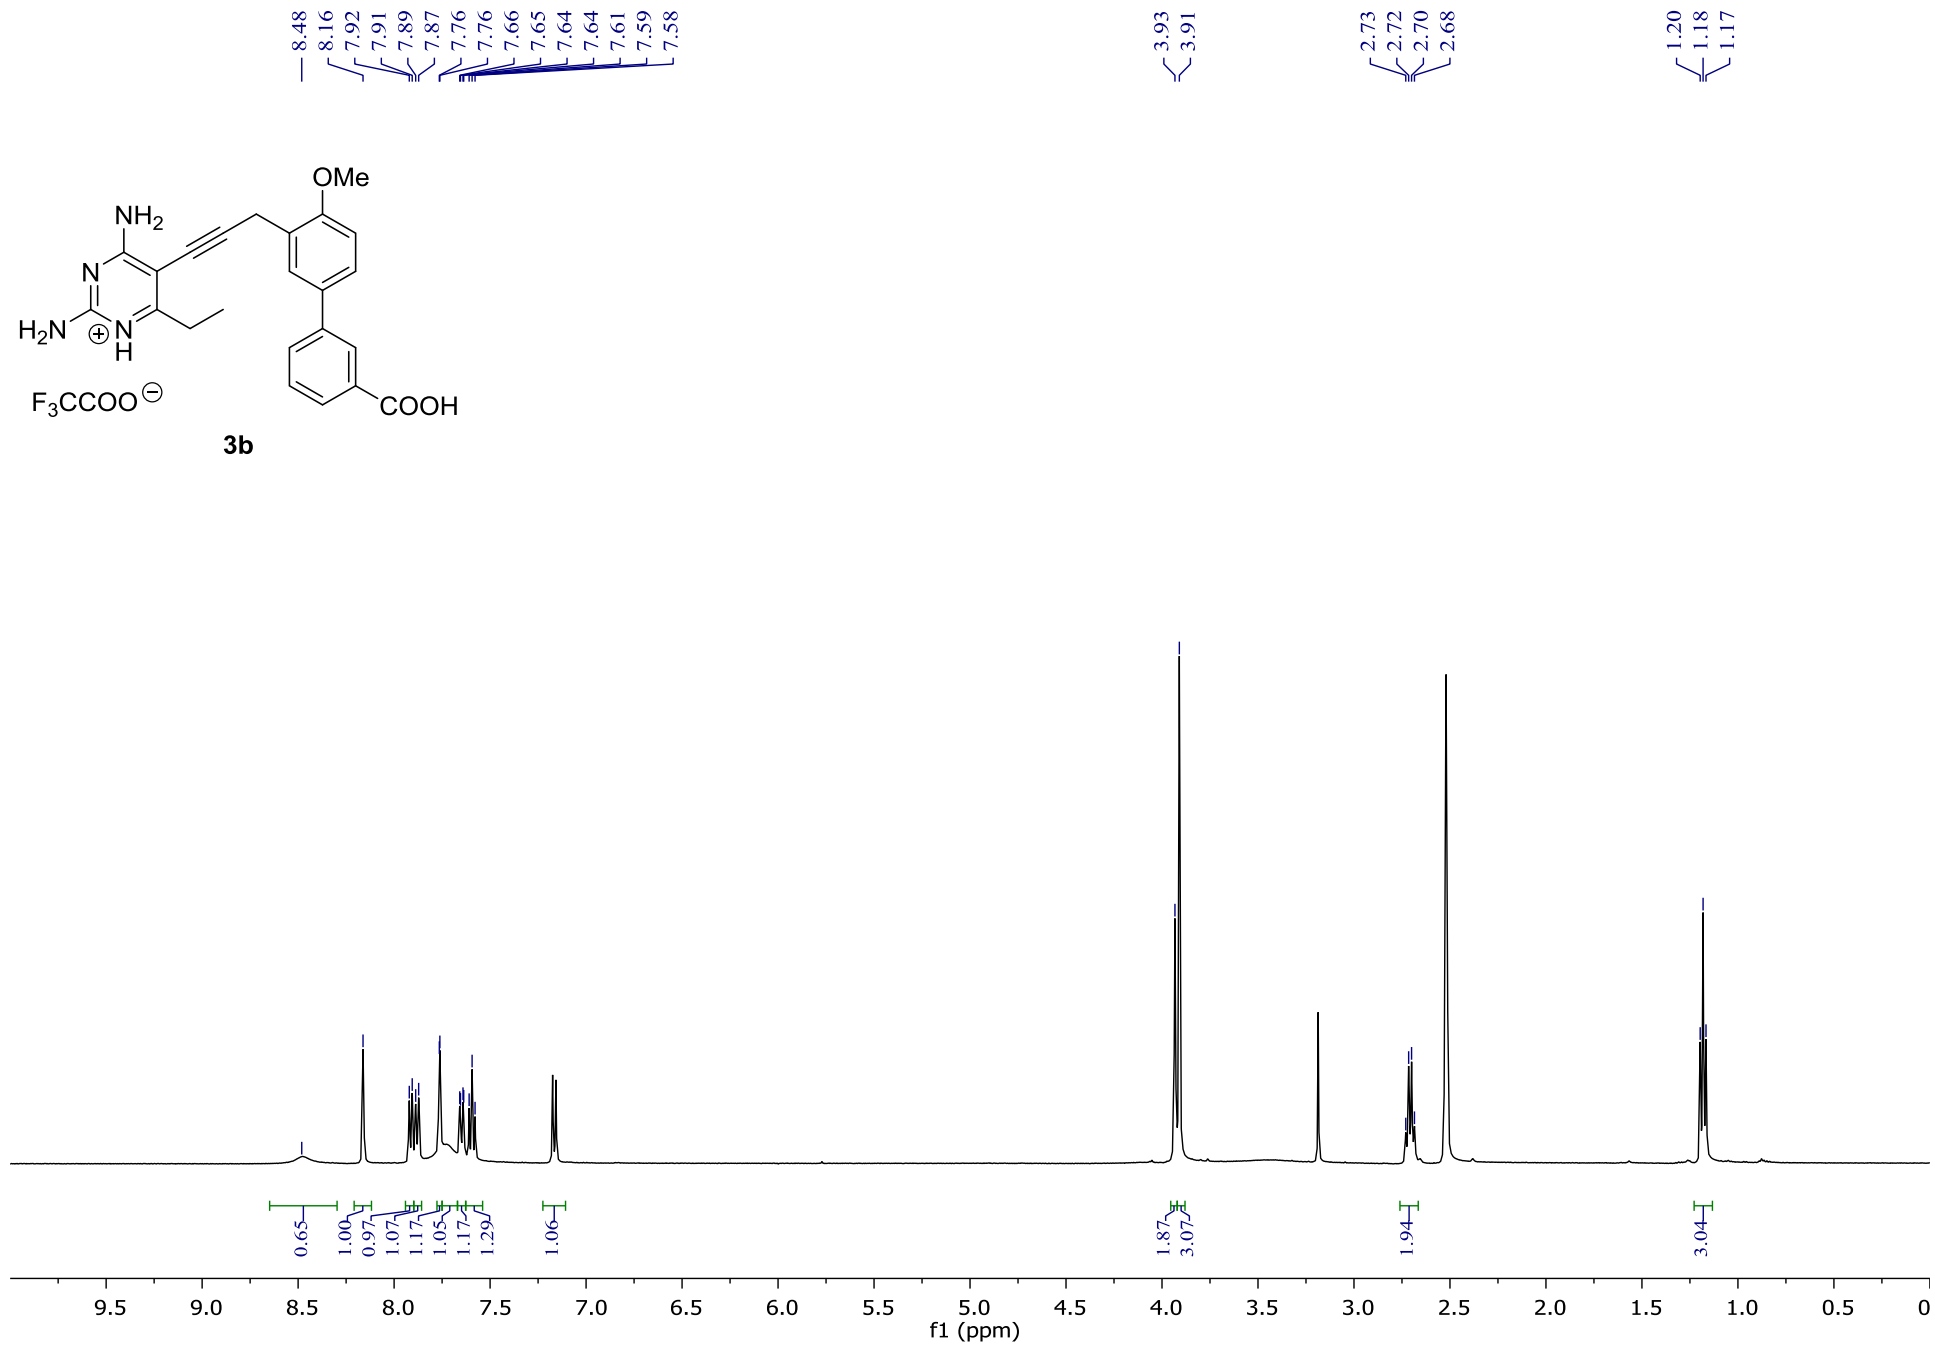



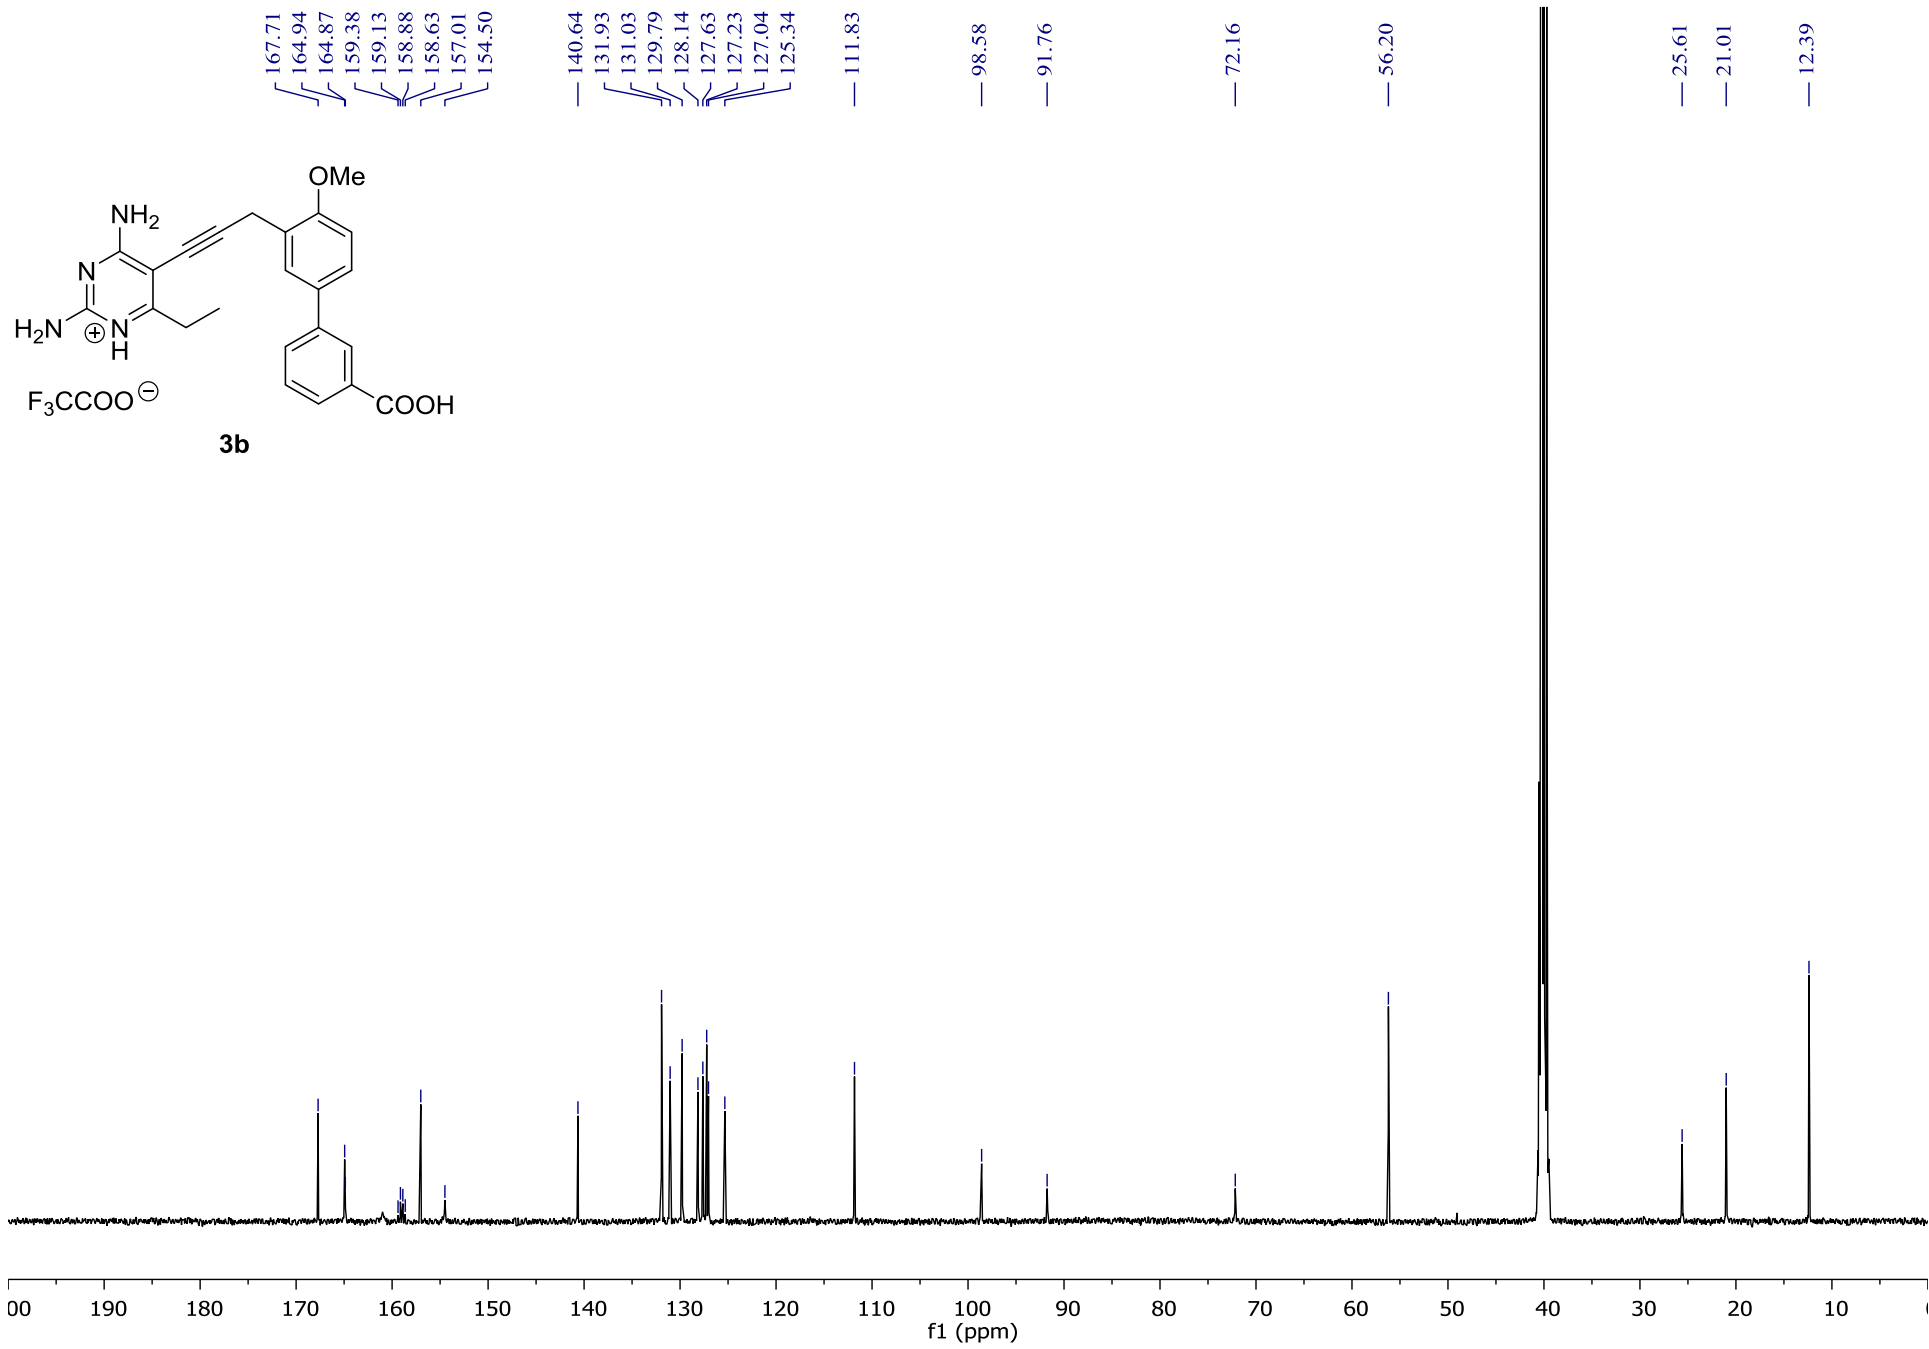

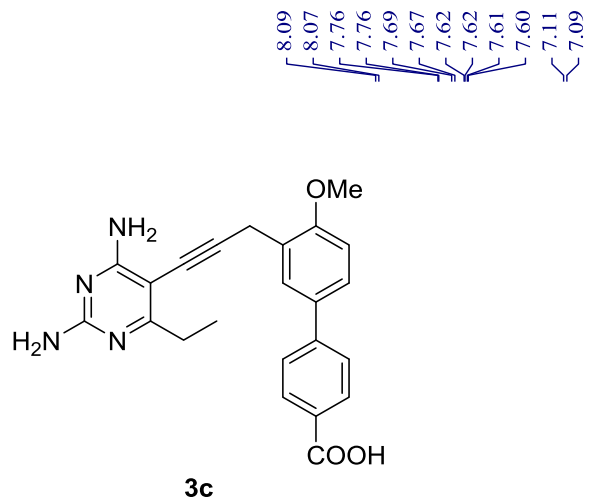

8.09  
8.07  
7.76  
7.76  
7.69  
7.67  
7.62  
7.62  
7.61  
7.60  
7.11  
7.09

3.95  
3.95

2.81  
2.80  
2.78  
2.77

1.29  
1.28  
1.26

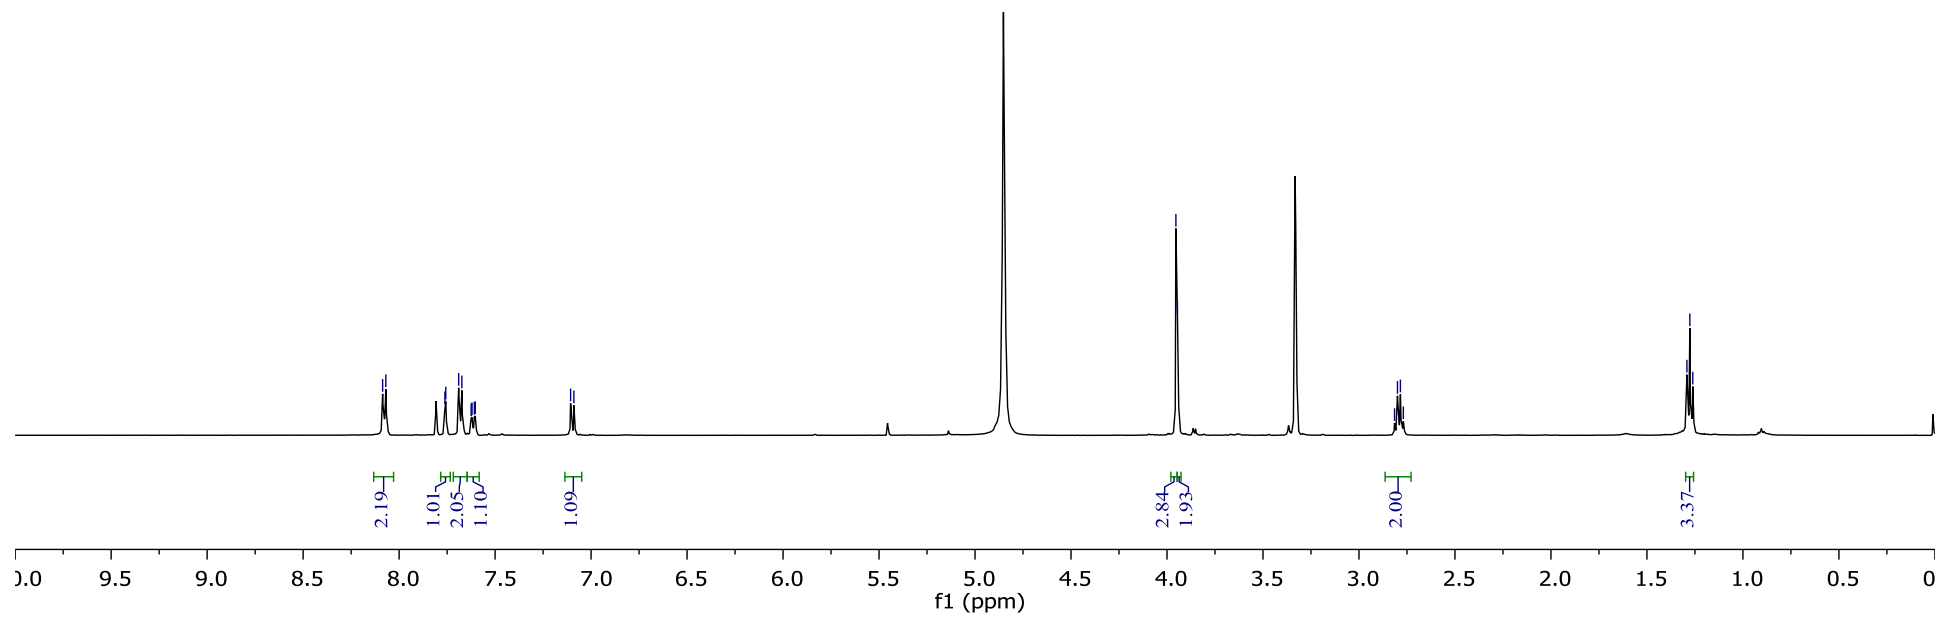

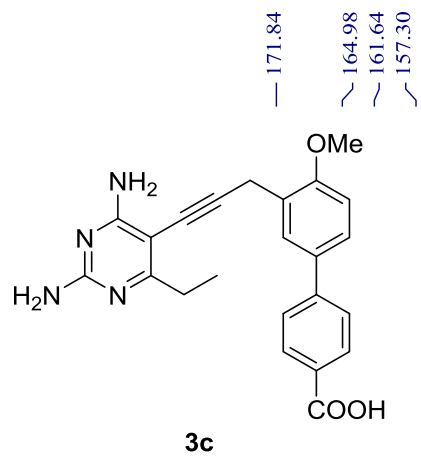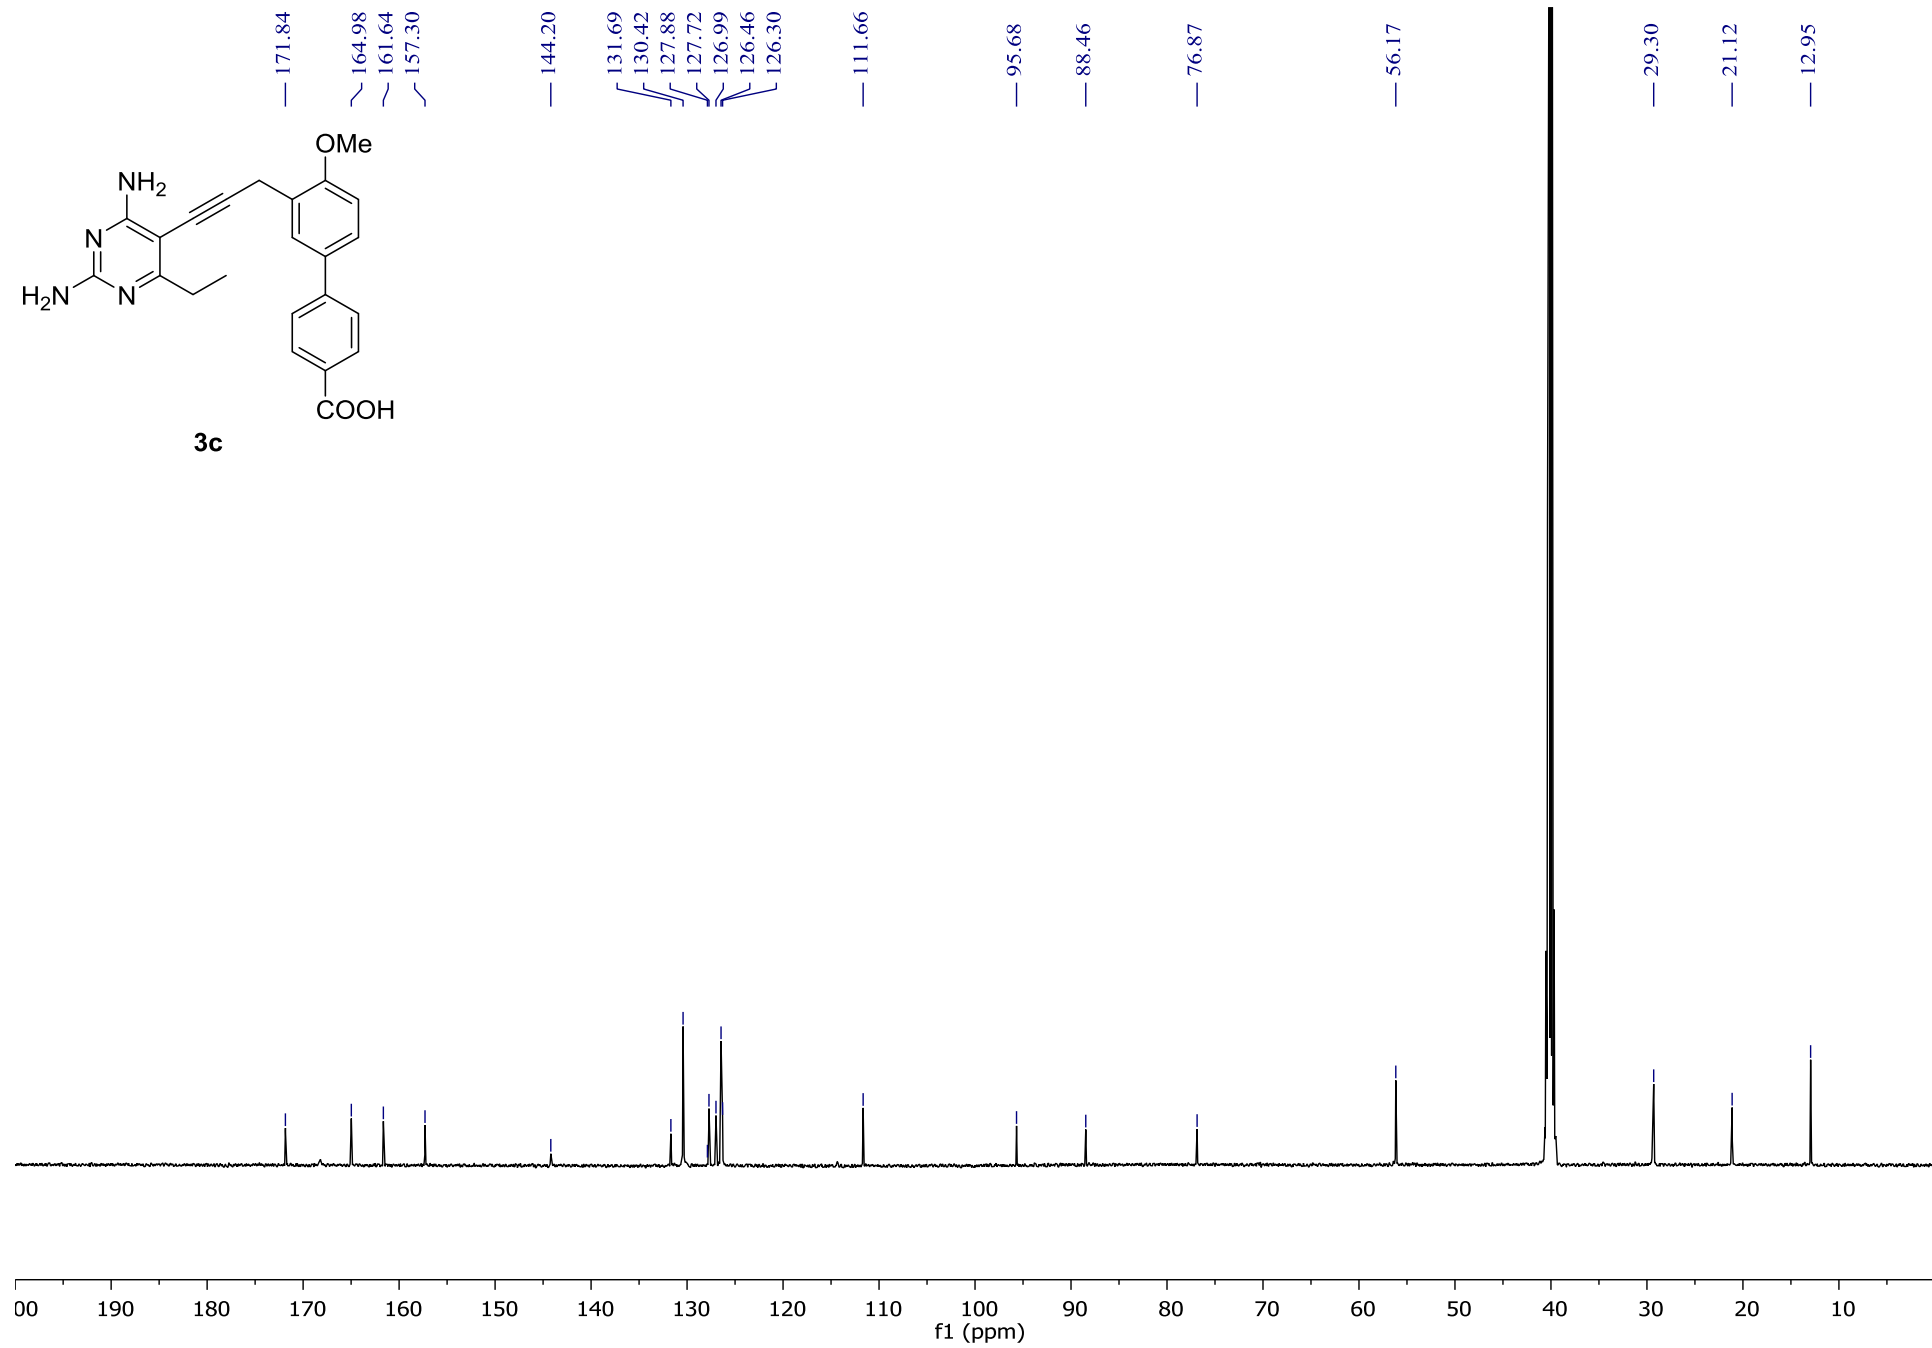

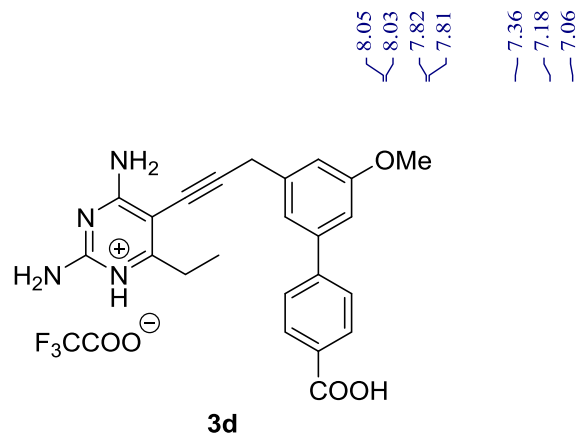

8.05  
8.03  
7.82  
7.81

7.36  
7.18  
7.06

4.01  
3.86

2.68  
2.66

1.19  
1.18  
1.16

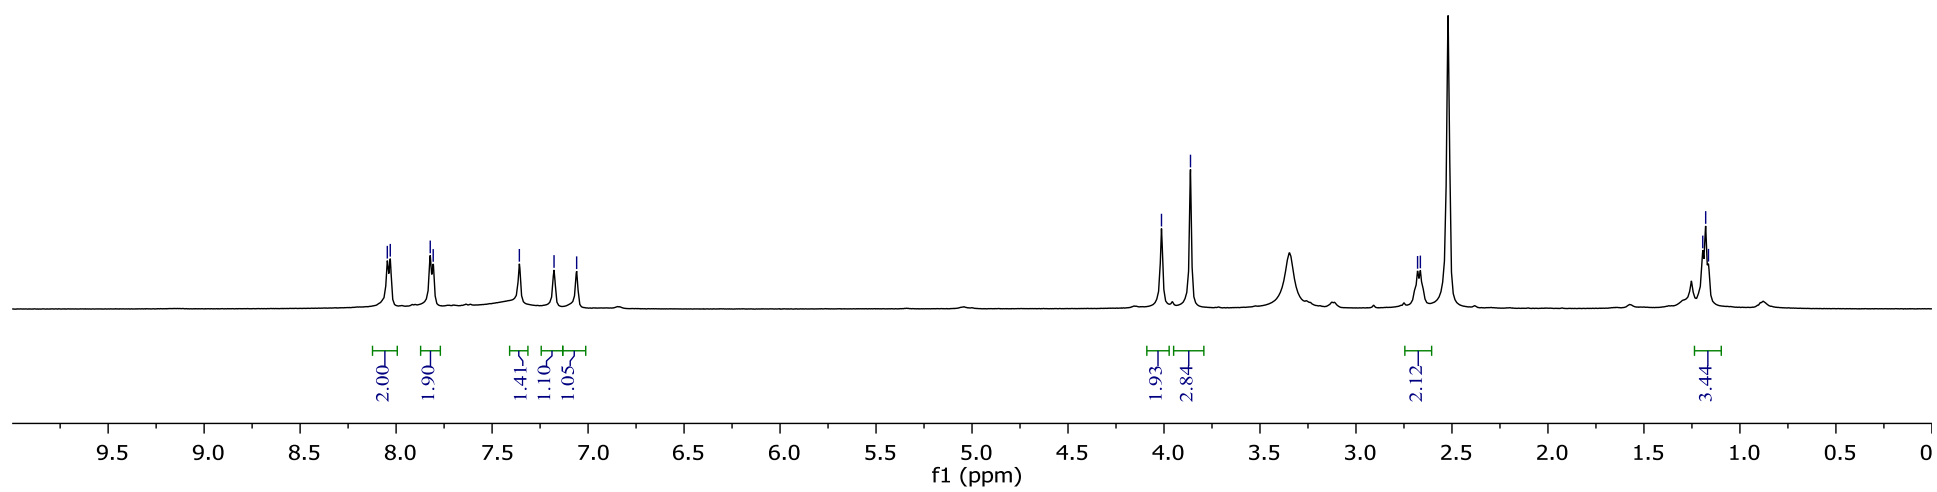

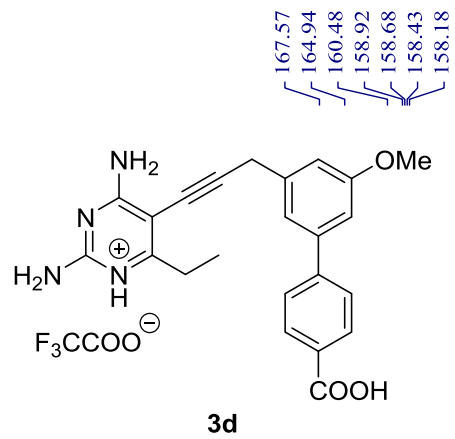

167.57  
 164.94  
 160.48  
 158.92  
 158.68  
 158.43  
 158.18

144.58  
 141.10  
 139.50

130.39  
 127.39

119.45  
 114.12  
 111.13

98.04

90.83

73.38

55.79

26.46  
 25.99

12.59

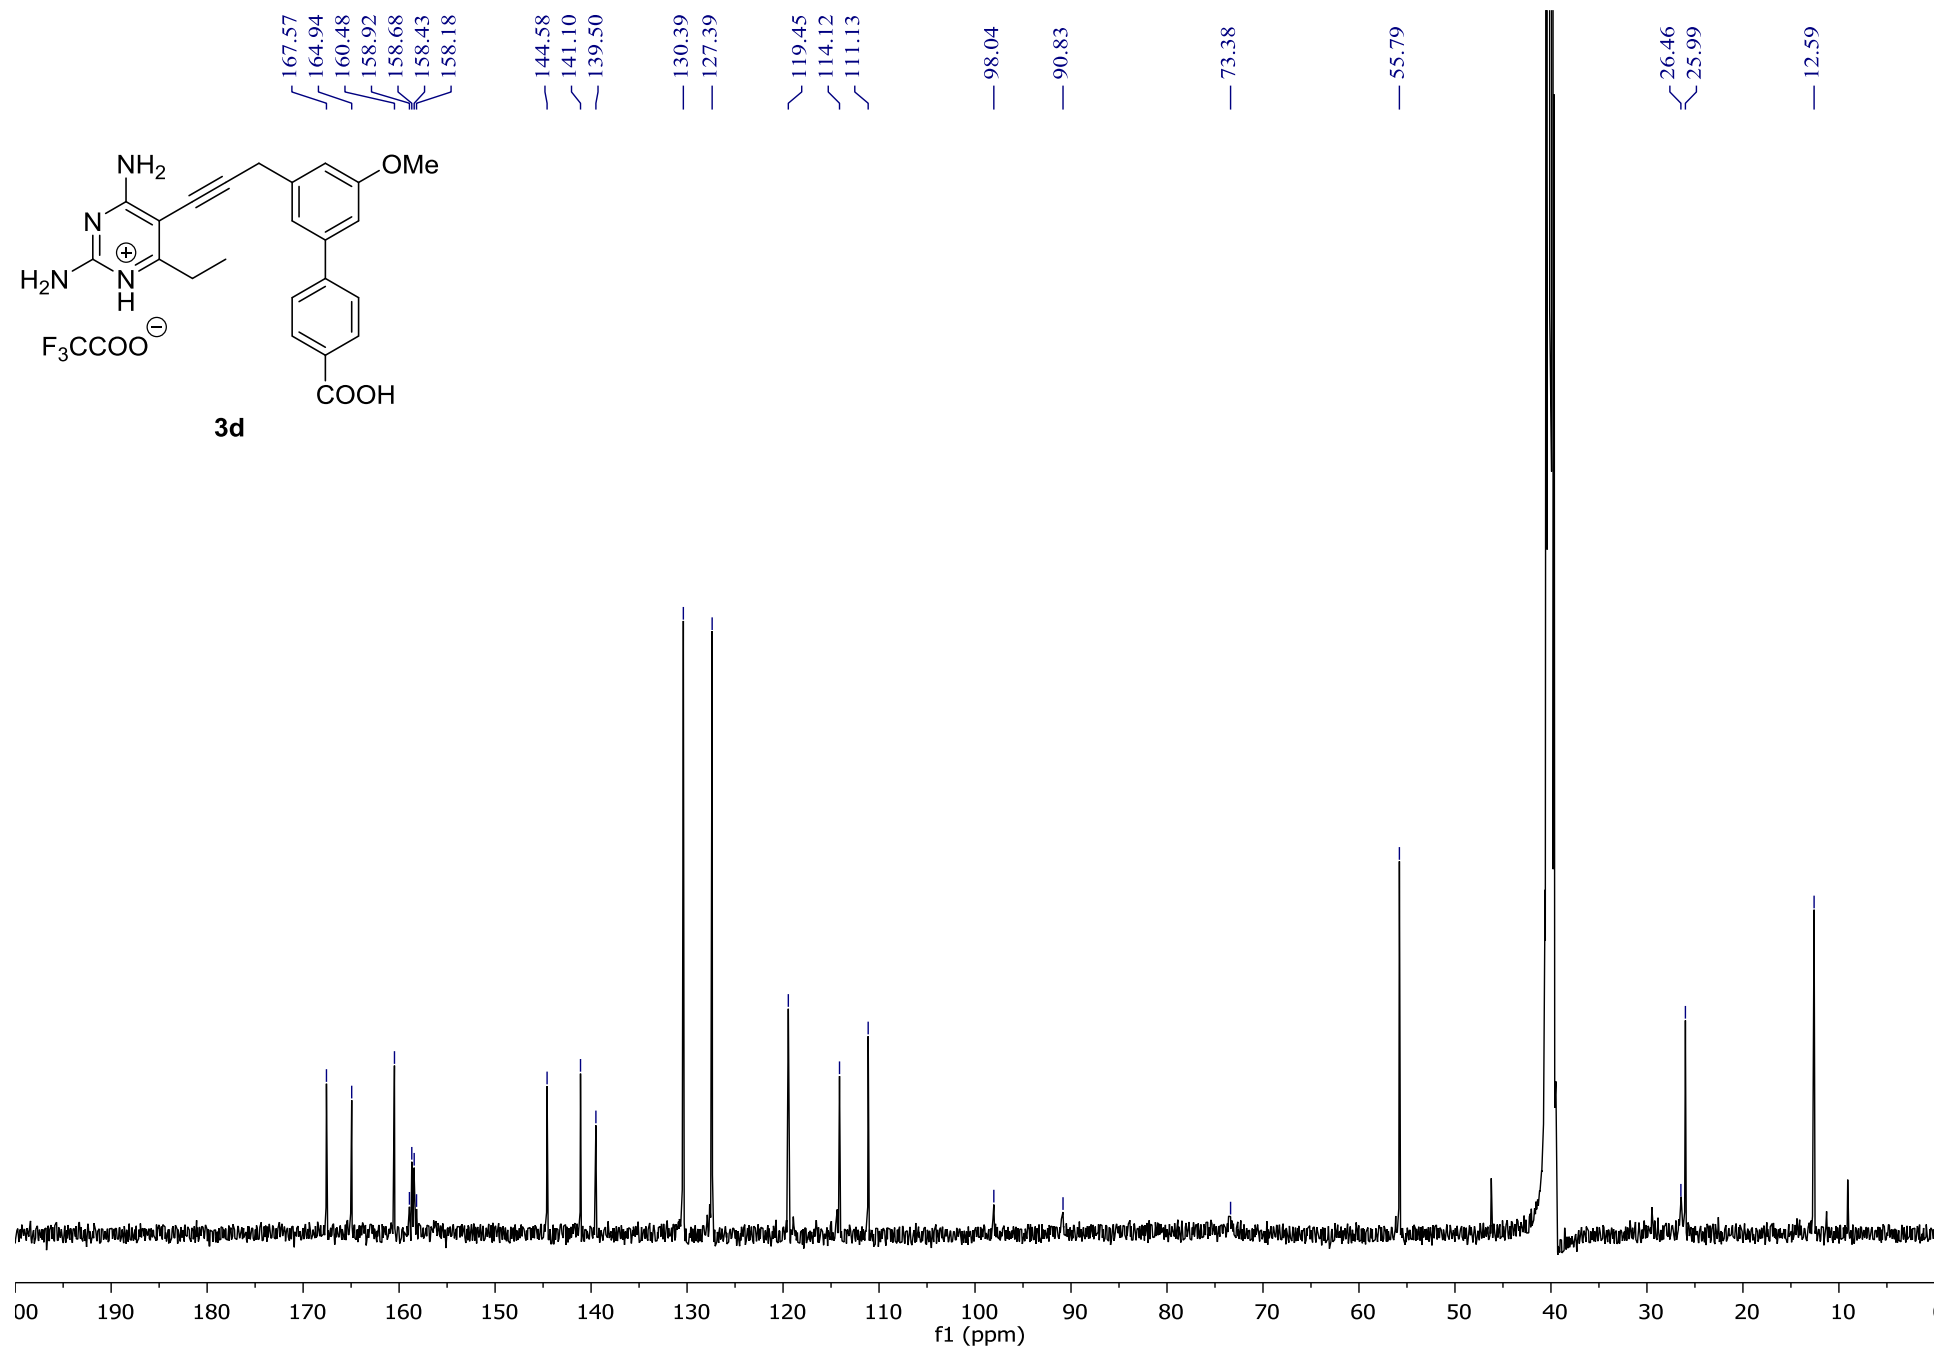

1H spectrum

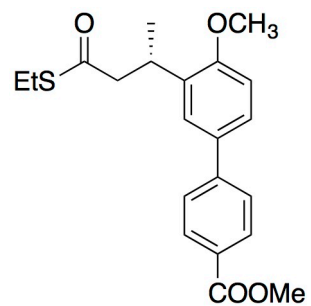

8.131  
8.114  
7.668  
7.664  
7.651  
7.516  
7.511  
7.499  
7.494  
7.468  
7.464  
7.307  
6.994  
6.977

3.983  
3.939  
3.833  
3.818  
3.805  
3.801  
3.792  
3.788  
3.775  
3.761  
3.048  
3.036  
3.018  
3.007  
2.922  
2.907  
2.892  
2.877  
2.851  
2.833  
2.822  
2.804  
1.630  
1.385  
1.371  
1.263  
1.248  
1.233

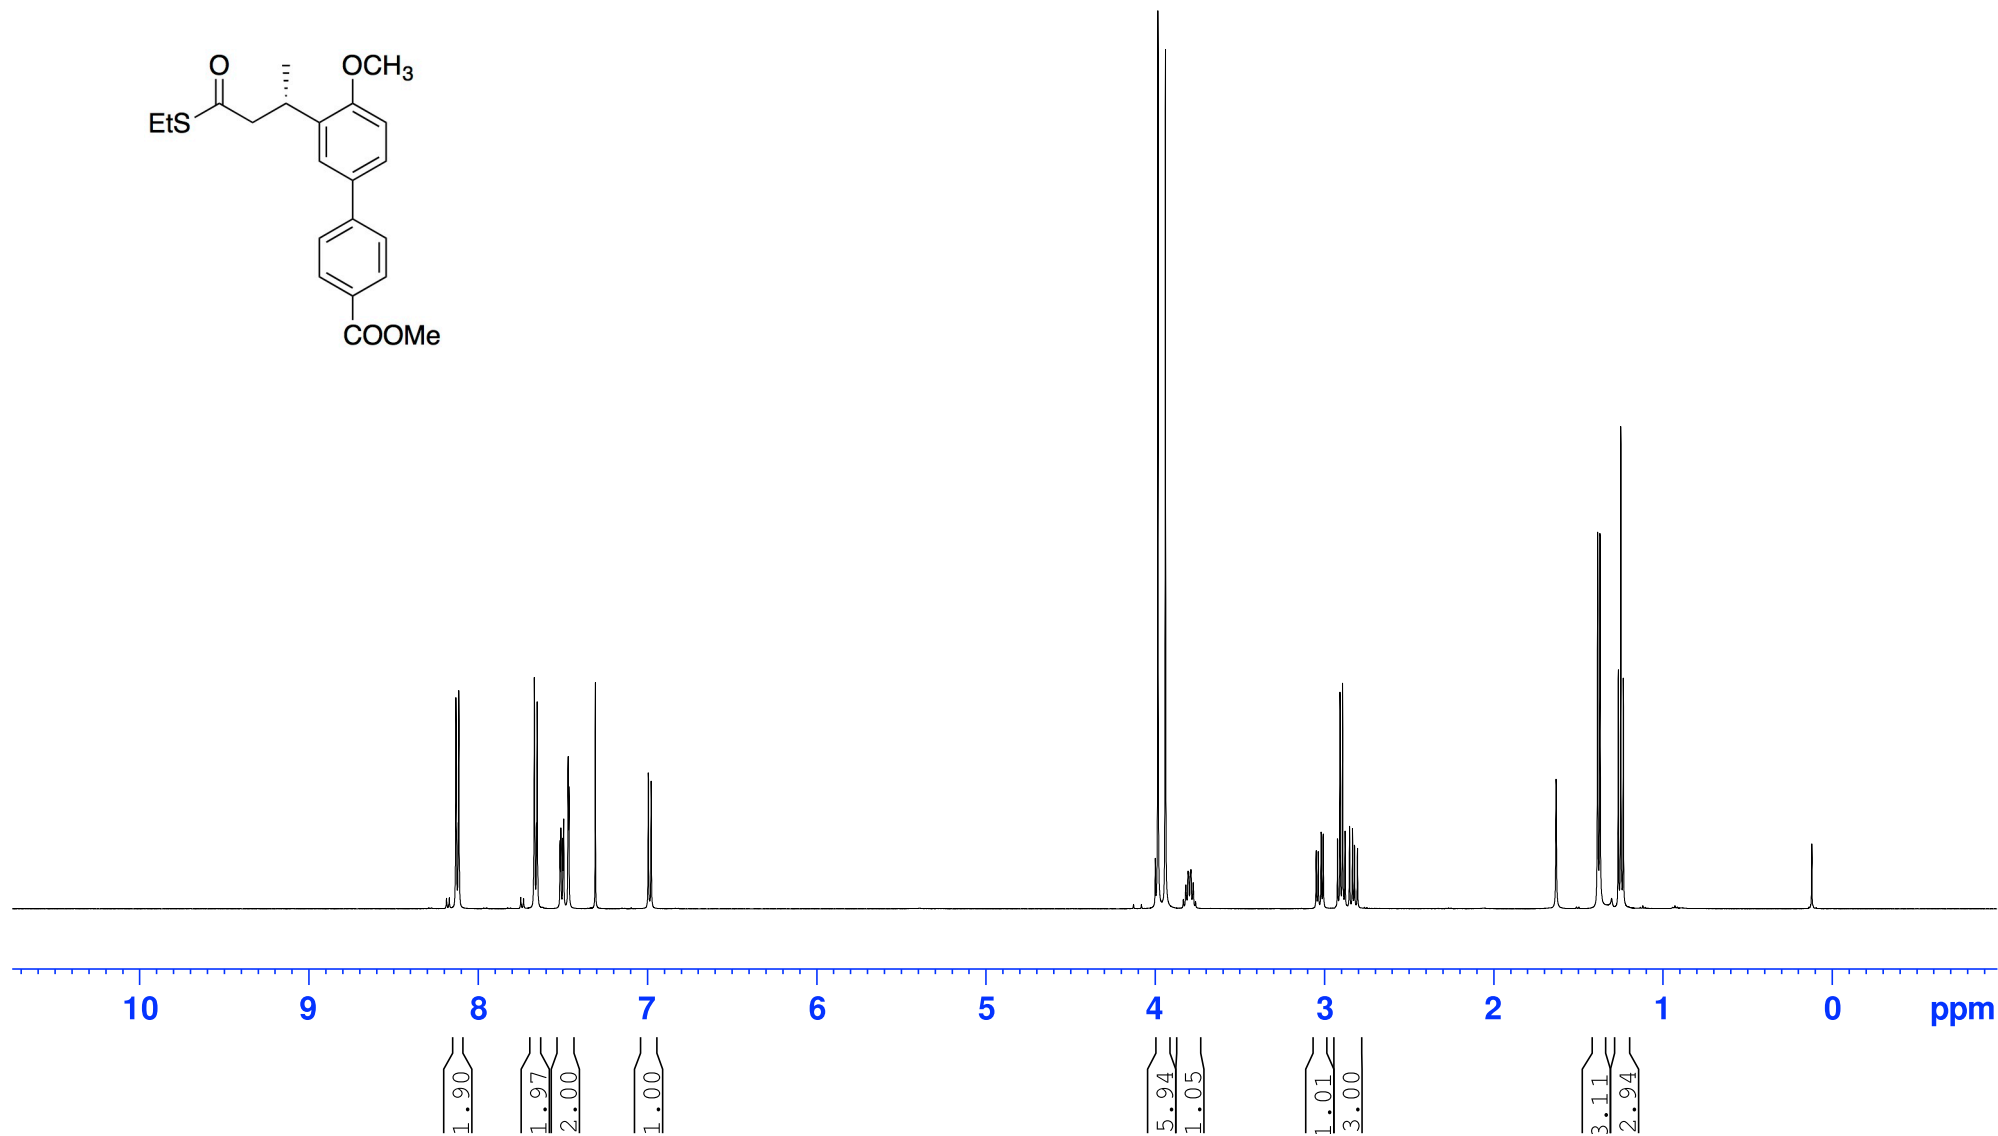

1D <sup>13</sup>C spectrum

Probe: 5 mm PABBO BB-1H/D Z-GRD Z113652/0192

— 198.595  
— 167.118  
— 157.295  
— 145.518  
— 134.005  
— 132.256  
— 130.102  
— 128.235  
— 126.562  
— 126.228  
— 126.186  
— 111.005  
  
— 55.557  
— 52.089  
— 50.492  
  
— 31.234  
— 23.319  
— 19.755  
— 14.796

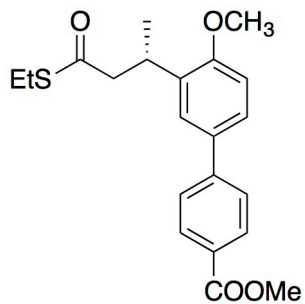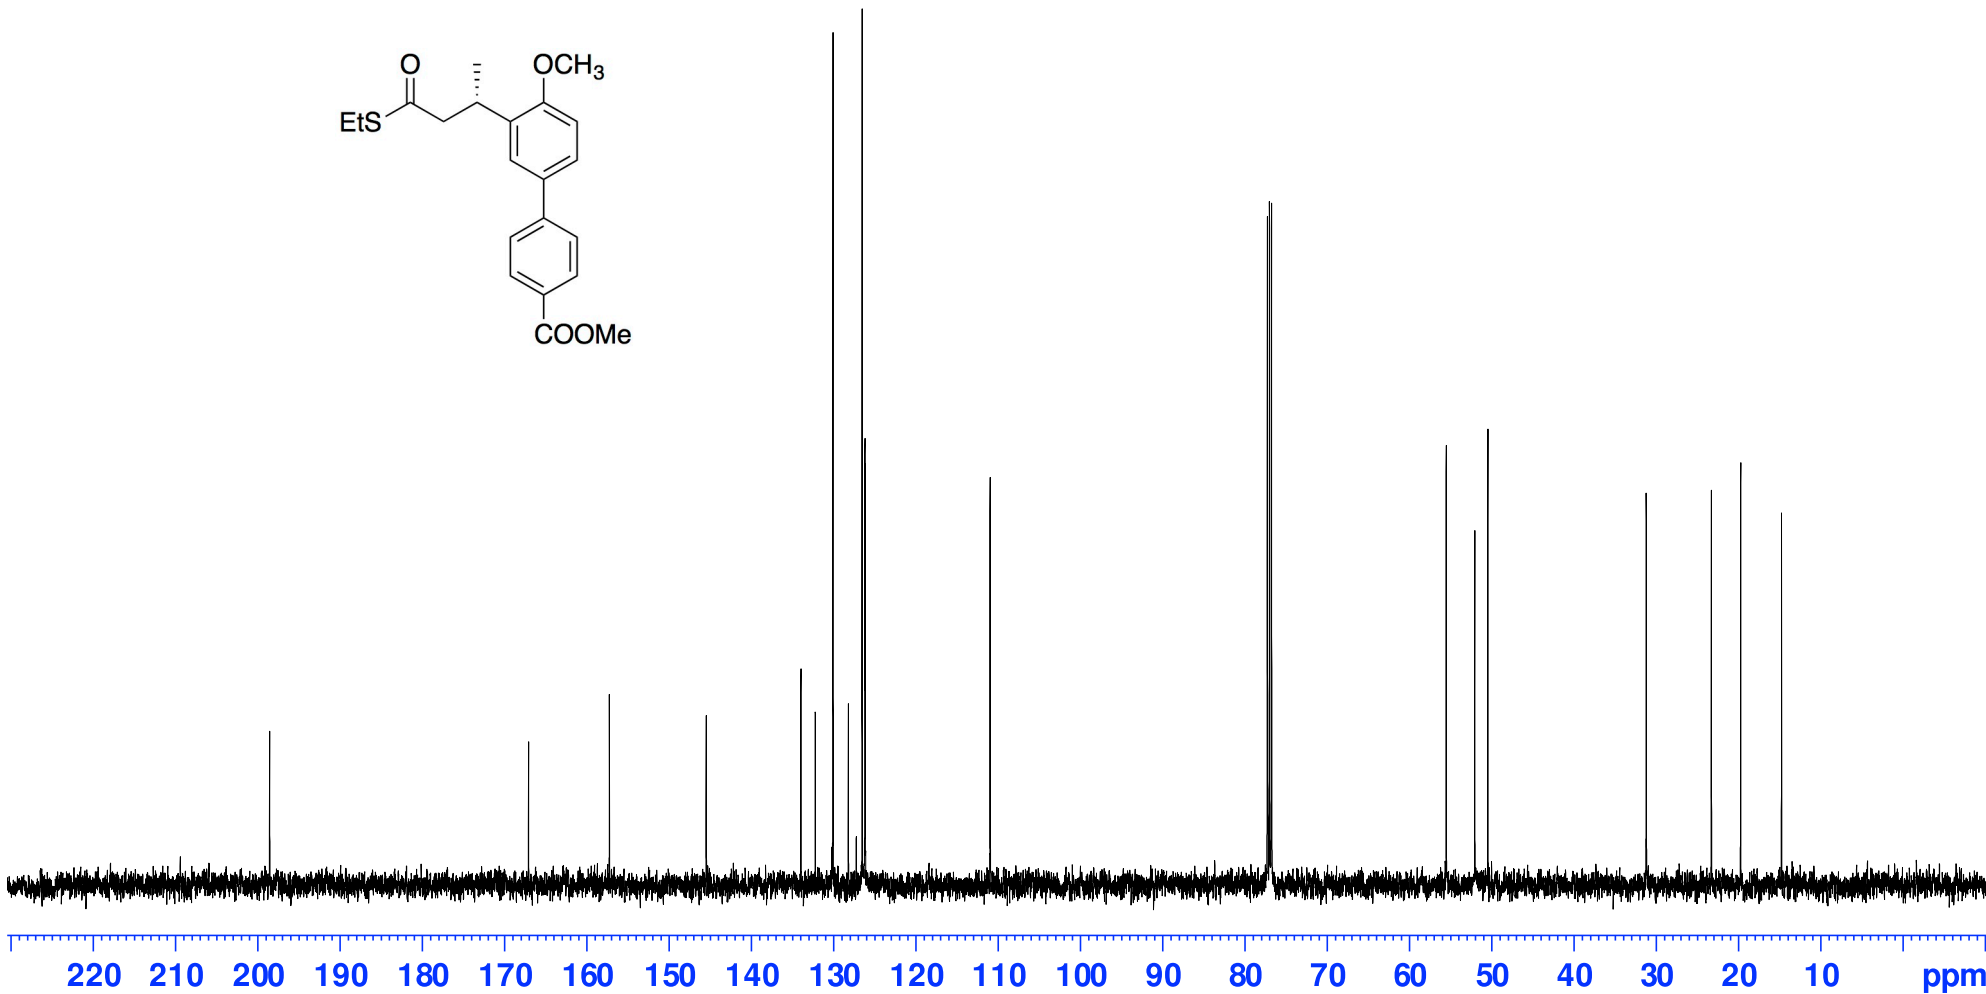

<sup>1</sup>H spectrum

9.772  
8.126  
8.122  
8.112  
8.109  
8.105  
7.656  
7.652  
7.649  
7.639  
7.635  
7.632  
7.508  
7.504  
7.492  
7.487  
7.482  
7.477  
6.986  
6.969

3.965  
3.913  
3.856  
3.842  
3.828  
3.813  
2.846  
2.841  
2.833  
2.829  
2.813  
2.809  
2.800  
2.796  
2.732  
2.727  
2.716  
2.711  
2.699  
2.694  
2.684  
2.679  
1.405  
1.391

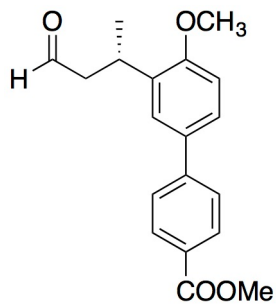

6S

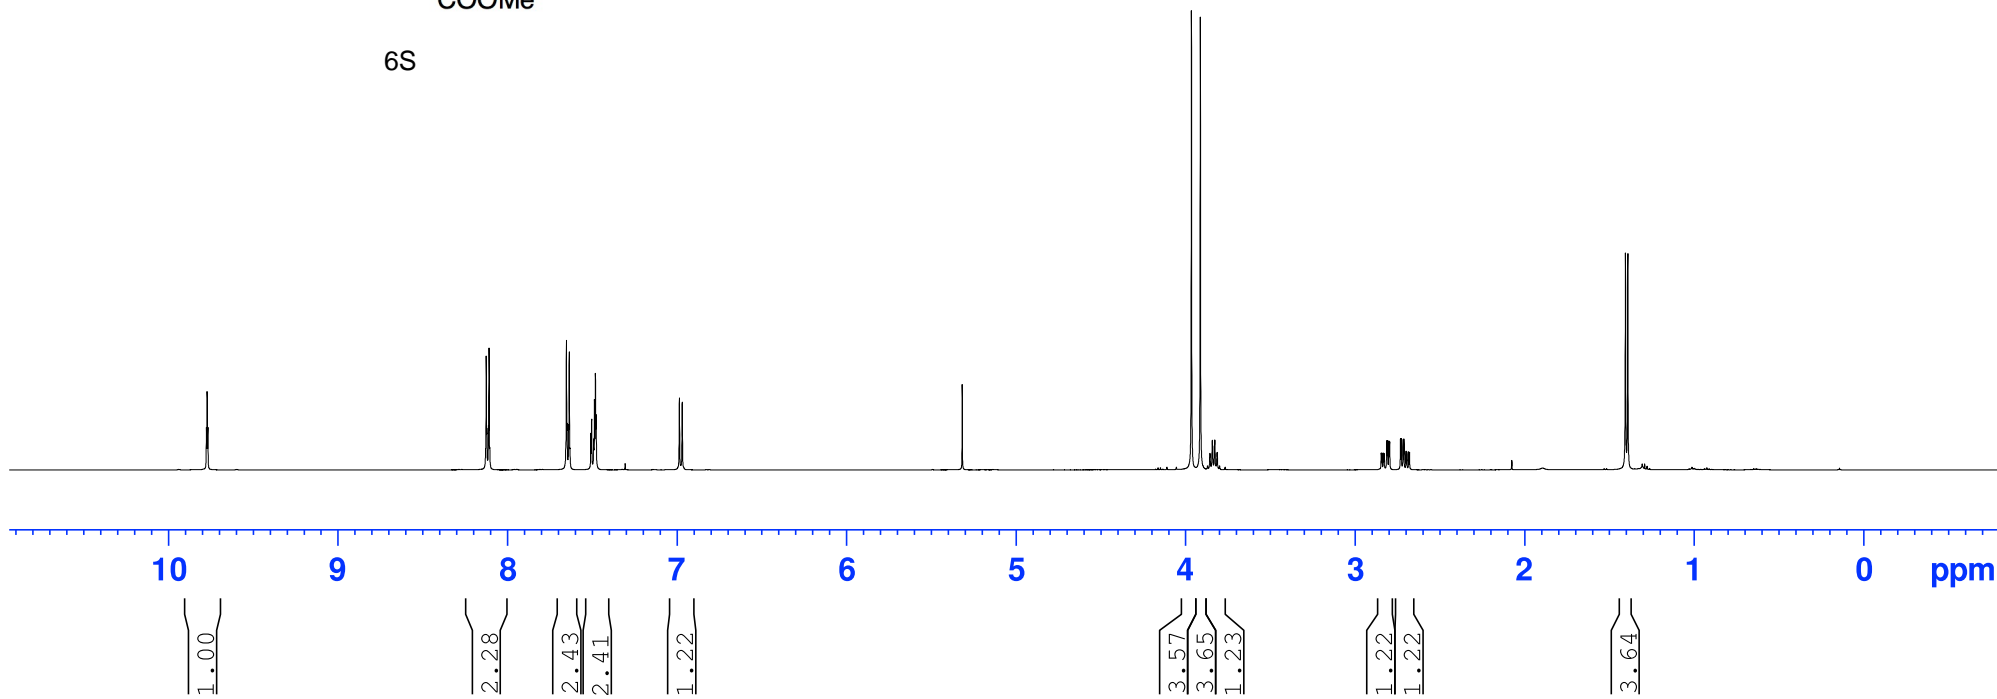



1D <sup>13</sup>C spectrum

Probe: 5 mm PABBO BB-1H/D

Z-GRD Z113652/0192

— 202.265

— 167.041

— 157.063

— 145.398

— 133.956

— 132.453

— 130.119

— 128.319

— 126.560

— 126.350

— 125.999

— 111.026

— 55.487

— 52.065

— 50.588

— 28.077

— 20.351

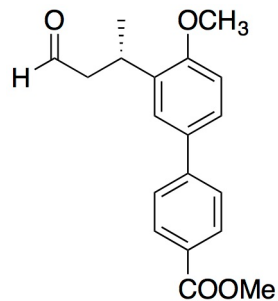

6S

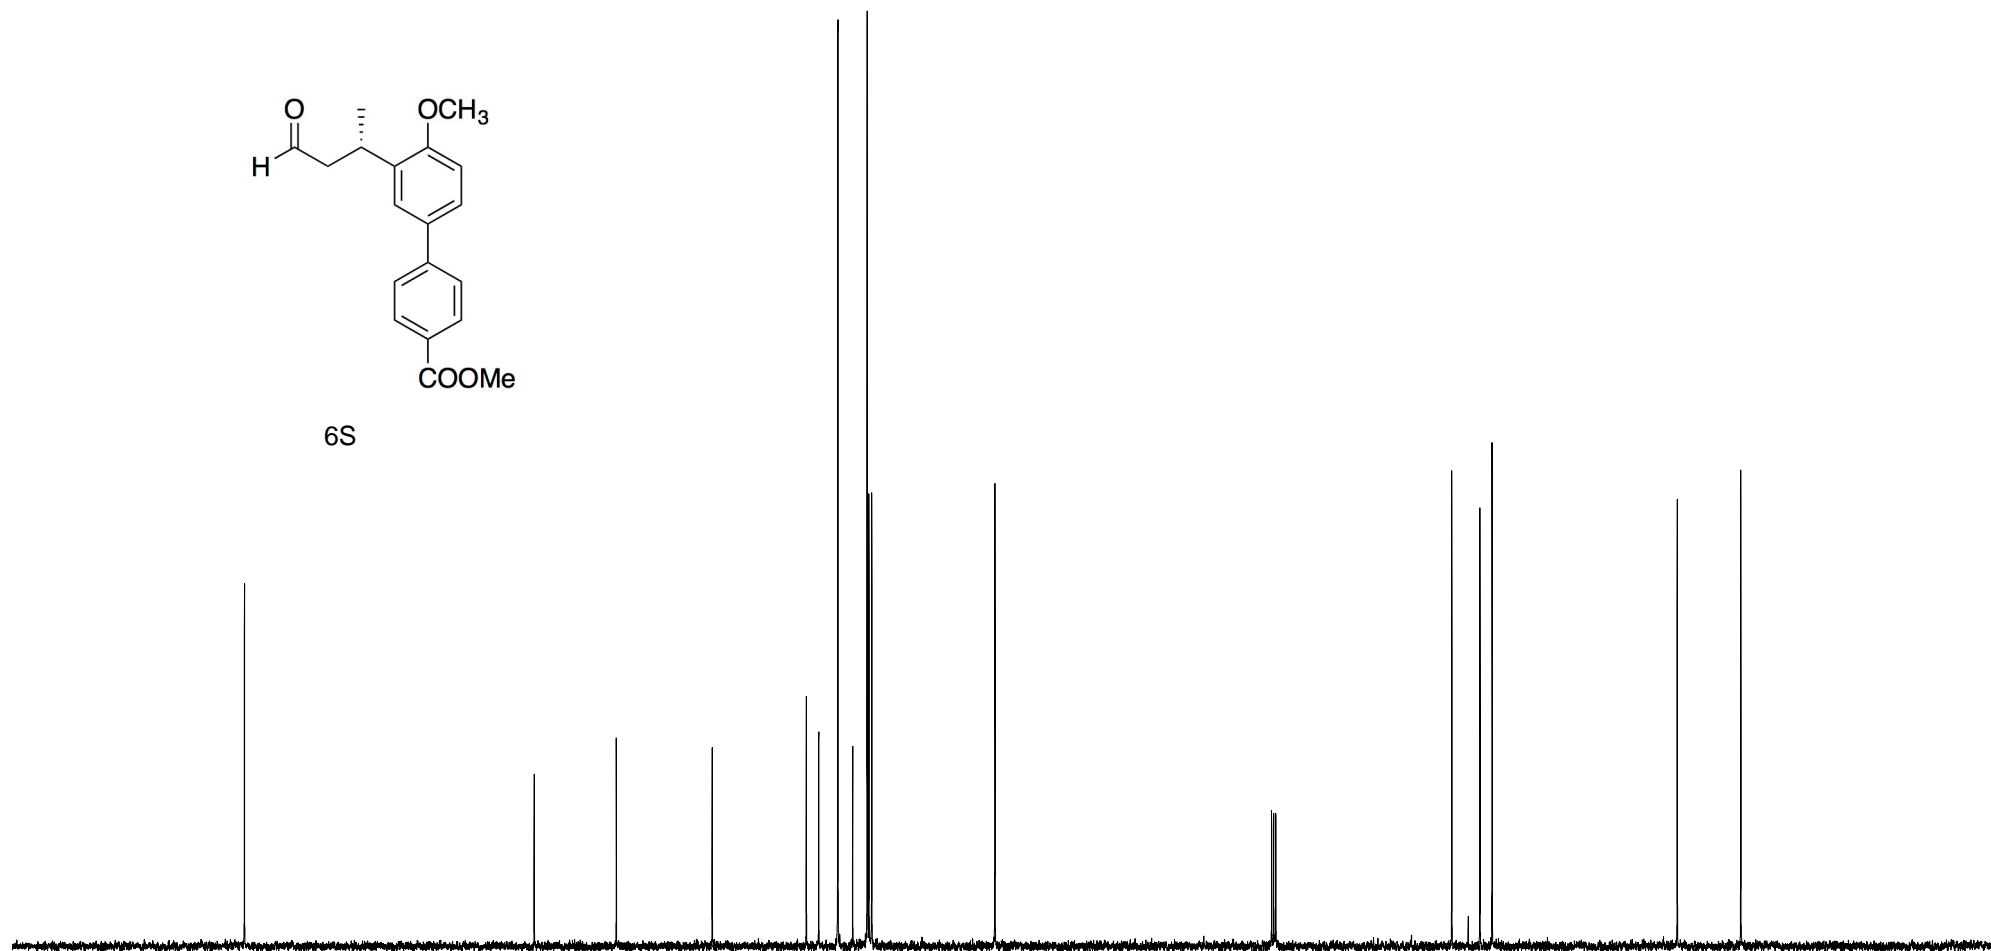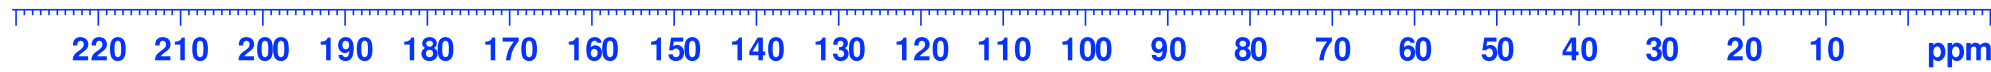

1H spectrum

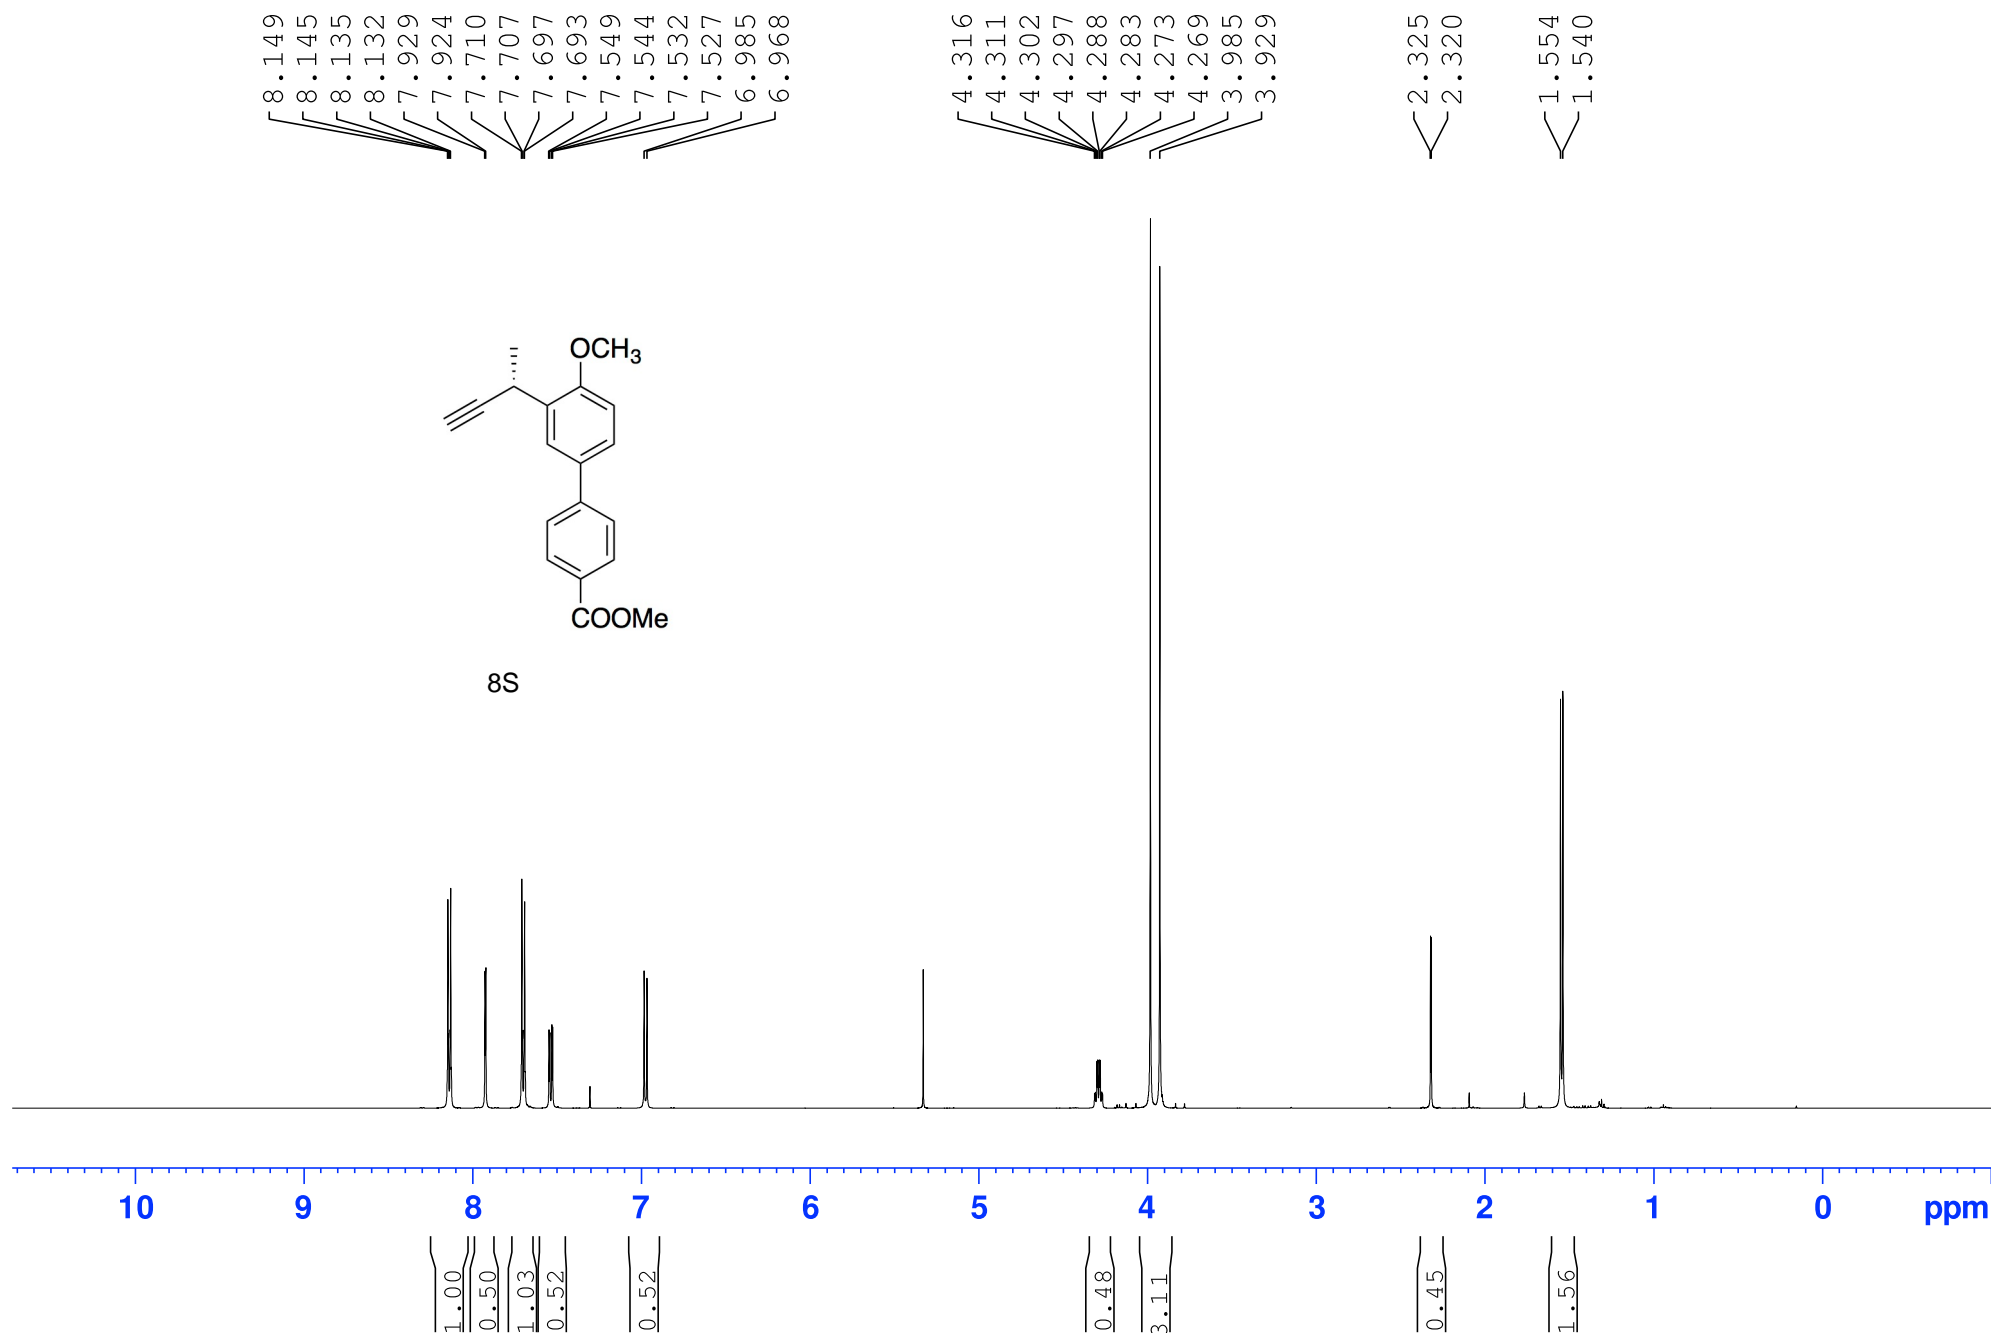

1D <sup>13</sup>C spectrum

Probe: 5 mm PABBO BB-1H/D Z-GRD Z113652/0192

— 167.095  
— 156.361  
— 145.391  
— 132.438  
— 131.559  
— 130.120  
— 128.291  
— 126.713  
— 126.587  
— 110.844

— 87.291  
— 77.368  
— 77.114  
— 76.859  
— 69.890  
— 55.611  
— 52.076

— 25.563  
— 22.749

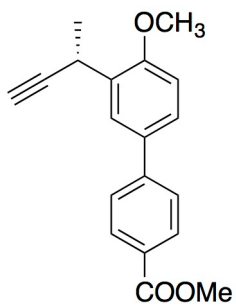

8S

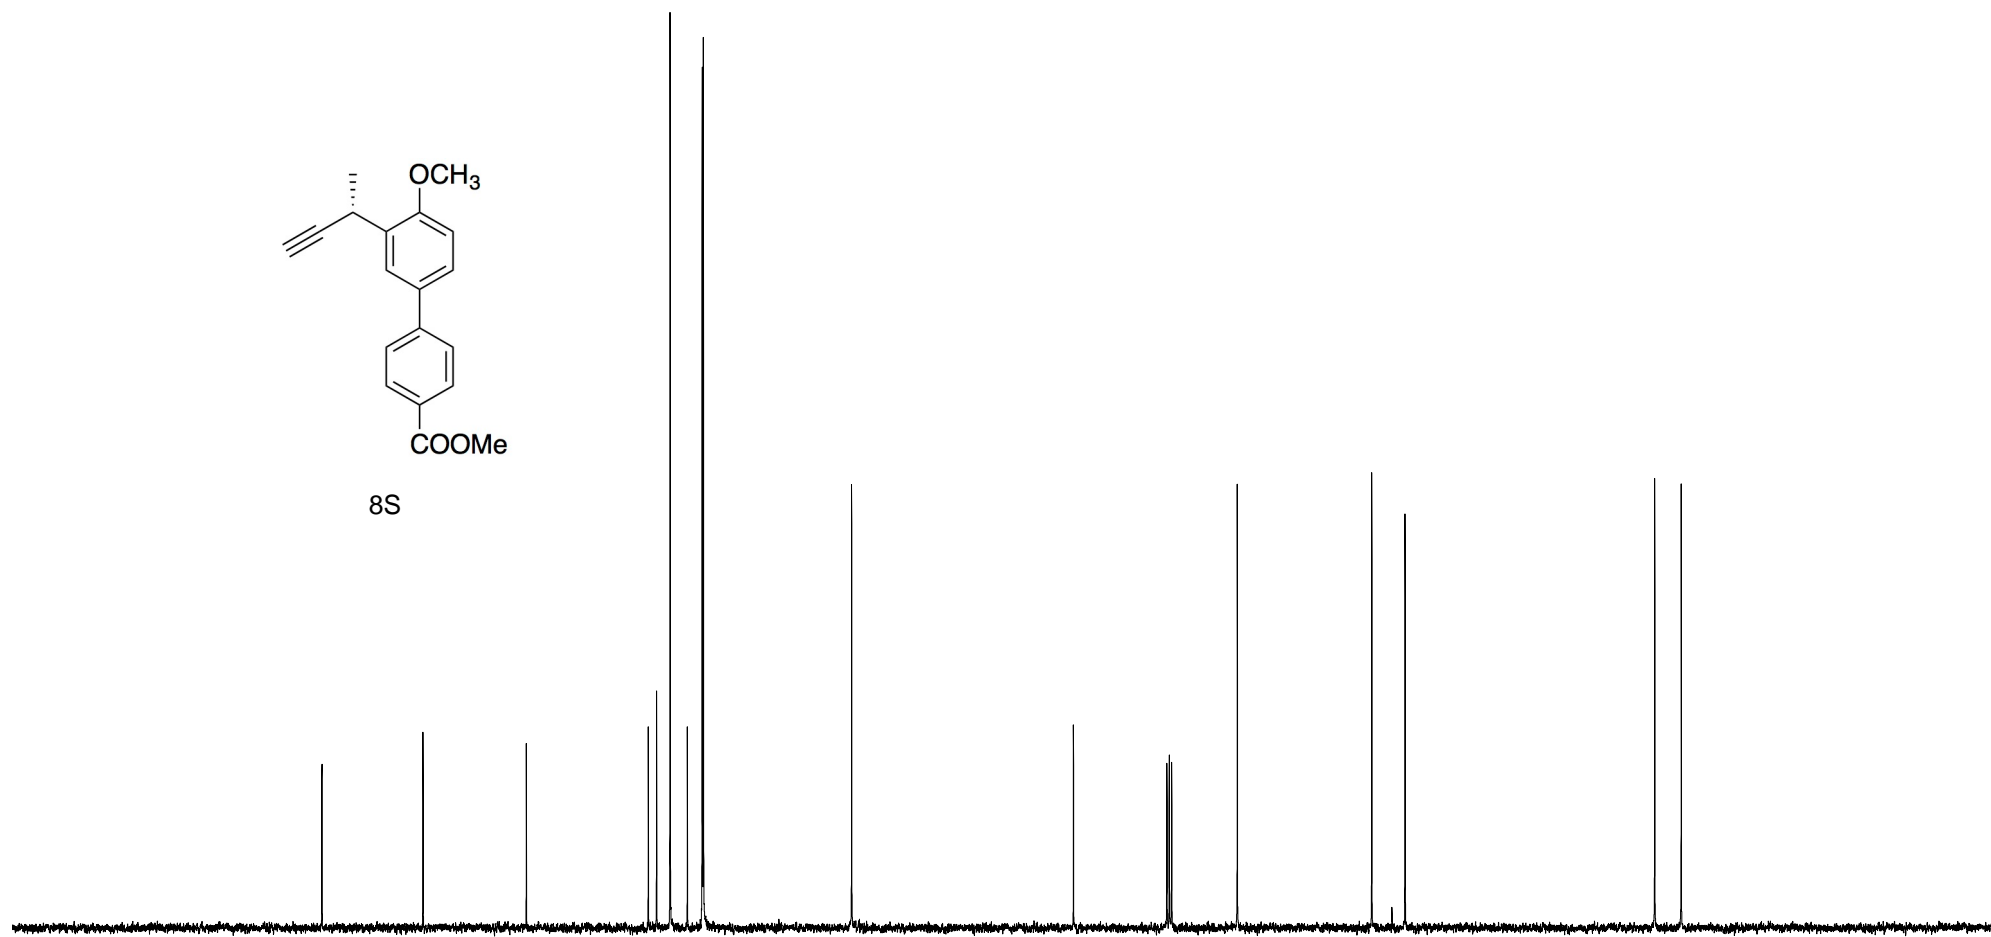

190 180 170 160 150 140 130 120 110 100 90 80 70 60 50 40 30 20 10 0 ppm

<sup>1</sup>H spectrum

8.128  
8.114  
8.111  
7.898  
7.894  
7.684  
7.667  
7.574  
7.569  
7.557  
7.552  
7.029  
7.012

5.178  
5.164  
4.842  
4.536  
4.522  
4.508  
4.494  
3.978  
3.967

2.786  
2.771  
2.756  
2.741

1.625  
1.611  
1.285  
1.270  
1.255

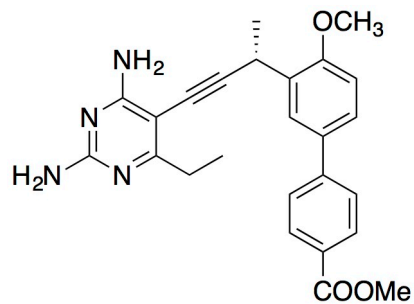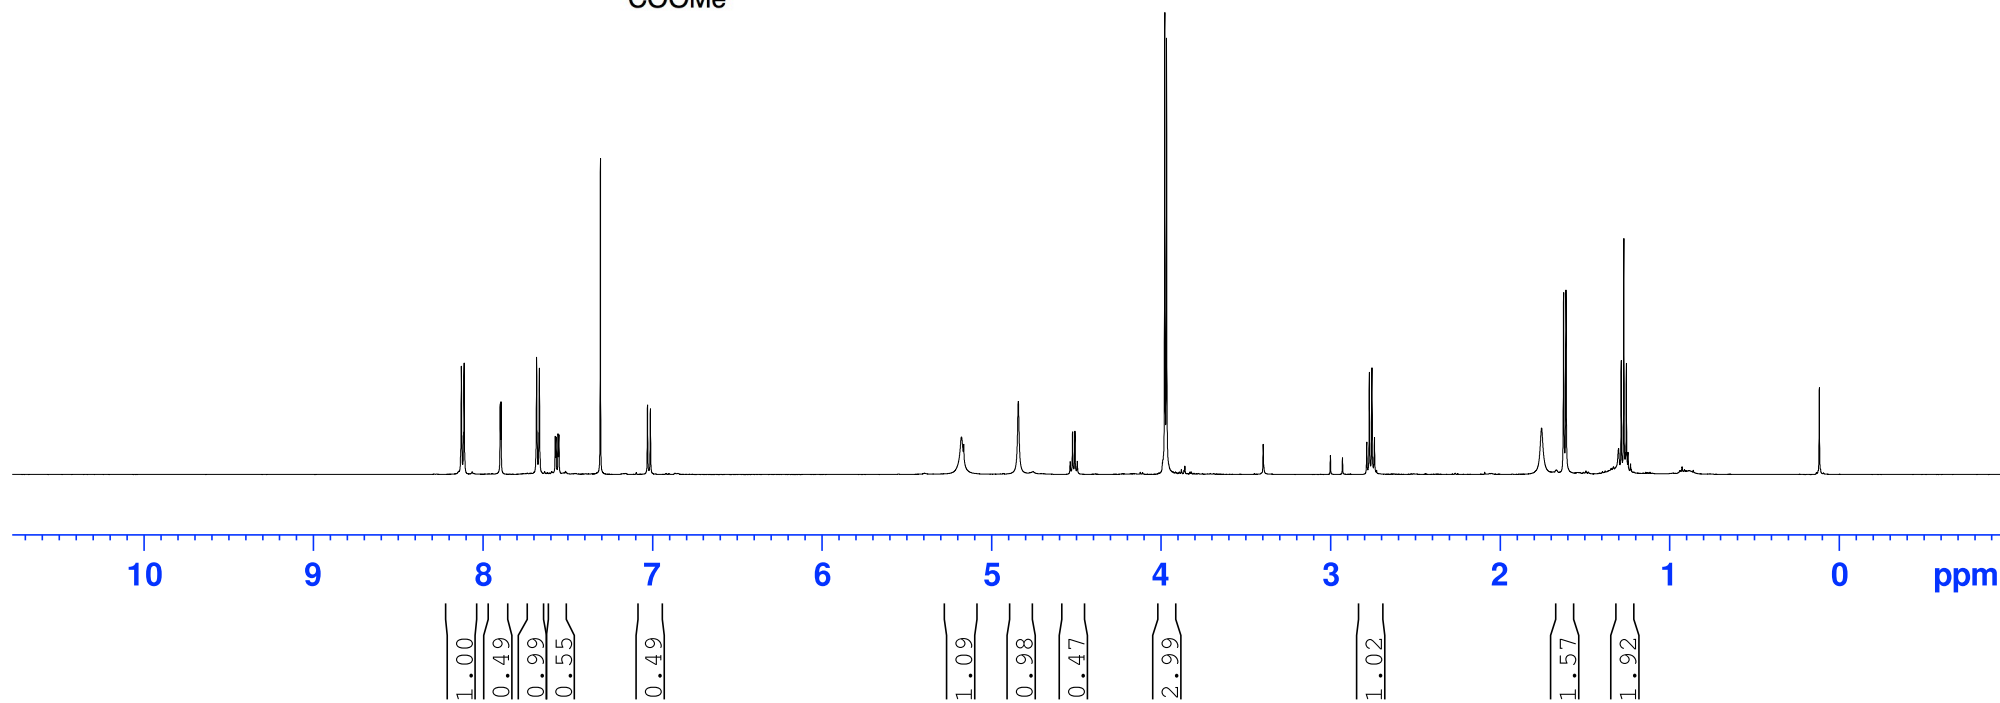

1D <sup>13</sup>C spectrum

Probe: 5 mm PABBO BB-1H/D Z-GRD Z113652/0192

- 173.336
- 167.054
- 164.364
- 160.672
- 156.445
- 145.250
- 132.549
- 132.146
- 130.150
- 128.387
- 126.723
- 126.678
- 126.494
- 110.999
- 101.856
- 90.820
- 74.841
- 55.643
- 52.091
- 29.699
- 27.132
- 22.963
- 12.544

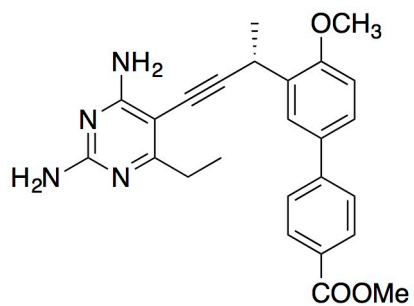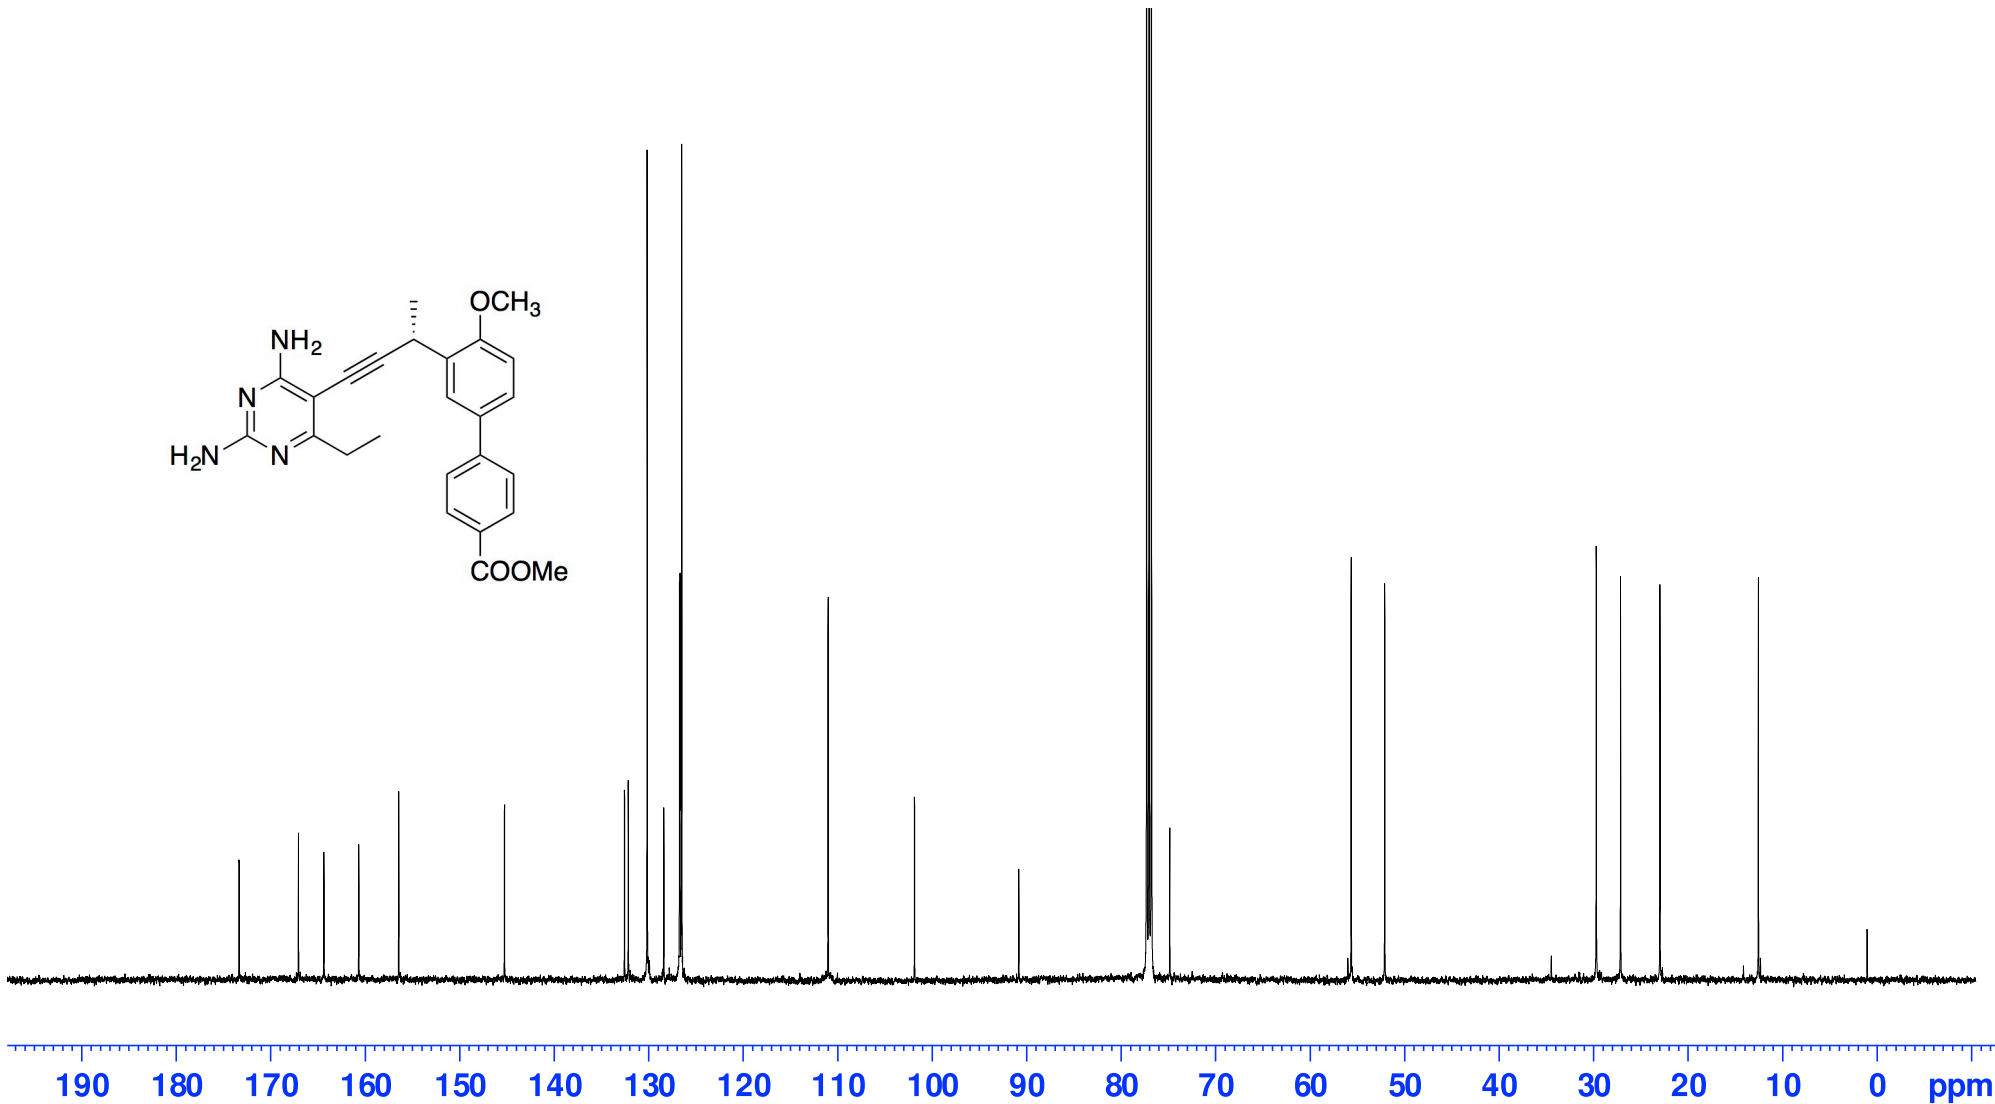

<sup>1</sup>H spectrum

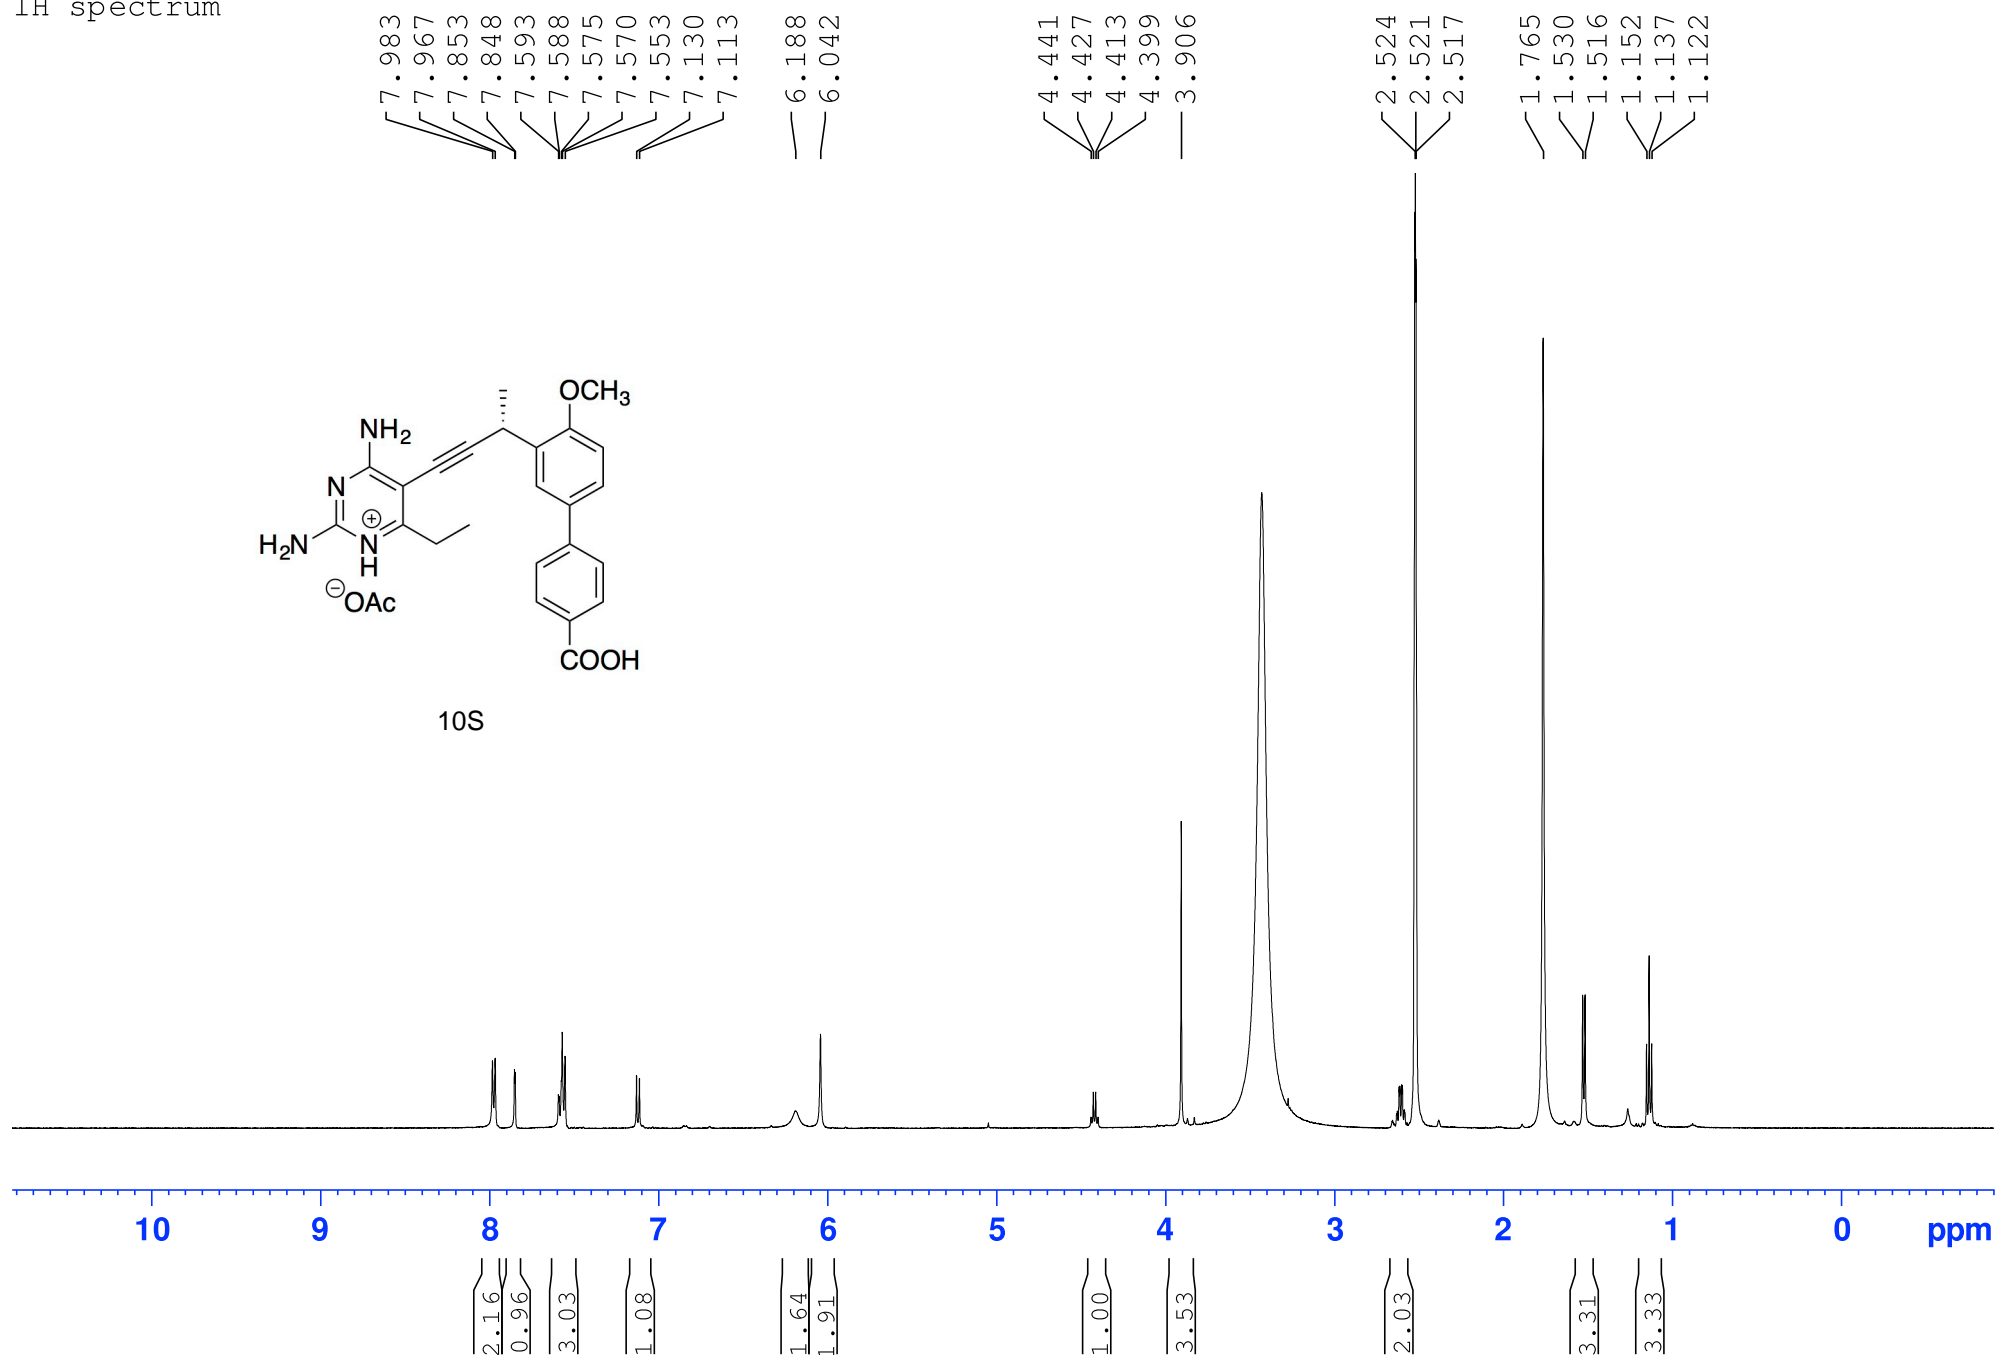

1D <sup>13</sup>C spectrum

Probe: 5 mm PABBO BB-1H/D Z-GRD Z113652/0192

— 176.631  
— 172.063  
— 164.805  
— 161.699  
— 156.091

— 141.273  
— 133.015  
— 132.254  
— 130.256  
— 126.604  
— 126.360  
— 125.492

— 112.120  
— 101.189

— 88.576

— 75.964

— 56.247

— 29.346  
— 27.150  
— 24.189  
— 23.399

— 12.768

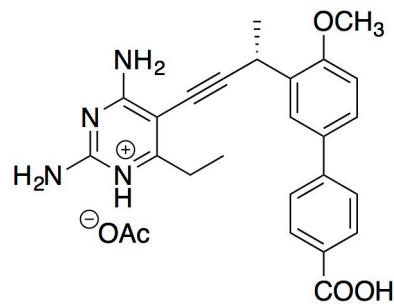

10S

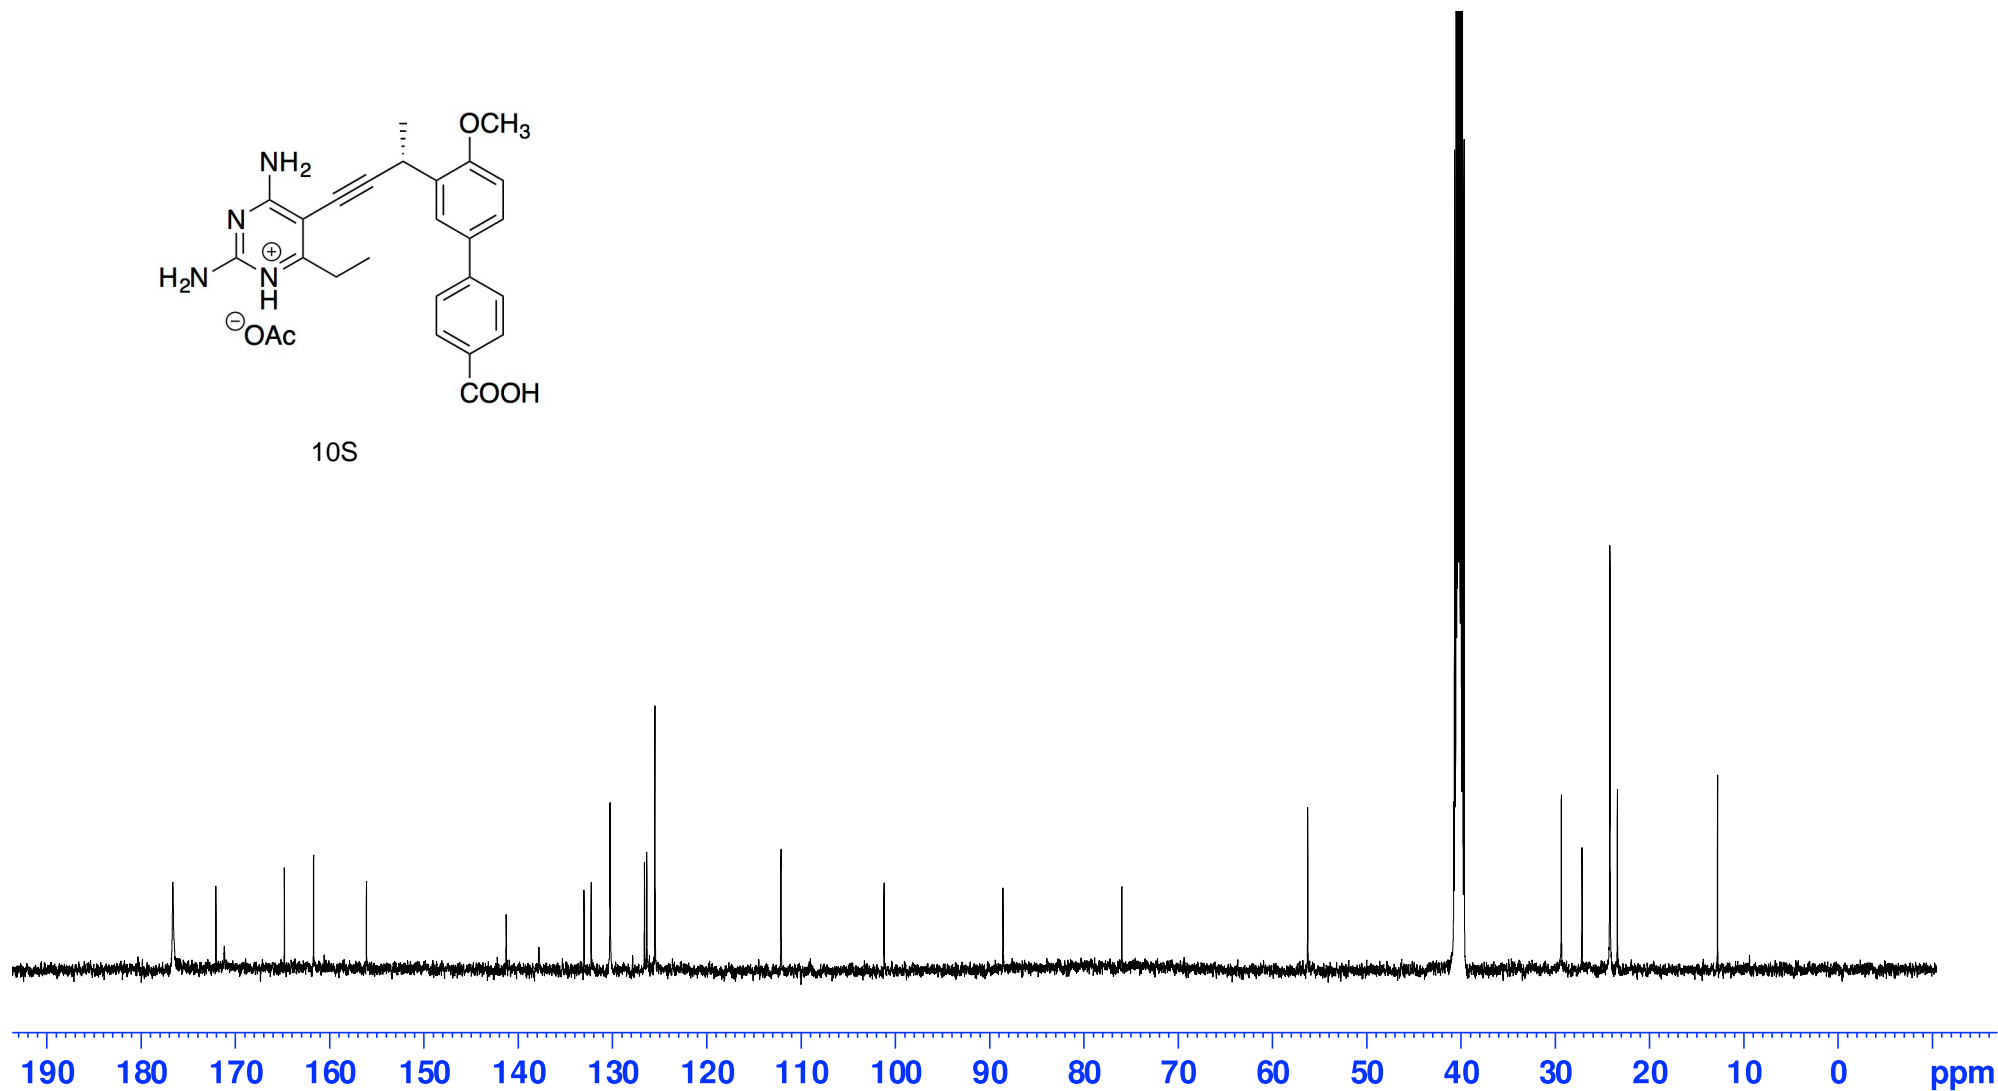

<sup>1</sup>H spectrum

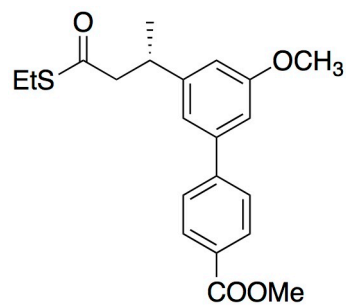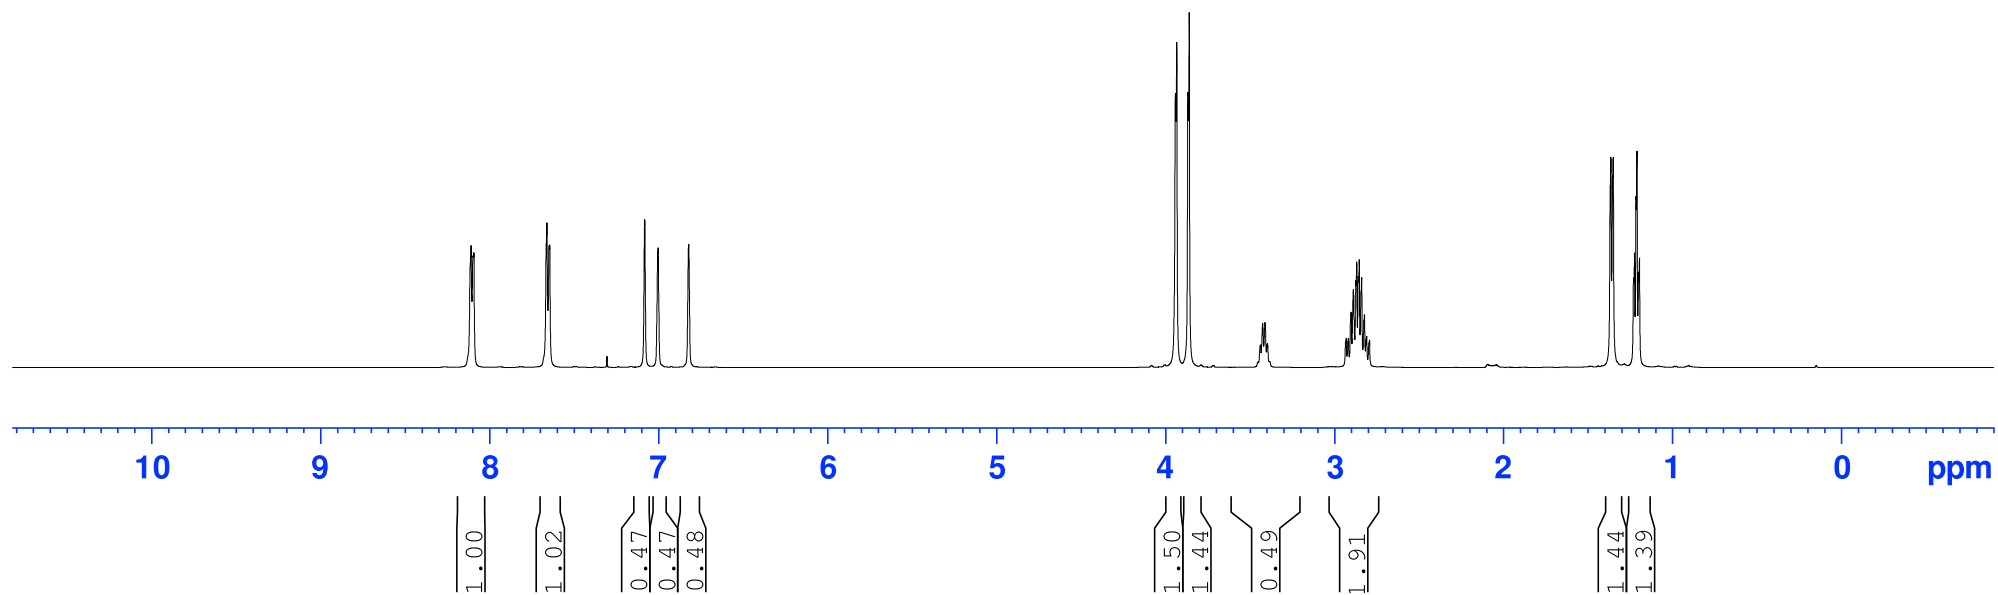



1D 13C spectrum

Probe: 5 mm PABBO BB-1H/D Z-GRD Z113652/0192

— 197.989  
— 166.860  
— 160.253  
— 147.705  
— 145.598  
— 141.537  
— 130.186  
— 130.041  
— 129.046  
— 127.189  
— 127.115  
— 118.436  
— 112.445  
— 110.891  
— 55.312  
— 52.047  
— 37.154  
— 23.359  
— 21.460  
— 14.760

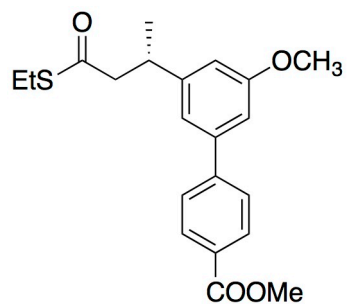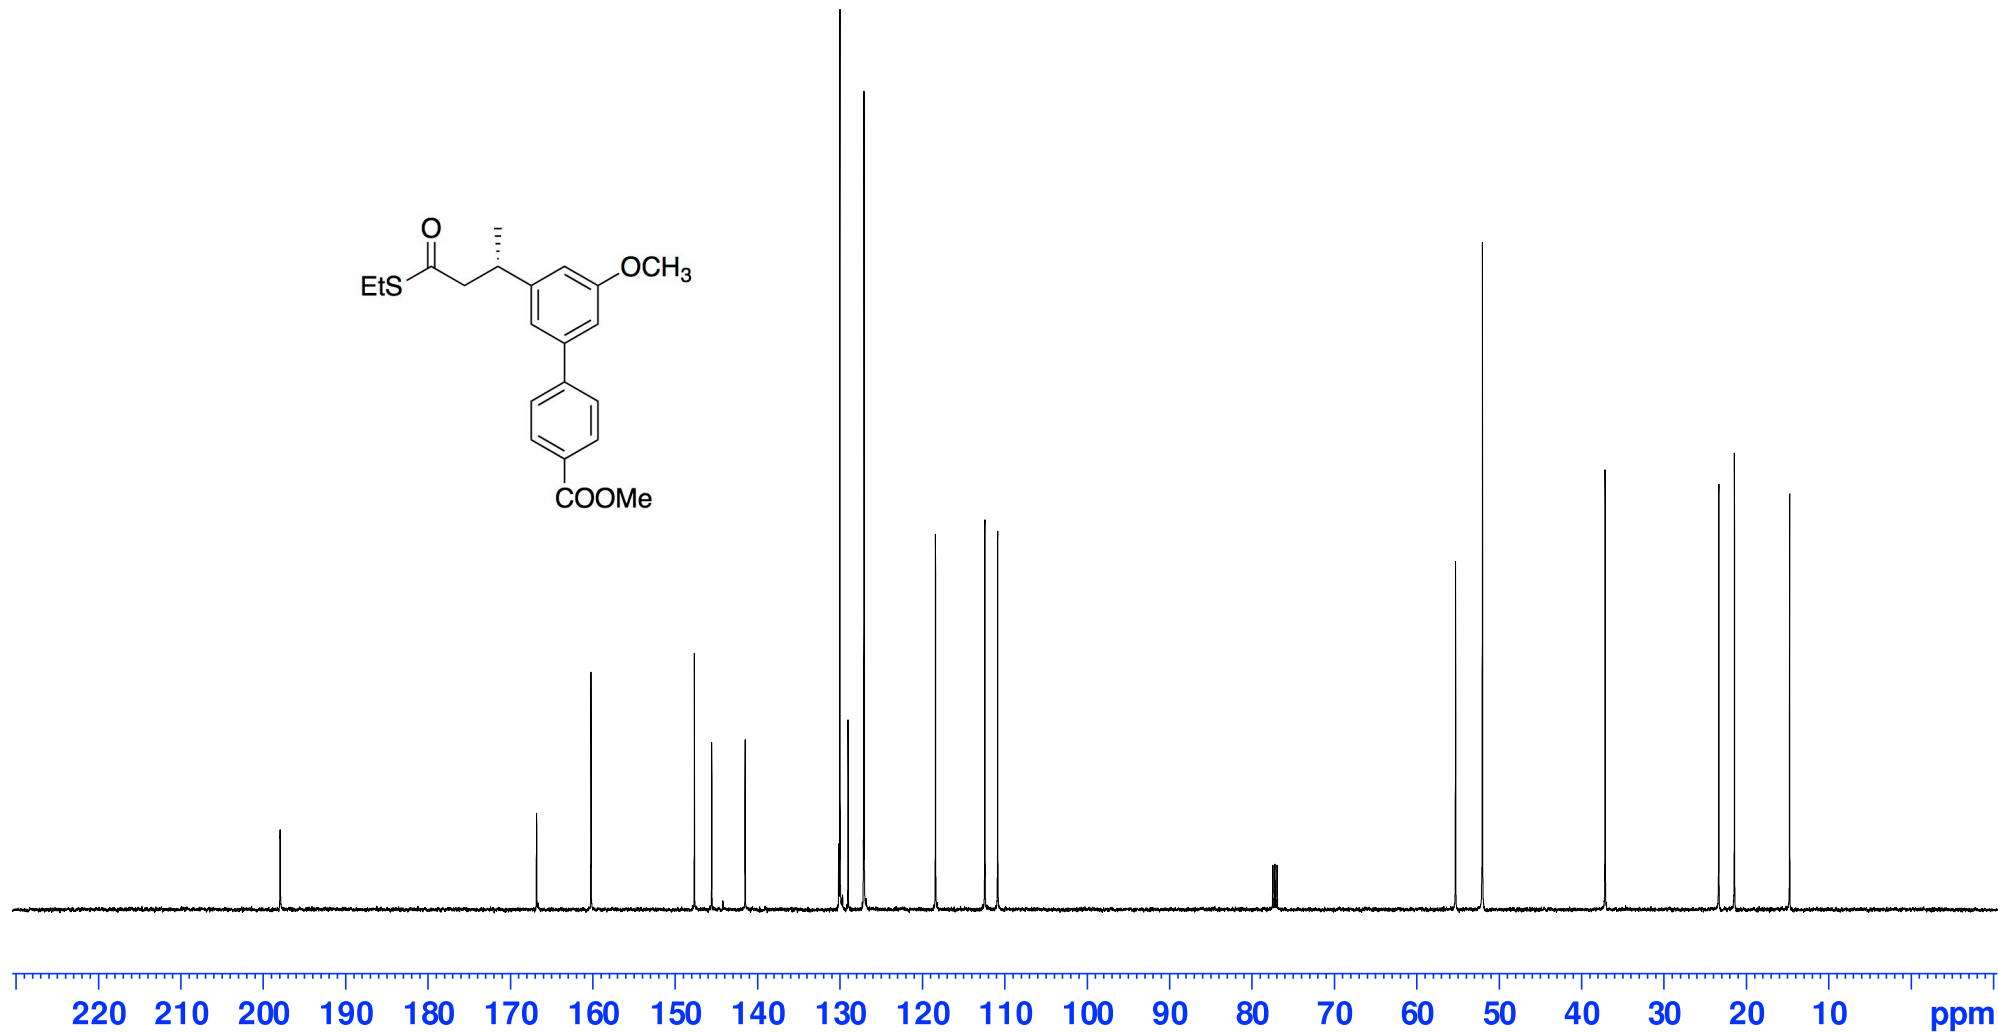

1H spectrum

9.763  
9.760  
9.756

8.129  
8.125  
8.116  
8.112  
8.109  
7.671  
7.667  
7.658  
7.654  
7.093  
7.090  
7.021  
7.018  
7.014  
6.842  
6.838  
6.834

3.956  
3.884  
3.460  
3.446  
3.432  
3.417  
2.853  
2.849  
2.839  
2.835  
2.819  
2.816  
2.805  
2.802  
2.749  
2.745  
2.734  
2.730  
2.715  
2.711  
2.700  
2.696  
1.390  
1.377

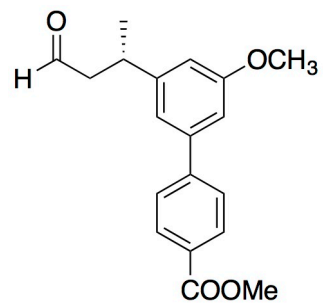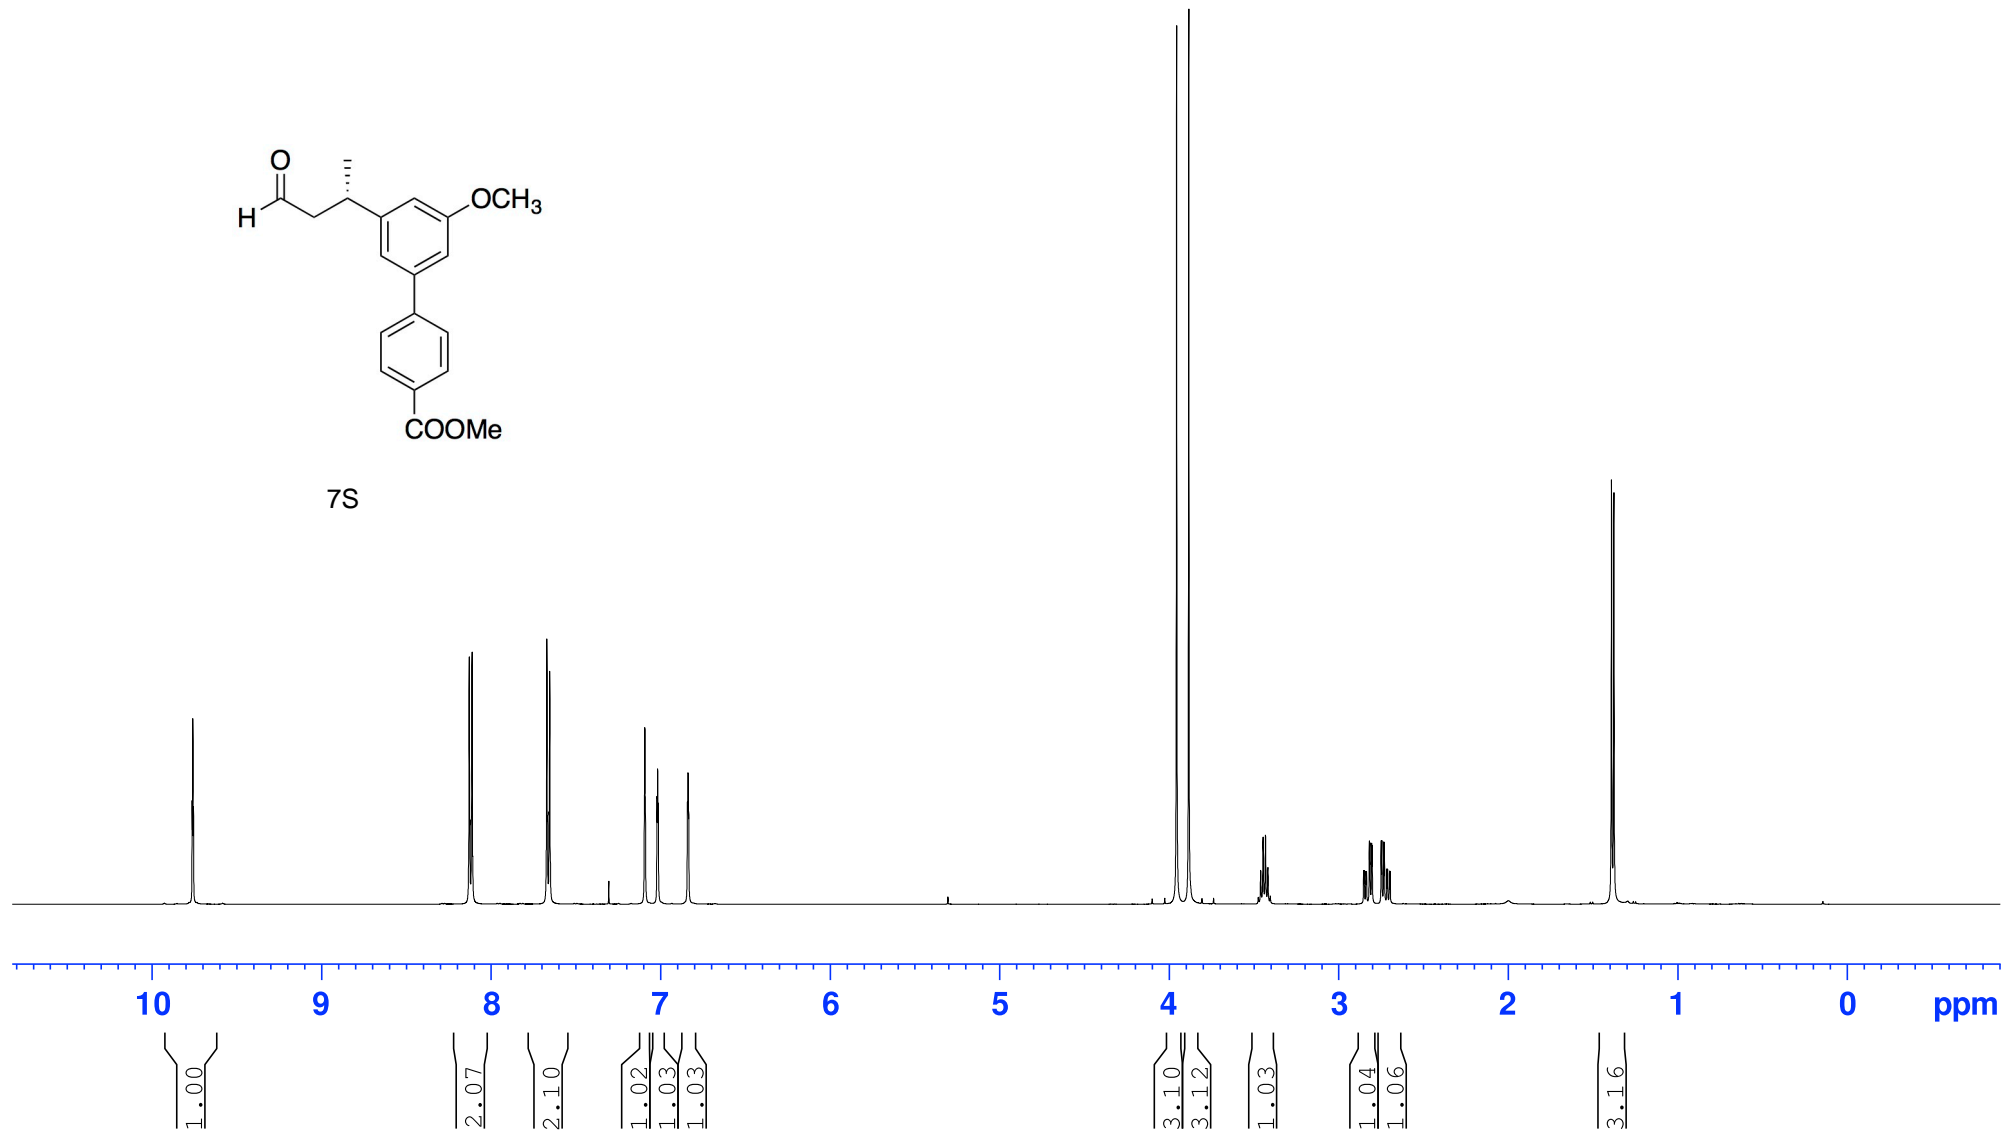

1D 13C spectrum

Probe: 5 mm PABBO BB-1H/D Z-GRD Z113652/0192

— 201.481  
— 166.910  
— 160.351  
— 147.887  
— 145.542  
— 141.795  
— 130.076  
— 129.119  
— 127.160  
— 118.406  
— 112.541  
— 110.816  
— 55.368  
— 52.124  
— 51.645  
— 34.431  
— 22.130

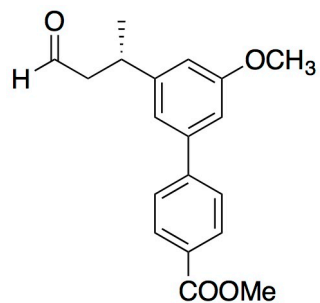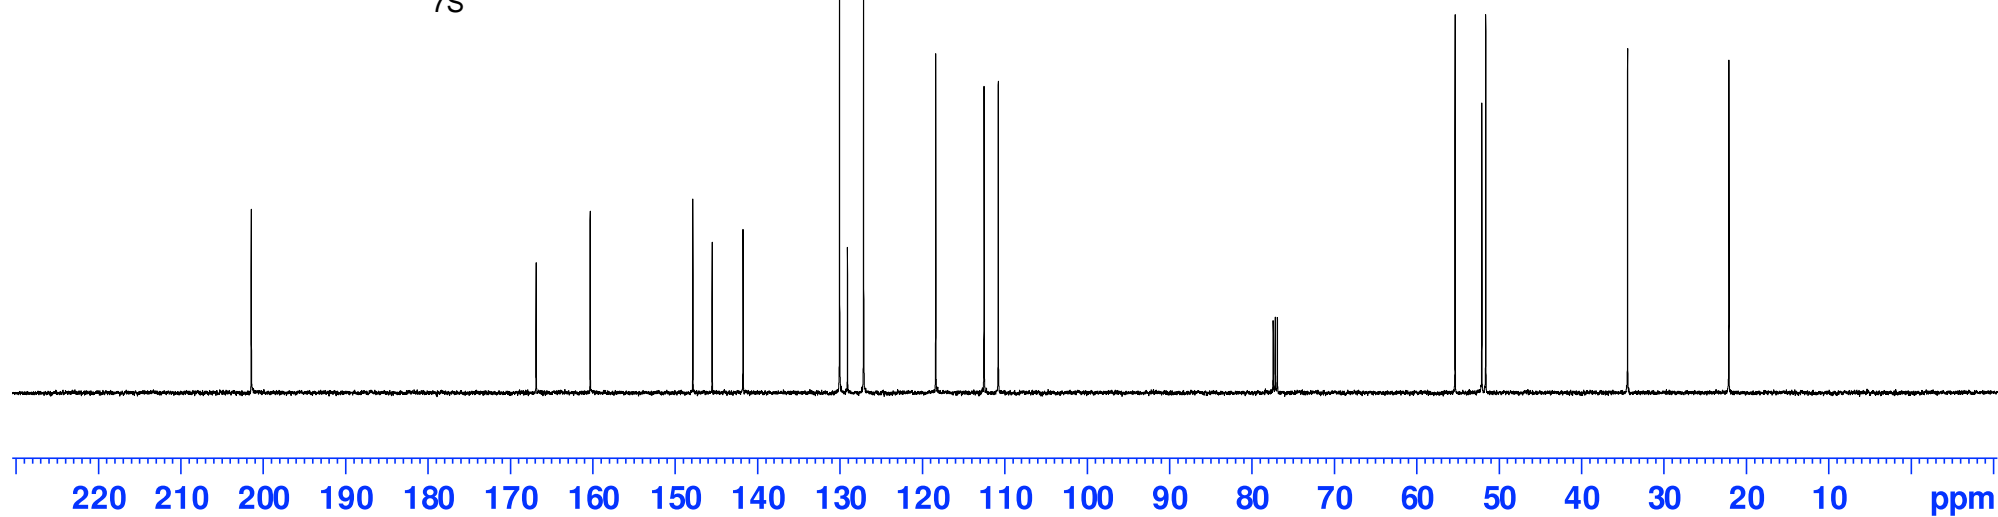

<sup>1</sup>H spectrum

8.155  
8.151  
8.142  
8.138  
8.135  
7.708  
7.705  
7.695  
7.691  
7.688  
7.277  
7.274  
7.073  
7.069  
7.065  
7.053  
7.050  
7.046

3.985  
3.922  
3.912  
3.887  
3.883  
3.873  
3.868  
3.859  
3.854  
3.845  
3.840

2.365  
2.360

1.797  
1.615  
1.601

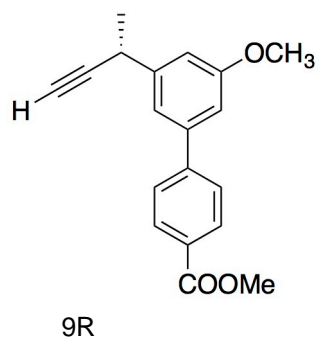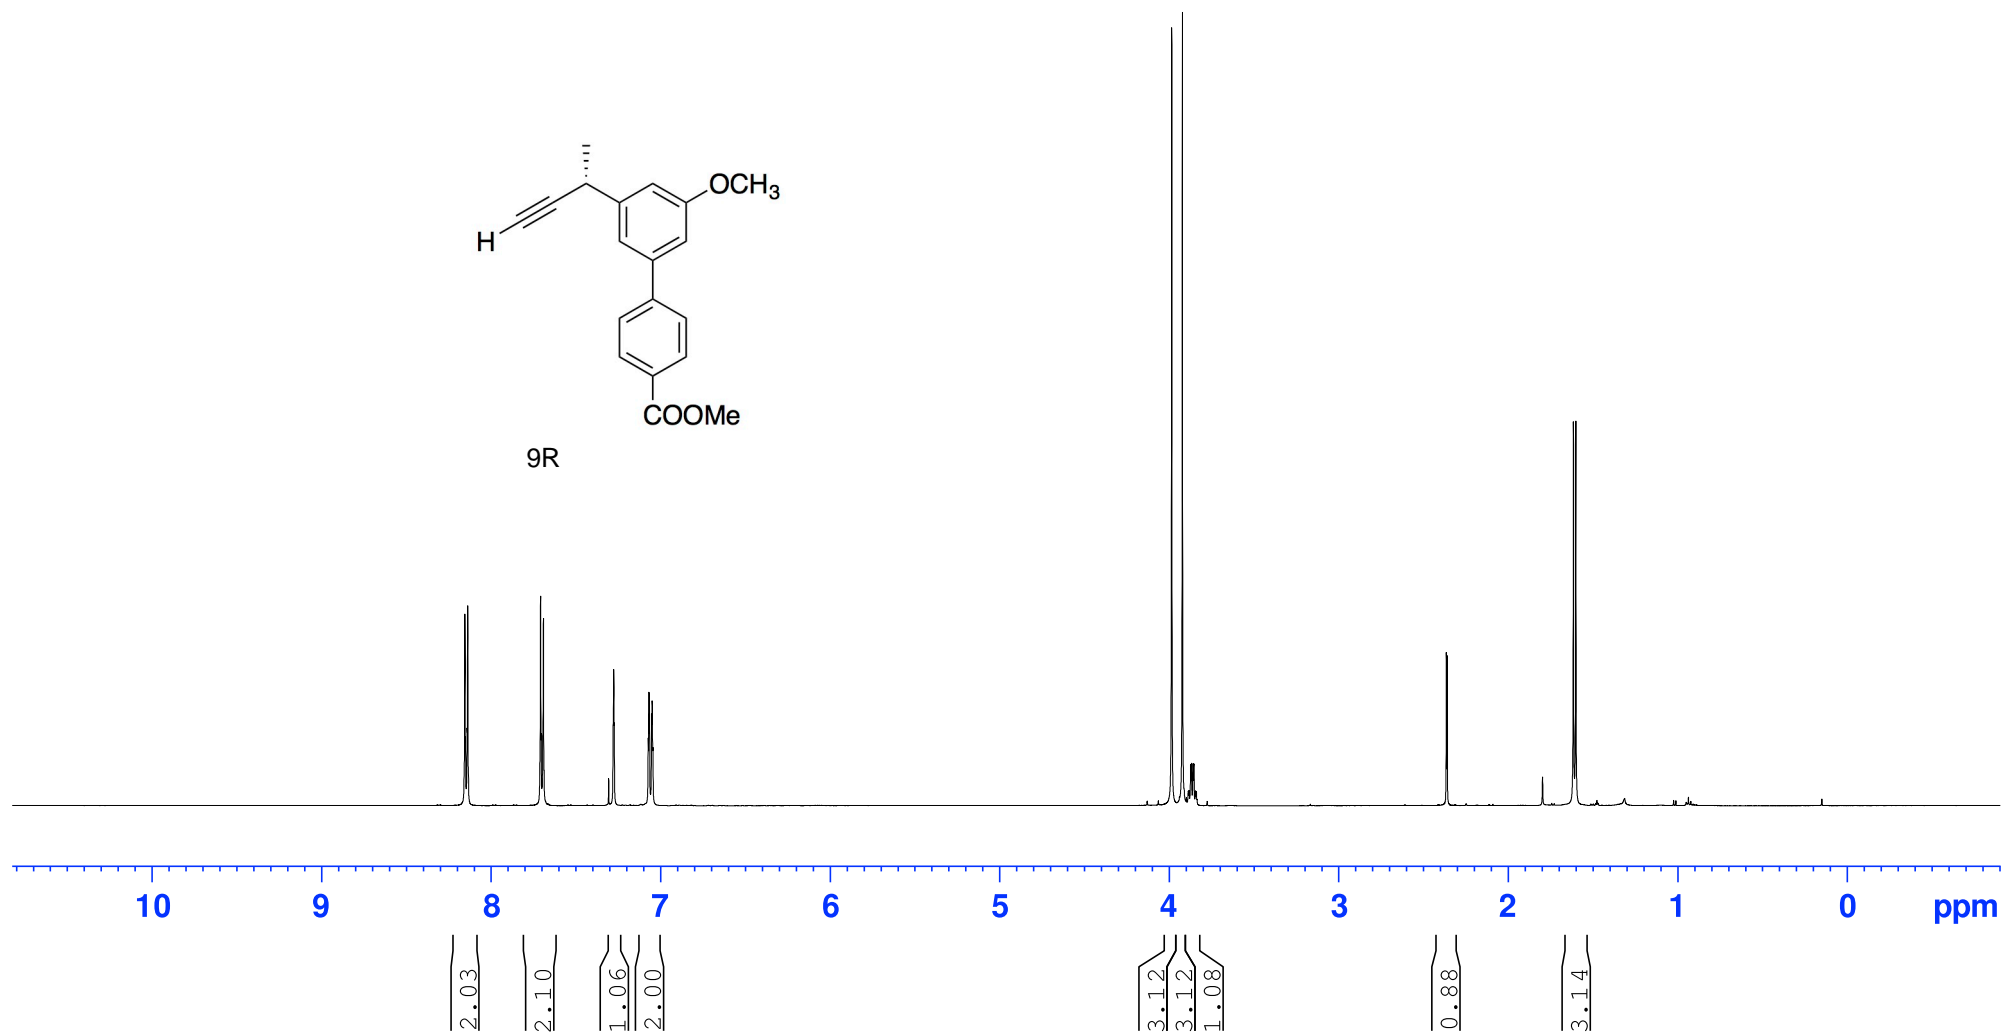

1D 13C spectrum

Probe: 5 mm PABBO BB-1H/D Z-GRD Z113652/0192

— 166.965  
— 160.307  
  145.514  
  144.938  
  141.735  
  130.089  
  129.126  
  127.195  
— 118.464  
  112.432  
  111.369  
  
— 86.758  
  
— 70.615  
  
  55.439  
  52.149  
  
— 31.823  
— 24.247

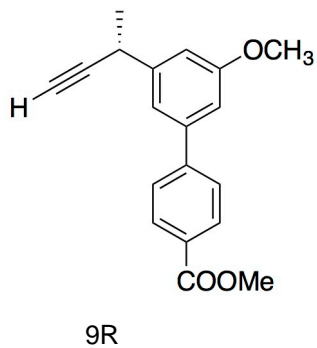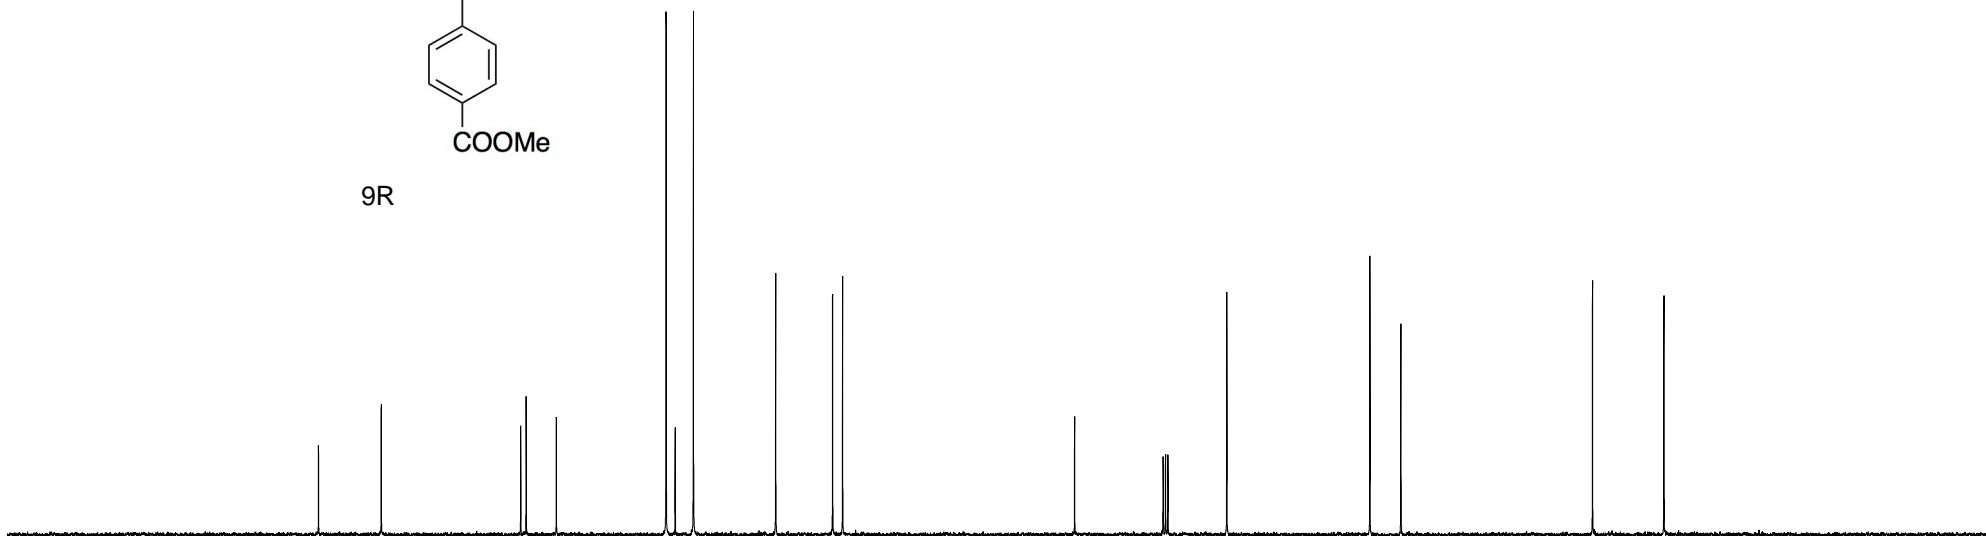

190 180 170 160 150 140 130 120 110 100 90 80 70 60 50 40 30 20 10 0 ppm

<sup>1</sup>H spectrum

8.047

8.032

7.684

7.668

7.366

7.112

7.053

6.242

6.156

4.183

4.169

4.155

4.141

3.853

2.601

2.586

2.571

2.556

1.578

1.564

1.146

1.131

1.115

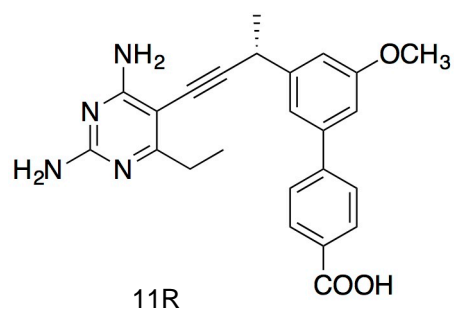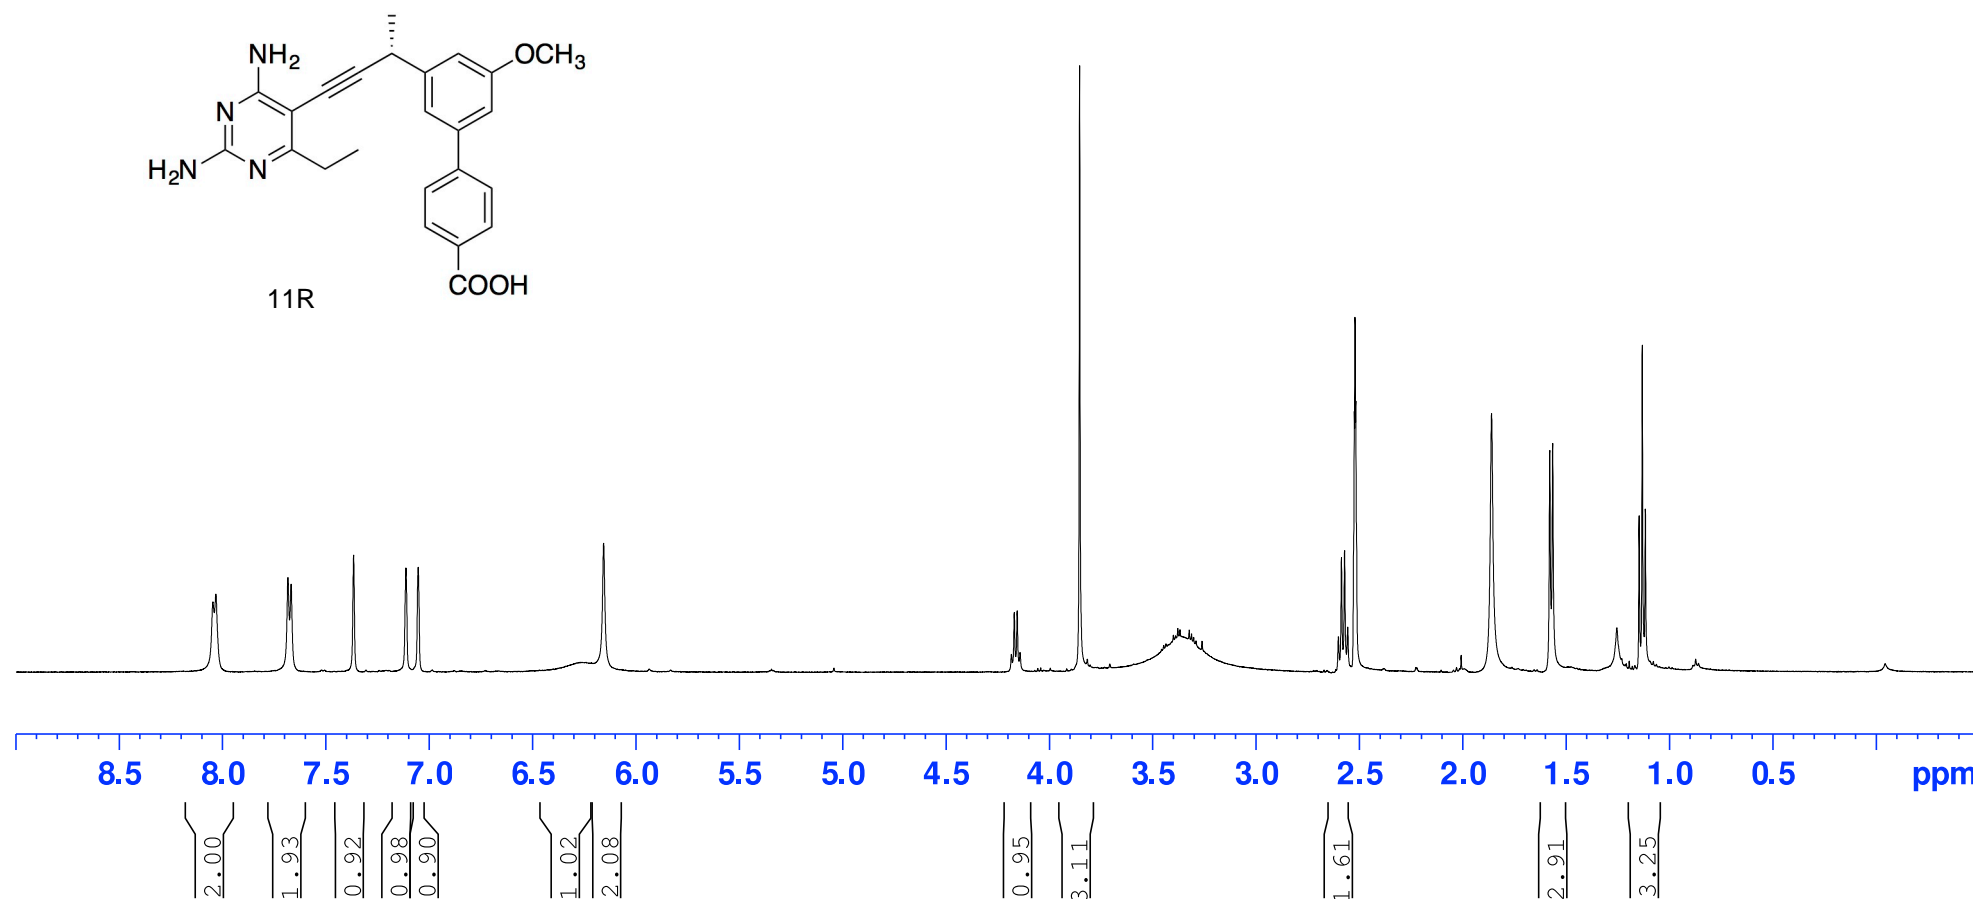

1D <sup>13</sup>C spectrum

Probe: 5 mm PABBO BB-1H/D Z-GRD Z113652/0192

— 172.140  
— 164.704  
— 161.701  
— 160.387  
  
— 146.382  
— 141.945  
  
— 130.265  
— 126.466  
  
— 118.253  
— 112.456  
— 110.860  
  
— 100.924  
  
— 88.266  
  
— 76.613  
  
— 55.694  
  
— 32.801  
— 29.378  
— 25.074  
  
— 12.907

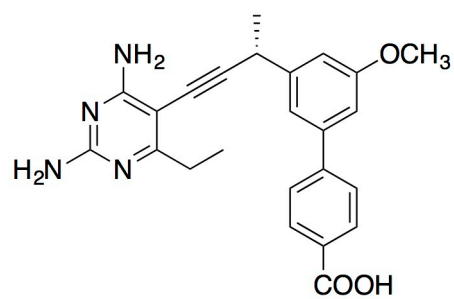

11R

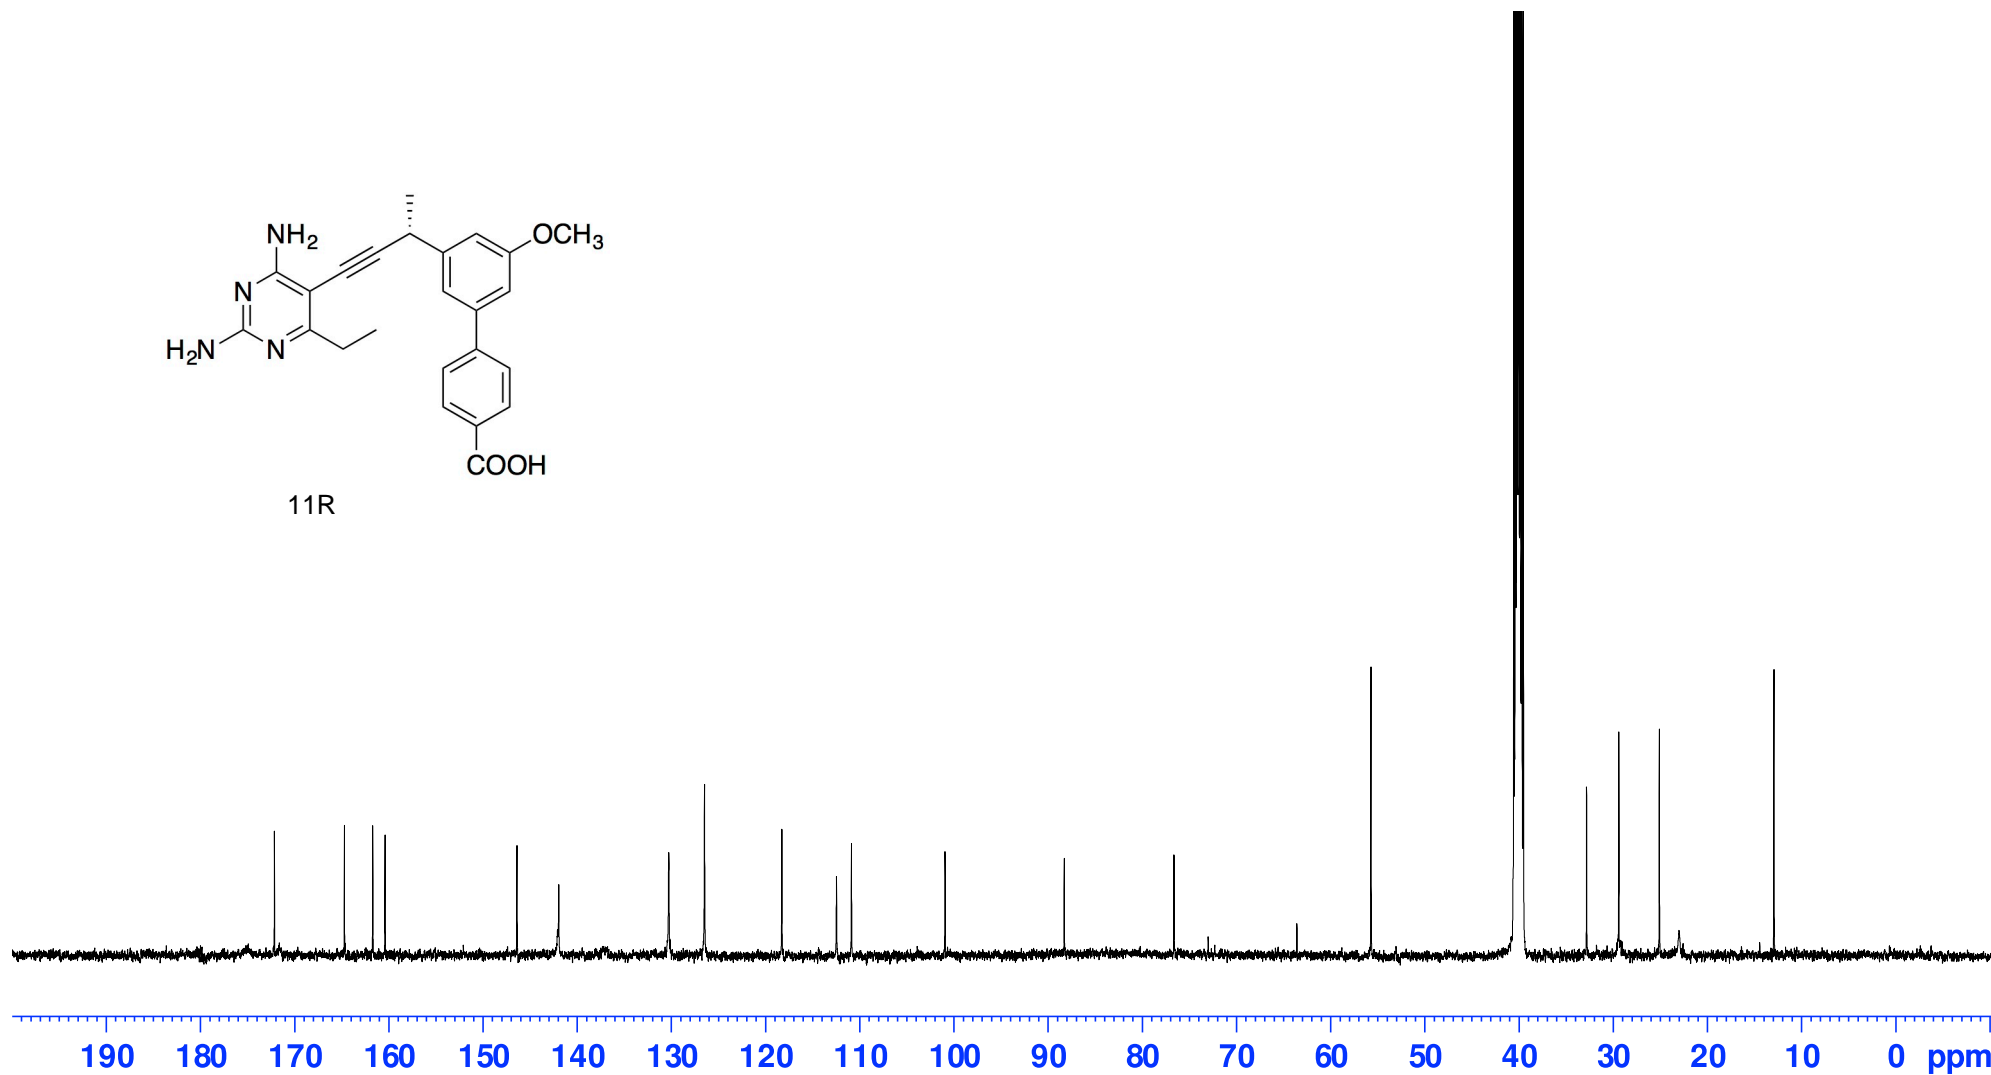

# ==== Shimadzu LCsolution Analysis Report ====

Acquired by : Admin  
 Sample Name : EWS-V-121 purity  
 Sample ID : EWS-V-121 purity  
 Tray# : 1  
 Vial # : 10  
 Injection Volume : 10 uL  
 Data File Name : EWS-V-121-purity check in ACN-001.lcd  
 Method File Name : 1106\_DTZ.lcm  
 Batch File Name :  
 Report File Name : Default.lcr  
 Data Acquired : 2/21/2016 8:07:07 AM  
 Data Processed : 2/26/2016 1:40:33 PM

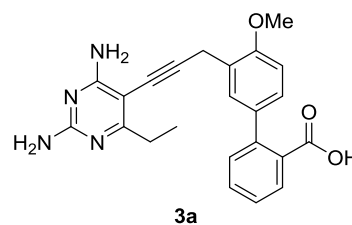

## <Chromatogram>

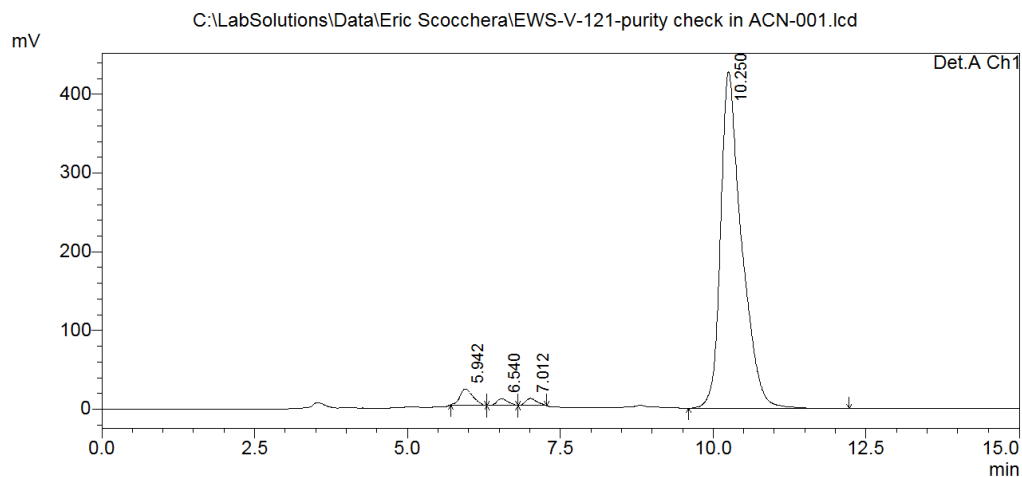

PeakTable

Detector A Ch1 254nm

| Peak#        | Ret. Time | Area            | Height        | Area %         | Height %       |
|--------------|-----------|-----------------|---------------|----------------|----------------|
| 1            | 5.942     | 304835          | 20664         | 2.827          | 4.442          |
| 2            | 6.540     | 109298          | 8562          | 1.014          | 1.841          |
| 3            | 7.012     | 114365          | 8850          | 1.061          | 1.903          |
| 4            | 10.250    | 10252632        | 427101        | 95.098         | 91.815         |
| <b>Total</b> |           | <b>10781130</b> | <b>465177</b> | <b>100.000</b> | <b>100.000</b> |



# ==== Shimadzu LCsolution Analysis Report ====

C:\LabSolutions\Data\Eric Scocchera\EWS-V-121-purity check in MeOH-001.lcd  
 Acquired by : Admin  
 Sample Name : EWS-V-121 purity in MeOH  
 Sample ID : EWS-V-121 purity in MeOH  
 Tray# : 1  
 Vial # : 10  
 Injection Volume : 10 uL  
 Data File Name : EWS-V-121-purity check in MeOH-001.lcd  
 Method File Name : 1106\_DTZ.lcm  
 Batch File Name :  
 Report File Name : Default.lcr  
 Data Acquired : 2/21/2016 3:12:53 PM  
 Data Processed : 2/21/2016 4:14:43 PM

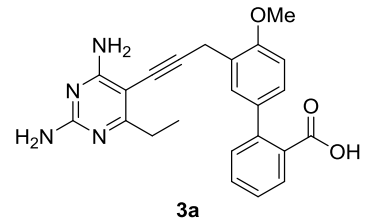

## <Chromatogram>

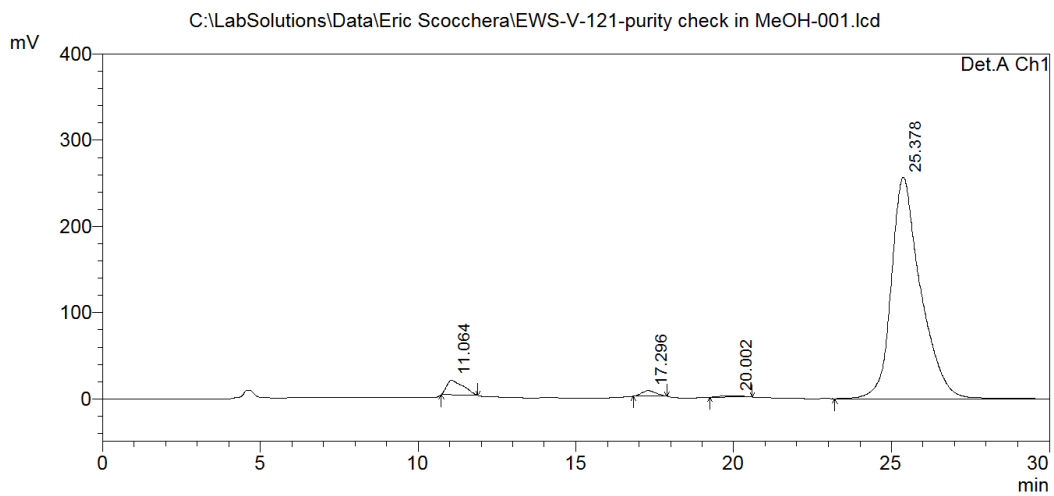

PeakTable

Detector A Ch1 254nm

| Peak# | Ret. Time | Area     | Height | Area %  | Height % |
|-------|-----------|----------|--------|---------|----------|
| 1     | 11.064    | 622304   | 17018  | 3.559   | 6.044    |
| 2     | 17.296    | 203796   | 6203   | 1.166   | 2.203    |
| 3     | 20.002    | 64018    | 1317   | 0.366   | 0.468    |
| 4     | 25.378    | 16593874 | 257055 | 94.909  | 91.286   |
| Total |           | 17483992 | 281594 | 100.000 | 100.000  |

# ==== Shimadzu LCsolution Analysis Report ====

C:\LabSolutions\Data\Eric Scochera\EWS-V-124-002.lcd  
 Acquired by : Admin  
 Sample Name : EWS-V-124  
 Sample ID : EWS-V-124  
 Tray# : 1  
 Vial # : 10  
 Injection Volume : 30 uL  
 Data File Name : EWS-V-124-002.lcd  
 Method File Name : Test1.lcm  
 Batch File Name :  
 Report File Name : Default.lcr  
 Data Acquired : 2/24/2016 2:36:36 PM  
 Data Processed : 2/24/2016 3:03:36 PM

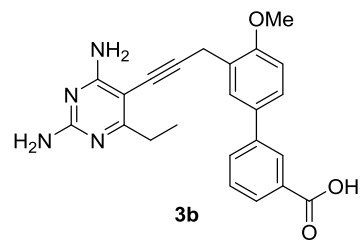

## <Chromatogram>

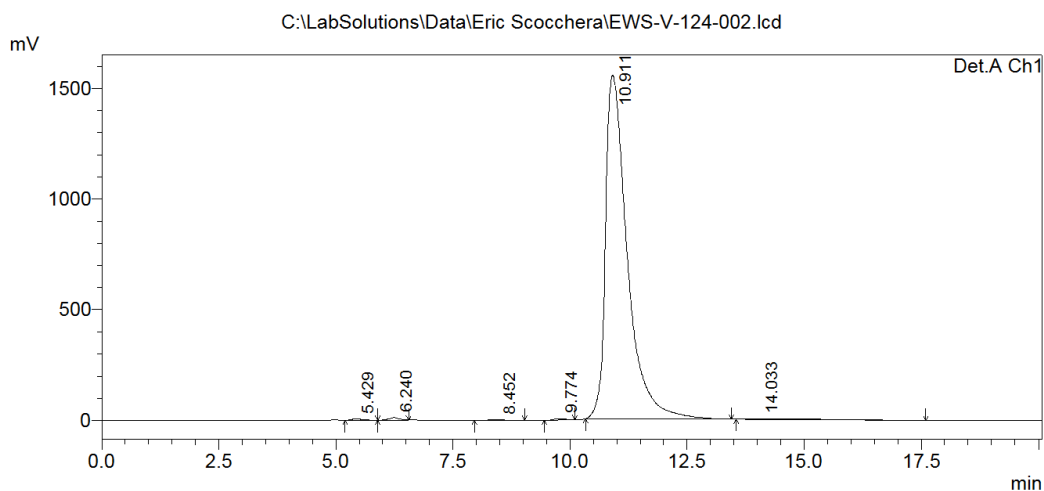

PeakTable

Detector A Ch1 254nm

| Peak# | Ret. Time | Area     | Height  | Area %  | Height % |
|-------|-----------|----------|---------|---------|----------|
| 1     | 5.429     | 117820   | 6384    | 0.230   | 0.403    |
| 2     | 6.240     | 205350   | 11598   | 0.402   | 0.732    |
| 3     | 8.452     | 70045    | 2878    | 0.137   | 0.181    |
| 4     | 9.774     | 93959    | 6185    | 0.184   | 0.390    |
| 5     | 10.911    | 50465823 | 1555769 | 98.705  | 98.128   |
| 6     | 14.033    | 175142   | 2640    | 0.343   | 0.166    |
| Total |           | 51128139 | 1585454 | 100.000 | 100.000  |

# ==== Shimadzu LCsolution Analysis Report ====

C:\LabSolutions\Data\Eric Scocchera\EWS-V-124-in MeOH-003.lcd  
 Acquired by : Admin  
 Sample Name : EWS-V-124-in MeOH  
 Sample ID : EWS-V-124-in MeOH  
 Tray# : 1  
 Vial # : 10  
 Injection Volume : 30 uL  
 Data File Name : EWS-V-124-in MeOH-003.lcd  
 Method File Name : Test1.lcm  
 Batch File Name :  
 Report File Name : Default.lcr  
 Data Acquired : 2/24/2016 4:43:29 PM  
 Data Processed : 2/24/2016 6:32:00 PM

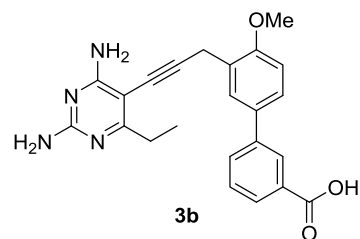

## <Chromatogram>

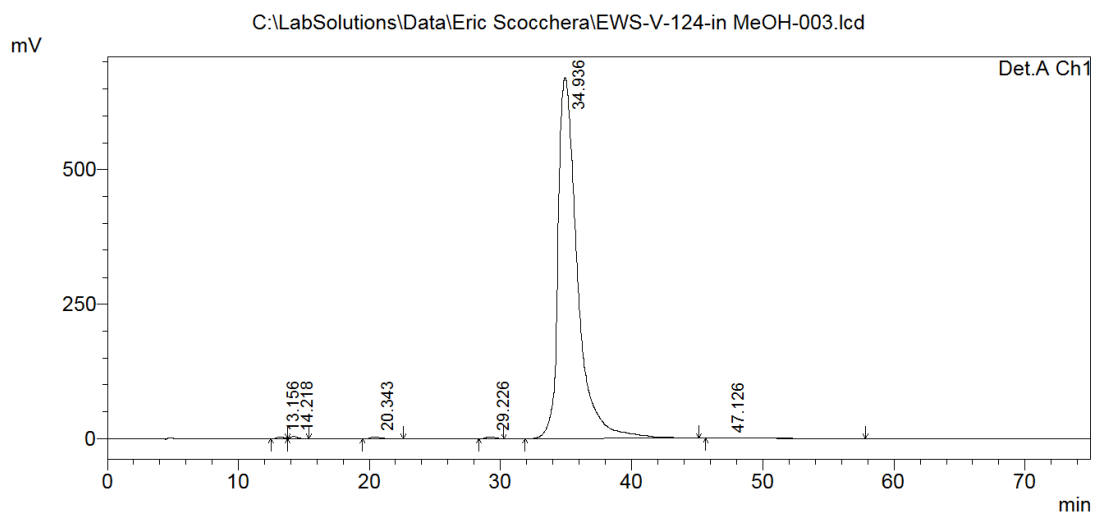

PeakTable

Detector A Ch1 254nm

| Peak#        | Ret. Time | Area            | Height        | Area %         | Height %       |
|--------------|-----------|-----------------|---------------|----------------|----------------|
| 1            | 13.156    | 104356          | 3261          | 0.150          | 0.476          |
| 2            | 14.218    | 138297          | 4215          | 0.199          | 0.615          |
| 3            | 20.343    | 180182          | 3021          | 0.259          | 0.441          |
| 4            | 29.226    | 166584          | 3216          | 0.240          | 0.469          |
| 5            | 34.936    | 68733445        | 671150        | 98.958         | 97.930         |
| 6            | 47.126    | 134293          | 472           | 0.193          | 0.069          |
| <b>Total</b> |           | <b>69457157</b> | <b>685336</b> | <b>100.000</b> | <b>100.000</b> |

# ==== Shimadzu LCsolution Analysis Report ====

C:\LabSolutions\Data\Eric Scocchera\EWS-V-170-005.lcd  
 Acquired by : Admin  
 Sample Name : EWS-V-170-good  
 Sample ID : EWS-V-170  
 Tray# : 1  
 Vial # : 69  
 Injection Volume : 40 uL  
 Data File Name : EWS-V-170-005.lcd  
 Method File Name : Test.lcm  
 Batch File Name :  
 Report File Name : Default.lcr  
 Data Acquired : 12/11/2015 12:46:34 PM  
 Data Processed : 12/11/2015 1:08:30 PM

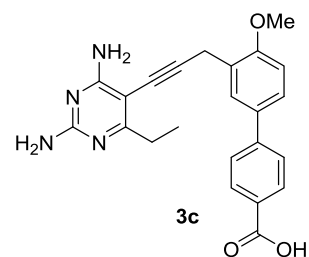

## <Chromatogram>

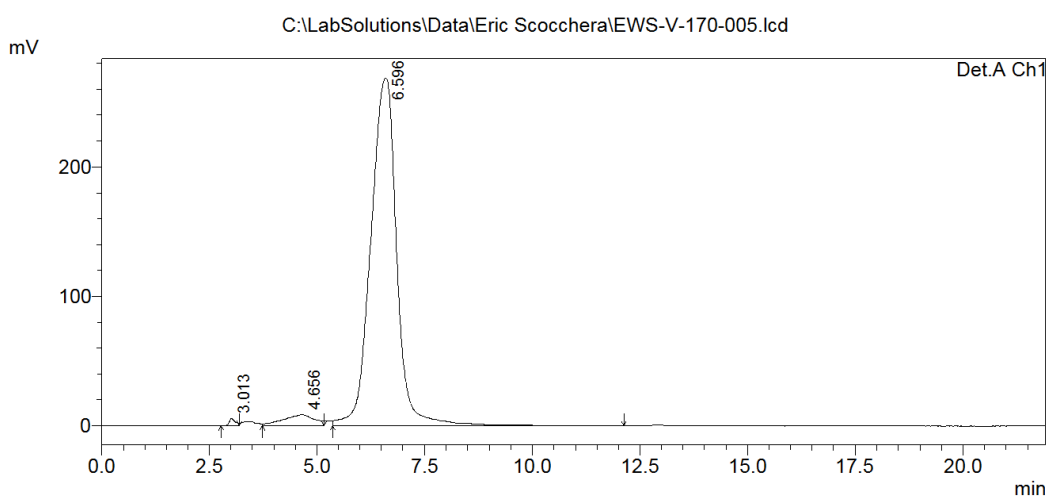

PeakTable

Detector A Ch1 254nm

| Peak# | Ret. Time | Area     | Height | Area %  | Height % |
|-------|-----------|----------|--------|---------|----------|
| 1     | 3.013     | 57844    | 5655   | 0.493   | 2.001    |
| 2     | 4.656     | 438677   | 8450   | 3.739   | 2.990    |
| 3     | 6.596     | 11236471 | 268471 | 95.768  | 95.008   |
| Total |           | 11732992 | 282577 | 100.000 | 100.000  |

# ==== Shimadzu LCsolution Analysis Report ====

C:\LabSolutions\Data\Eric Scocchera\EWS-1106 purity in MeOH-001.lcd  
 Acquired by : Admin  
 Sample Name : EWS-1106 purity check methanol  
 Sample ID : ucp-1106 Methanol  
 Tray# : 1  
 Vial # : 69  
 Injection Volume : 25 uL  
 Data File Name : EWS-1106 purity in MeOH-001.lcd  
 Method File Name : Test.lcm  
 Batch File Name :  
 Report File Name : Default.lcr  
 Data Acquired : 12/18/2015 5:38:44 PM  
 Data Processed : 12/18/2015 6:13:50 PM

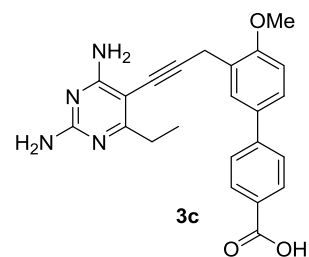

## <Chromatogram>

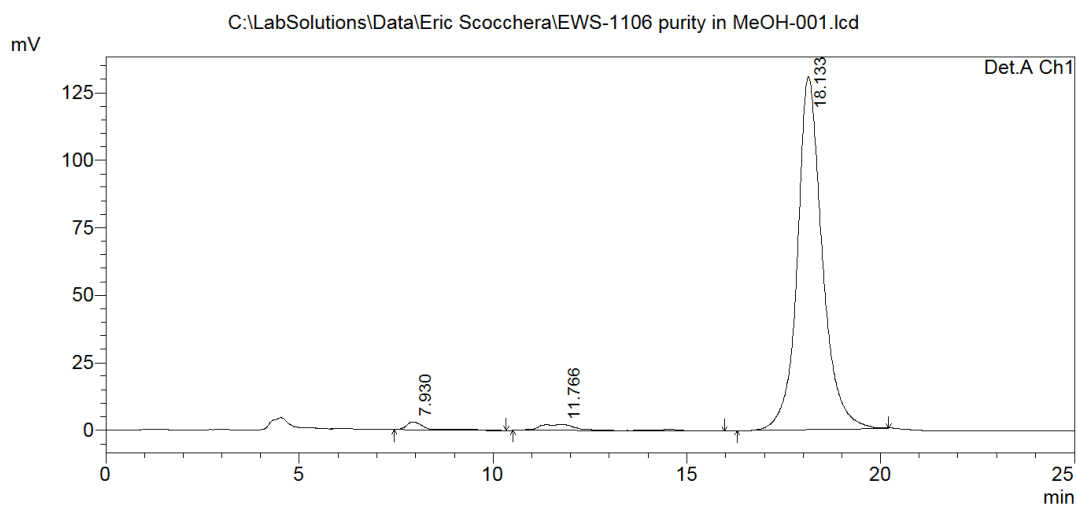

PeakTable

Detector A Ch1 254nm

| Peak# | Ret. Time | Area    | Height | Area %  | Height % |
|-------|-----------|---------|--------|---------|----------|
| 1     | 7.930     | 86543   | 2909   | 1.413   | 2.139    |
| 2     | 11.766    | 169834  | 2270   | 2.773   | 1.670    |
| 3     | 18.133    | 5867404 | 130799 | 95.813  | 96.191   |
| Total |           | 6123782 | 135979 | 100.000 | 100.000  |

# ==== Shimadzu LCsolution Analysis Report ====

C:\LabSolutions\Data\Eric Scocchera\EWS-V-170-004.lcd  
 Acquired by : Admin  
 Sample Name : EWS-V-170  
 Sample ID : EWS-V-170  
 Tray# : 1  
 Vial # : 57  
 Injection Volume : 30 uL  
 Data File Name : EWS-V-170-004.lcd  
 Method File Name : Test.lcm  
 Batch File Name :  
 Report File Name : Default.lcr  
 Data Acquired : 12/9/2015 2:19:34 PM  
 Data Processed : 12/9/2015 3:01:40 PM

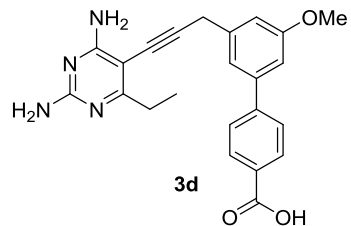

## <Chromatogram>

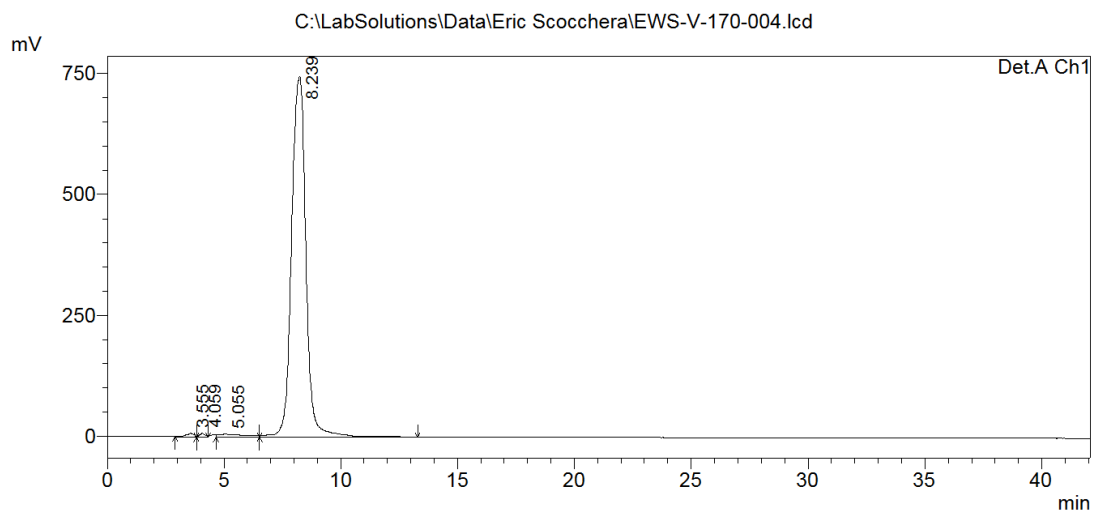

PeakTable

Detector A Ch1 254nm

| Peak# | Ret. Time | Area     | Height | Area %  | Height % |
|-------|-----------|----------|--------|---------|----------|
| 1     | 3.555     | 170534   | 6981   | 0.525   | 0.911    |
| 2     | 4.059     | 123746   | 7893   | 0.381   | 1.030    |
| 3     | 5.055     | 469975   | 6027   | 1.448   | 0.786    |
| 4     | 8.239     | 31702936 | 745370 | 97.646  | 97.272   |
| Total |           | 32467191 | 766270 | 100.000 | 100.000  |

## ==== Shimadzu LCsolution Analysis Report ====

C:\LabSolutions\Data\Eric Scocchera\EWS-1175 purity in MeOH-004.lcd  
 Acquired by : Admin  
 Sample Name : EWS-1175 purity check  
 Sample ID : ucp-1175  
 Tray# : 1  
 Vial # : 70  
 Injection Volume : 25 uL  
 Data File Name : EWS-1175 purity in MeOH-004.lcd  
 Method File Name : Test.lcm  
 Batch File Name :  
 Report File Name : Default.lcr  
 Data Acquired : 12/18/2015 5:04:09 PM  
 Data Processed : 2/26/2016 2:08:58 PM

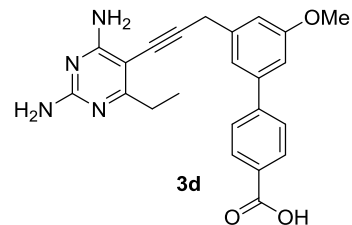

### <Chromatogram>

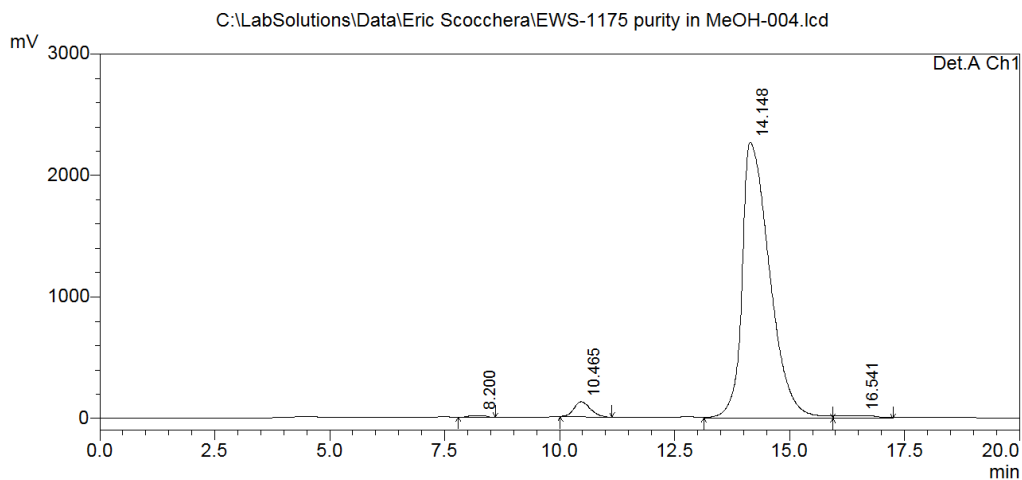

PeakTable

Detector A Ch1 254nm

| Peak# | Ret. Time | Area     | Height  | Area %  | Height % |
|-------|-----------|----------|---------|---------|----------|
| 1     | 8.200     | 385597   | 16155   | 0.388   | 0.664    |
| 2     | 10.465    | 3089120  | 124922  | 3.107   | 5.136    |
| 3     | 14.148    | 94823379 | 2270390 | 95.371  | 93.344   |
| 4     | 16.541    | 1128084  | 20804   | 1.135   | 0.855    |
| Total |           | 99426180 | 2432271 | 100.000 | 100.000  |

# ==== Shimadzu LCsolution Analysis Report ====

C:\LabSolutions\Data\Santosh\zwitterions final\skk-nb4-134-004.lcd  
 Acquired by : Admin  
 Sample Name : skk-nb4-134  
 Sample ID : skk-nb4-134  
 Tray# : 1  
 Vail # : 41  
 Injection Volume : 40 uL  
 Data File Name : skk-nb4-134-004.lcd  
 Method File Name : Test.lcm  
 Batch File Name :  
 Report File Name : Default.lcr  
 Data Acquired : 12/9/2015 5:15:09 PM  
 Data Processed : 12/9/2015 6:02:03 PM

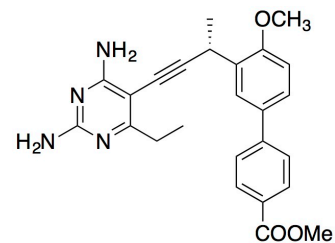

## <Chromatogram>

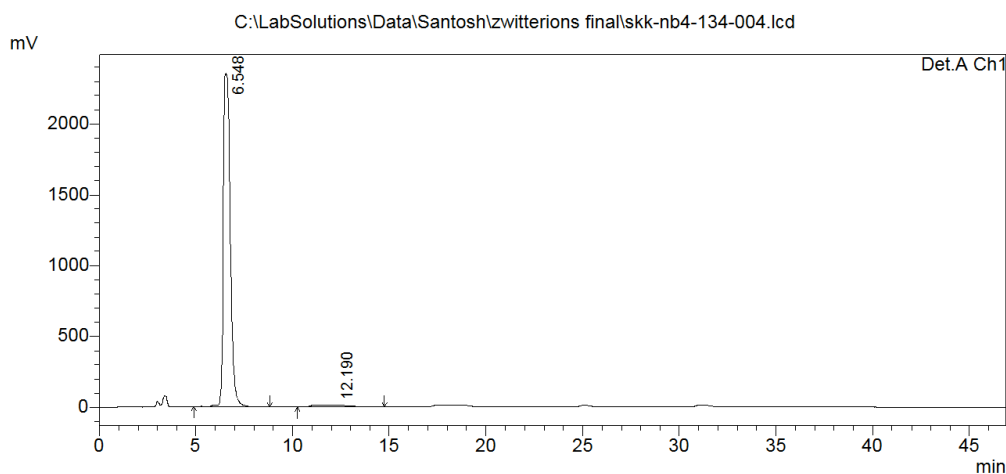

PeakTable

Detector A Ch1 254nm

| Peak# | Ret. Time | Area     | Height  | Area %  | Height % |
|-------|-----------|----------|---------|---------|----------|
| 1     | 6.548     | 59135238 | 2352052 | 97.269  | 99.349   |
| 2     | 12.190    | 1660436  | 15401   | 2.731   | 0.651    |
| Total |           | 60795674 | 2367453 | 100.000 | 100.000  |



# ==== Shimadzu LCsolution Analysis Report ====

C:\LabSolutions\Data\Santosh\zwitterions final\ucp-1179-010.lcd  
 Acquired by : Admin  
 Sample Name : ucp-1179  
 Sample ID : ucp-1179  
 Tray# : 1  
 Vial # : 44  
 Injection Volume : 10 uL  
 Data File Name : ucp-1179-010.lcd  
 Method File Name : Test.lcm  
 Batch File Name :  
 Report File Name : Default.lcr  
 Data Acquired : 12/16/2015 3:58:45 PM  
 Data Processed : 12/16/2015 4:29:53 PM

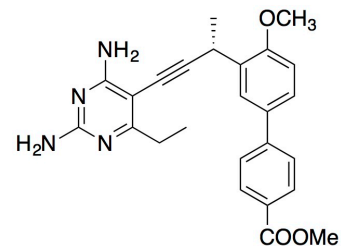

## <Chromatogram>

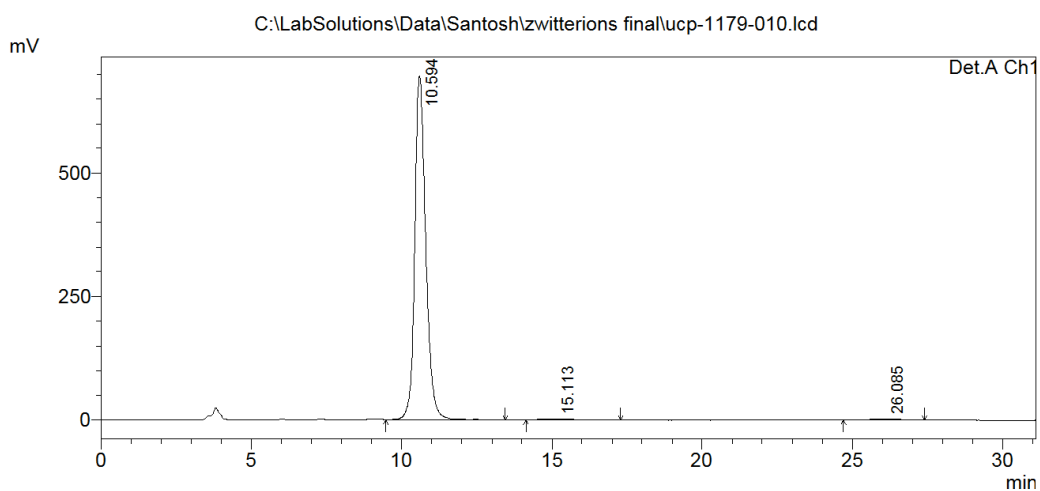

Detector A Ch1 254nm

| Peak# | Ret. Time | Area     | Height | Area %  | Height % |
|-------|-----------|----------|--------|---------|----------|
| 1     | 10.594    | 17490881 | 695753 | 98.569  | 99.598   |
| 2     | 15.113    | 109883   | 1253   | 0.619   | 0.179    |
| 3     | 26.085    | 144129   | 1553   | 0.812   | 0.222    |
| Total |           | 17744893 | 698559 | 100.000 | 100.000  |

# ==== Shimadzu LCsolution Analysis Report ====

C:\LabSolutions\Data\Santosh\zwitterions finalucp-1178-004.lcd  
 Acquired by : Admin  
 Sample Name : ucp-1178  
 Sample ID : ucp-1178  
 Tray# : 1  
 Vail # : 43  
 Injection Volume : 30 uL  
 Data File Name : ucp-1178-004.lcd  
 Method File Name : Test.lcm  
 Batch File Name :  
 Report File Name : Default.lcr  
 Data Acquired : 12/15/2015 7:35:51 PM  
 Data Processed : 12/15/2015 8:13:43 PM

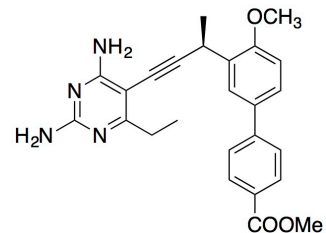

## <Chromatogram>

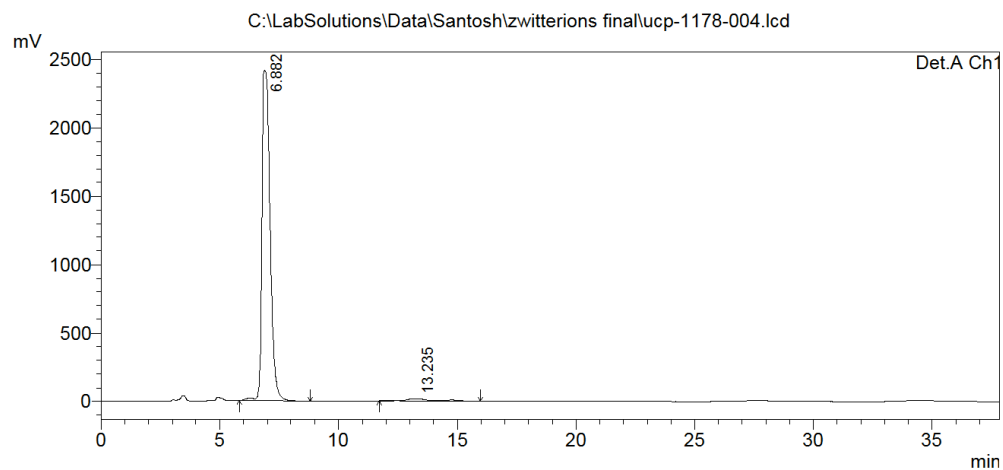

Detector A Ch1 254nm

| Peak# | Ret. Time | Area     | Height  | Area %  | Height % |
|-------|-----------|----------|---------|---------|----------|
| 1     | 6.882     | 57240718 | 2414401 | 98.065  | 99.312   |
| 2     | 13.235    | 1129429  | 16728   | 1.935   | 0.688    |
| Total |           | 58370147 | 2431129 | 100.000 | 100.000  |

==== Shimadzu LCsolution Analysis Report ====

C:\LabSolutions\Data\Santosh\zwitterions final\ucp-1178-010.lcd  
 Acquired by : Admin  
 Sample Name : ucp-1178  
 Sample ID : ucp-1178  
 Tray# : 1  
 Vail # : 43  
 Injection Volume : 10 uL  
 Data File Name : ucp-1178-010.lcd  
 Method File Name : Test.lcm  
 Batch File Name :  
 Report File Name : Default.lcr  
 Data Acquired : 12/16/2015 3:27:44 PM  
 Data Processed : 12/16/2015 3:57:58 PM

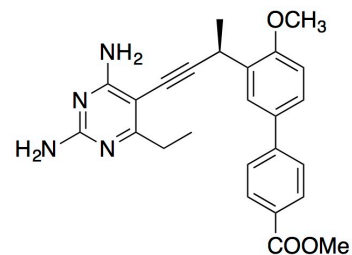

<Chromatogram>

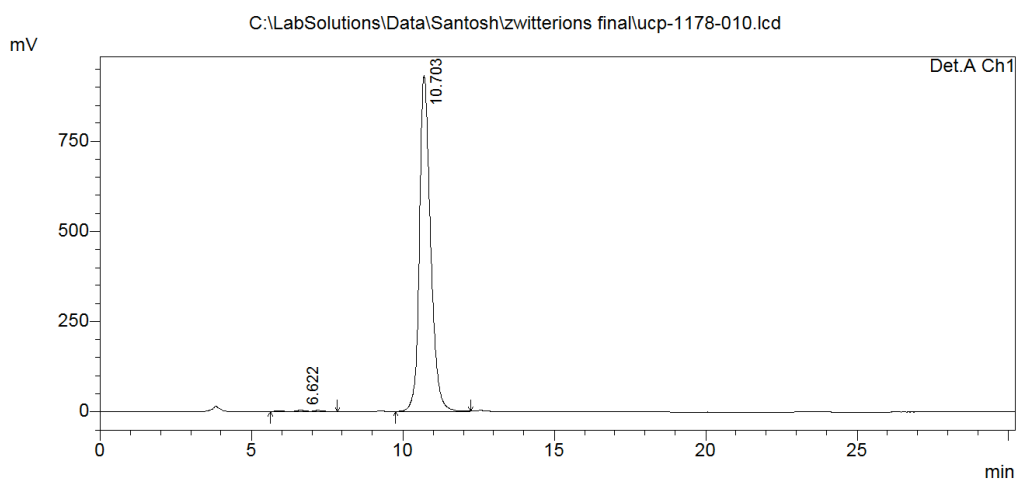

Detector A Ch1 254nm

| Peak# | Ret. Time | Area     | Height | Area %  | Height % |
|-------|-----------|----------|--------|---------|----------|
| 1     | 6.622     | 166295   | 4605   | 0.689   | 0.492    |
| 2     | 10.703    | 23980730 | 931521 | 99.311  | 99.508   |
| Total |           | 24147026 | 936126 | 100.000 | 100.000  |

==== Shimadzu LCsolution Analysis Report ====

C:\LabSolutions\Data\Santosh\zwitterions final\ucp-1163-001.lcd  
 Acquired by : Admin  
 Sample Name : ucp-1163  
 Sample ID : ucp-1163  
 Tray# : 1  
 Vial # : 43  
 Injection Volume : 40 uL  
 Data File Name : ucp-1163-001.lcd  
 Method File Name : Test.lcm  
 Batch File Name :  
 Report File Name : Default.lcr  
 Data Acquired : 12/14/2015 12:42:46 PM  
 Data Processed : 12/14/2015 1:18:54 PM

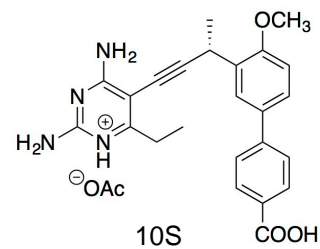

<Chromatogram>

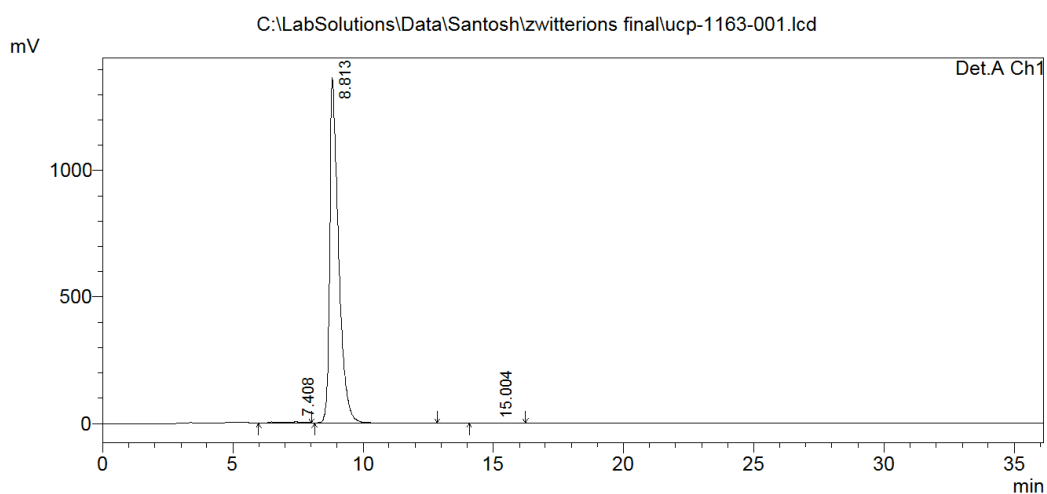

Detector A Ch1 254nm

| Peak# | Ret. Time | Area     | Height  | Area %  | Height % |
|-------|-----------|----------|---------|---------|----------|
| 1     | 7.408     | 335859   | 6538    | 1.019   | 0.474    |
| 2     | 8.813     | 32587903 | 1370135 | 98.856  | 99.417   |
| 3     | 15.004    | 41273    | 1491    | 0.125   | 0.108    |
| Total |           | 32965034 | 1378163 | 100.000 | 100.000  |

# ==== Shimadzu LCsolution Analysis Report ====

C:\LabSolutions\Data\Santosh\zwitterions final\ucp-1163-010.lcd  
 Acquired by : Admin  
 Sample Name : ucp-1163  
 Sample ID : ucp-1163  
 Tray# : 1  
 Vail # : 45  
 Injection Volume : 20 uL  
 Data File Name : ucp-1163-010.lcd  
 Method File Name : Test.lcm  
 Batch File Name :  
 Report File Name : Default.lcr  
 Data Acquired : 12/16/2015 4:35:14 PM  
 Data Processed : 12/16/2015 5:06:16 PM

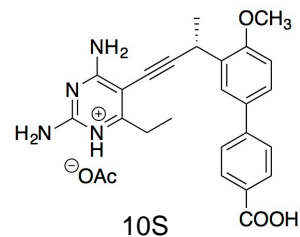

## <Chromatogram>

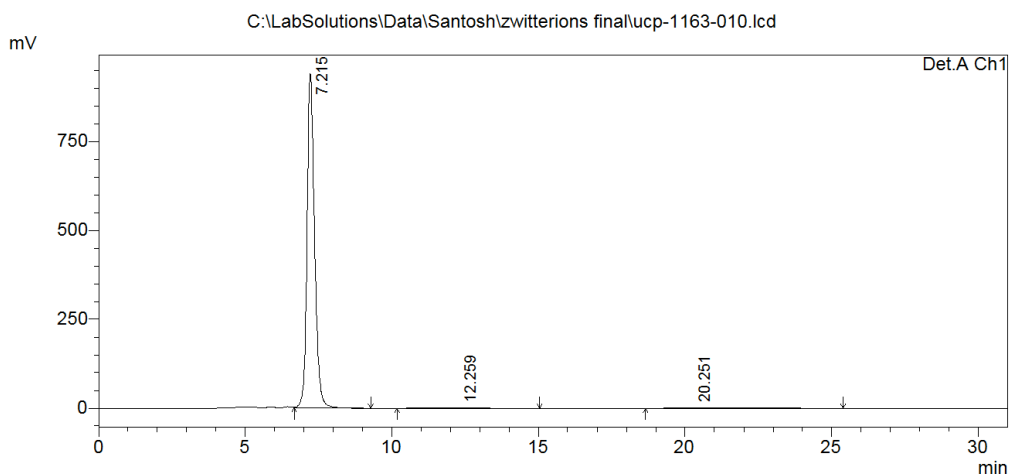

Detector A Ch1 254nm

| Peak# | Ret. Time | Area     | Height | Area %  | Height % |
|-------|-----------|----------|--------|---------|----------|
| 1     | 7.215     | 16832483 | 939672 | 97.558  | 99.738   |
| 2     | 12.259    | 180747   | 1190   | 1.048   | 0.126    |
| 3     | 20.251    | 240628   | 1280   | 1.395   | 0.136    |
| Total |           | 17253858 | 942142 | 100.000 | 100.000  |

# ==== Shimadzu LCsolution Analysis Report ====

C:\LabSolutions\Data\Santosh\zwitterions final\ucp-1164-001.lcd  
 Acquired by : Admin  
 Sample Name : ucp-1164  
 Sample ID : ucp-1164  
 Tray# : 1  
 Vial # : 44  
 Injection Volume : 40 uL  
 Data File Name : ucp-1164-001.lcd  
 Method File Name : Test.lcm  
 Batch File Name :  
 Report File Name : Default.lcr  
 Data Acquired : 12/14/2015 1:19:45 PM  
 Data Processed : 12/14/2015 1:53:47 PM

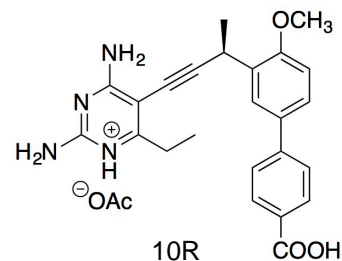

## <Chromatogram>

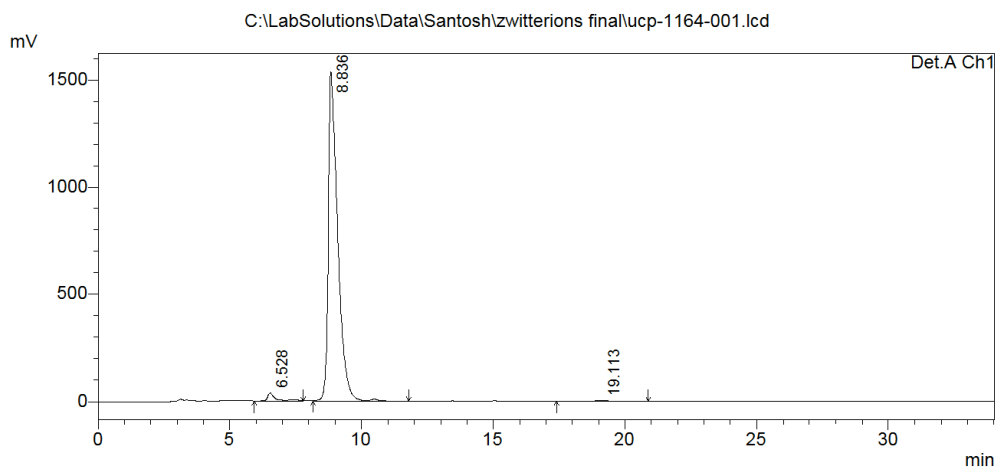

PeakTable

Detector A Ch1 254nm

| Peak# | Ret. Time | Area     | Height  | Area %  | Height % |
|-------|-----------|----------|---------|---------|----------|
| 1     | 6.528     | 1002068  | 38826   | 2.535   | 2.458    |
| 2     | 8.836     | 38315402 | 1537068 | 96.912  | 97.294   |
| 3     | 19.113    | 218907   | 3918    | 0.554   | 0.248    |
| Total |           | 39536376 | 1579812 | 100.000 | 100.000  |

==== Shimadzu LCsolution Analysis Report ====

C:\LabSolutions\Data\Santosh\zwitterions final\ucp-1164-010.lcd  
 Acquired by : Admin  
 Sample Name : ucp-1164  
 Sample ID : ucp-1164  
 Tray# : 1  
 Vail # : 46  
 Injection Volume : 20 uL  
 Data File Name : ucp-1164-010.lcd  
 Method File Name : Test.lcm  
 Batch File Name :  
 Report File Name : Default.lcr  
 Data Acquired : 12/16/2015 5:08:03 PM  
 Data Processed : 12/16/2015 5:41:06 PM

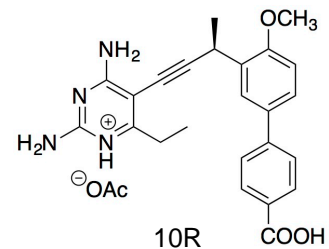

<Chromatogram>

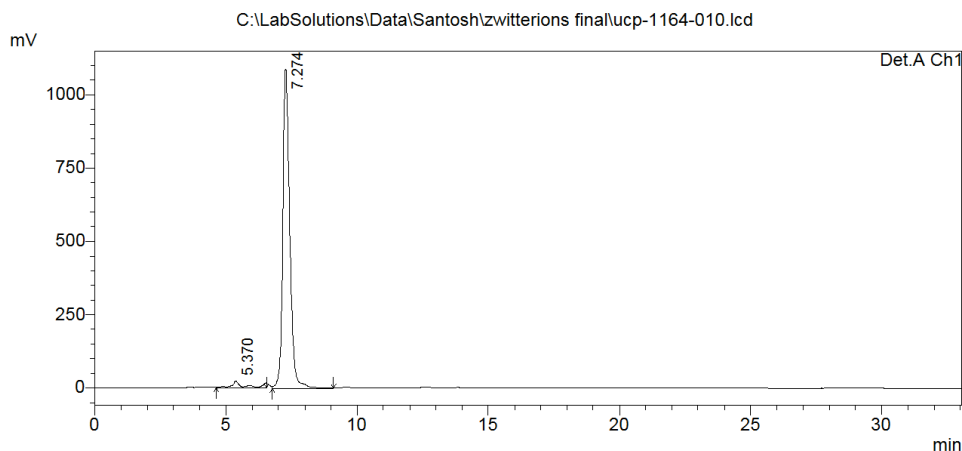

Detector A Ch1 254nm

| Peak# | Ret. Time | Area     | Height  | Area %  | Height % |
|-------|-----------|----------|---------|---------|----------|
| 1     | 5.370     | 762844   | 22995   | 3.685   | 2.070    |
| 2     | 7.274     | 19941162 | 1088070 | 96.315  | 97.930   |
| Total |           | 20704006 | 1111065 | 100.000 | 100.000  |

# ==== Shimadzu LCsolution Analysis Report ====

C:\LabSolutions\Data\Santosh\zwitterions final\ucp-1172-001.lcd  
 Acquired by : Admin  
 Sample Name : ucp-1172  
 Sample ID : ucp-1172  
 Tray# : 1  
 Vail # : 45  
 Injection Volume : 40 uL  
 Data File Name : ucp-1172-001.lcd  
 Method File Name : Test.lcm  
 Batch File Name :  
 Report File Name : Default.lcr  
 Data Acquired : 12/14/2015 1:54:49 PM  
 Data Processed : 12/14/2015 3:00:21 PM

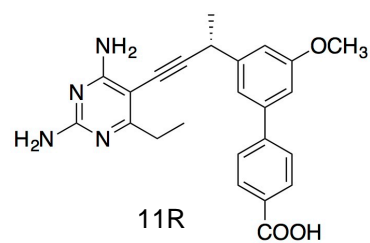

## <Chromatogram>

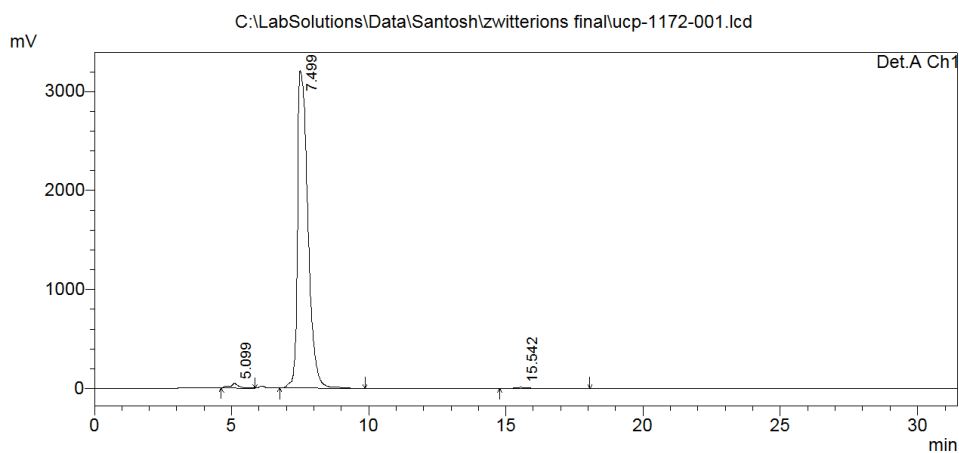

Detector A Ch1 254nm

| Peak# | Ret. Time | Area     | Height  | Area %  | Height % |
|-------|-----------|----------|---------|---------|----------|
| 1     | 5.099     | 1107205  | 46099   | 1.280   | 1.412    |
| 2     | 7.499     | 84943012 | 3203897 | 98.217  | 98.143   |
| 3     | 15.542    | 434618   | 14522   | 0.503   | 0.445    |
| Total |           | 86484834 | 3264518 | 100.000 | 100.000  |



# ==== Shimadzu LCsolution Analysis Report ====

C:\LabSolutions\Data\Santosh\zwitterions final\ucp-1172-021.lcd  
 Acquired by : Admin  
 Sample Name : ucp-1172  
 Sample ID : ucp-1172  
 Tray# : 1  
 Vail # : 47  
 Injection Volume : 5 uL  
 Data File Name : ucp-1172-021.lcd  
 Method File Name : Test.lcm  
 Batch File Name :  
 Report File Name : Default.lcr  
 Data Acquired : 12/16/2015 7:17:15 PM  
 Data Processed : 12/16/2015 7:45:30 PM

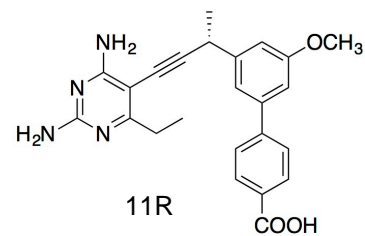

## <Chromatogram>

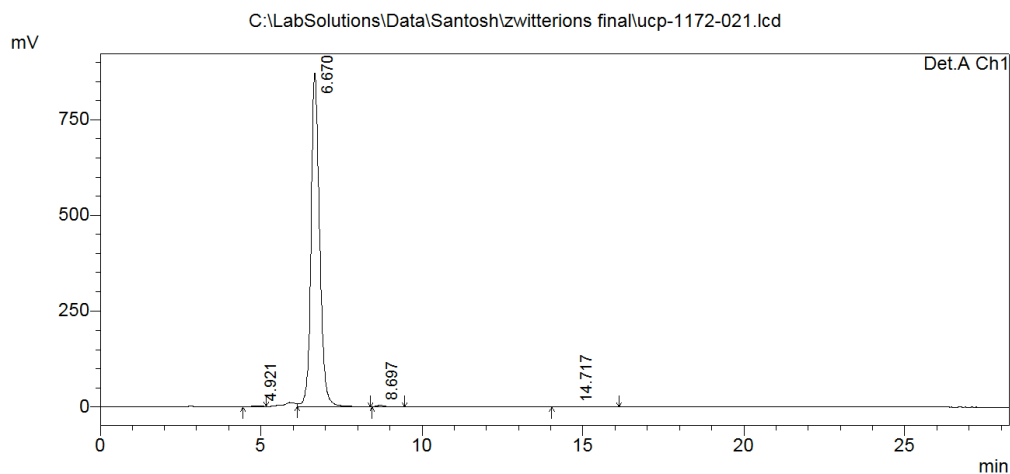

Detector A Ch1 254nm

| Peak# | Ret. Time | Area     | Height | Area %  | Height % |
|-------|-----------|----------|--------|---------|----------|
| 1     | 4.921     | 68872    | 2737   | 0.422   | 0.312    |
| 2     | 6.670     | 16167208 | 870906 | 98.969  | 99.200   |
| 3     | 8.697     | 82997    | 3588   | 0.508   | 0.409    |
| 4     | 14.717    | 16550    | 697    | 0.101   | 0.079    |
| Total |           | 16335627 | 877928 | 100.000 | 100.000  |

# ==== Shimadzu LCsolution Analysis Report ====

C:\LabSolutions\Data\Santosh\zwitterions final\ucp-1173-001.lcd  
 Acquired by : Admin  
 Sample Name : ucp-1173  
 Sample ID : ucp-1173  
 Tray# : 1  
 Vial # : 46  
 Injection Volume : 40 uL  
 Data File Name : ucp-1173-001.lcd  
 Method File Name : Test.lcm  
 Batch File Name :  
 Report File Name : Default.lcr  
 Data Acquired : 12/14/2015 2:27:10 PM  
 Data Processed : 12/14/2015 3:31:42 PM

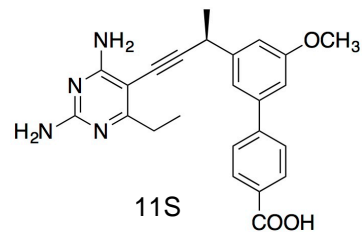

## <Chromatogram>

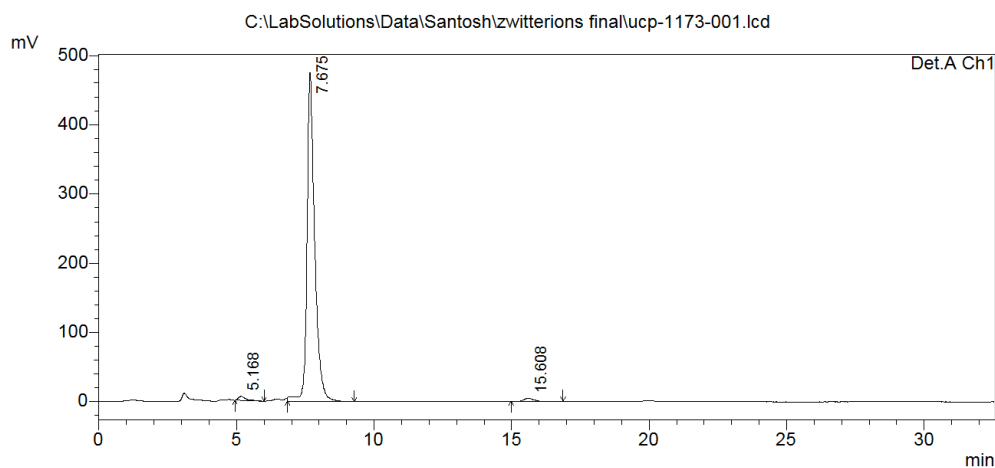

PeakTable

Detector A Ch1 254nm

| Peak# | Ret. Time | Area    | Height | Area %  | Height % |
|-------|-----------|---------|--------|---------|----------|
| 1     | 5.168     | 101096  | 5913   | 1.082   | 1.223    |
| 2     | 7.675     | 9160298 | 473314 | 98.040  | 97.867   |
| 3     | 15.608    | 81995   | 4403   | 0.878   | 0.910    |
| Total |           | 9343388 | 483629 | 100.000 | 100.000  |

# ==== Shimadzu LCsolution Analysis Report ====

C:\LabSolutions\Data\Santosh\zwitterions final\ucp-1173-020.lcd

Acquired by : Admin  
 Sample Name : ucp-1173  
 Sample ID : ucp-1173  
 Tray# : 1  
 Vial # : 48  
 Injection Volume : 20 uL  
 Data File Name : ucp-1173-020.lcd  
 Method File Name : Test.lcm  
 Batch File Name :  
 Report File Name : Default.lcr  
 Data Acquired : 12/16/2015 7:46:24 PM  
 Data Processed : 12/16/2015 8:23:32 PM

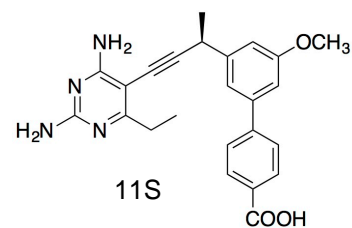

## <Chromatogram>

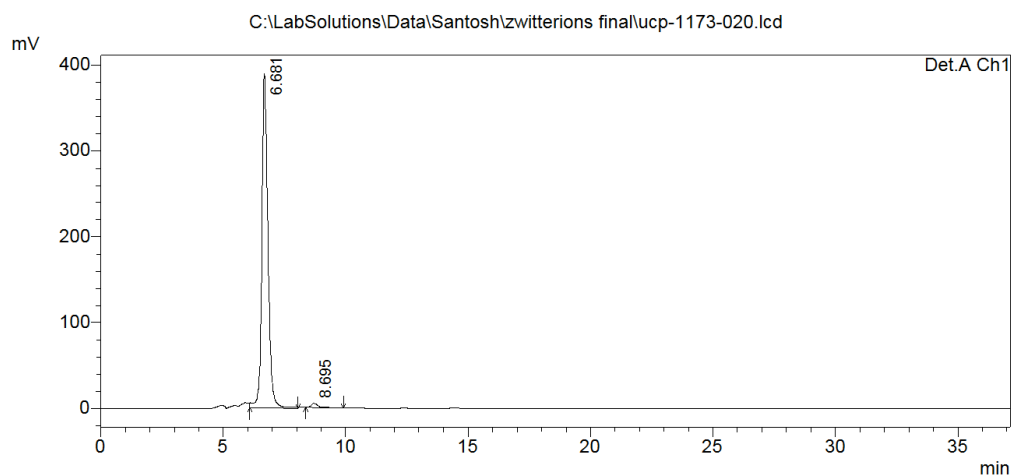

Detector A Ch1 254nm

| Peak# | Ret. Time | Area    | Height | Area %  | Height % |
|-------|-----------|---------|--------|---------|----------|
| 1     | 6.681     | 6693252 | 388581 | 98.608  | 98.773   |
| 2     | 8.695     | 94473   | 4829   | 1.392   | 1.227    |
| Total |           | 6787724 | 393410 | 100.000 | 100.000  |
